# Supplementary material for: Genome-wide analysis of basic helix-loop-helix transcription factors in papaya (Carica papaya L.)
Source: PeerJ. 2020 Jul 3;8:e9319. doi: 10.7717/peerj.9319 (PMC7341539; doi:10.7717/peerj.9319)
Supplement: Supplemental Information 1 [file peerj-08-9319-s001.xlsx]

## Sheet: Sheet1
	Primers used for qRT-PCR in this study
	LP(5’-3’)	RP(5’-3’)
CpbHLH006	CCCACCTTCATACCCGTTTC	GCGTAGACTGCTGCTCAACC
CpbHLH011	CTGGGAATTGGAGCTTTGAC	GATTTGAGCAGGAAGAGGAGTT
CpbHLH019	CGGTCAGCAGATCACCAACT	TTCTTCCCTCGCCCATTT
CpbHLH020	TCTGACAAGGCTTCAATGCTA	GGCTGAACCTGCTAAGACATT
CpbHLH022	ATGGAACGCGAGGGATTT	GTTCTGAGCATGATTCGAGGA
CpbHLH027	TGGCAGAAAGCAAAGACGA	GAAGATGGTGAGCAGGAAGC
CpbHLH035	AGGTCCTTTCGGGTTACAATC	TTTCTCTTCGTCTCCTTTCAGC
CpbHLH037	GGGGATGAAGTTGATGGGTC	GTGAAGGAACTAAAGATTTGGGAC
CpbHLH040	GCTGAAAGGGTGAGAAGAACG	TGCCGTGCTTGTTTGCTT
CpbHLH041	CGACAACGCCATACTAGACCA	CCATGCCCGAACCTGAAT
CpbHLH042	CGACTGATGTTGTGGGTTCTC	CAAATCCGTTCCCACCACT
CpbHLH046	ATGTGAATGGGAAGACAAGAGC	TCCATTTGGCACGAGGTTC
CpbHLH050	AGAAGACATTAATGGCGGTGG	AAGGCTTTGCGGGTCAGTAG
CpbHLH052	TGATAAACTTCAGAACCGGGTA	CGGAGCTGCTCTTTGGATT
CpbHLH053	ACCCGAATCAGCGAACGA	GCTCAACTGCCATATCCAACAT
CpbHLH056	AGTGTCTGATAGCGGGAGCA	CGCCATACCCATTGTCTTGT
CpbHLH060	AACAACTCCAGCTTCAAGTGC	TCATCGTGGTAACCCATTCC
CpbHLH062	TTCCCGTCAACTGGTGCA	TCCTCTTCCGCTTCCTATCTAC
CpbHLH065	TTTTGGGAGGTGTTGTTGAGT	GAGGCTTAACCACAGCATGAG
CpbHLH068	ACGCAAGAGGACTCGCACTA	GGAATAGGTCCCGTAAGATGC
CpbHLH069	CACTATGCTGCGAAGACCG	GAAATGGACAGACTCAACGCTA
CpbHLH070	CTACAGGCGTTGATTGAGGG	TCGGCAAGTGATGAAGGAGT
TBP2	TGTGAATACTGGTGCTGAG	GGCATGAGACAAGACCTATA
