# Supplementary material for: Genome-wide analysis of basic helix-loop-helix transcription factors in papaya (Carica papaya L.)
Source: PeerJ. 2020 Jul 3;8:e9319. doi: 10.7717/peerj.9319 (PMC7341539; doi:10.7717/peerj.9319)
Supplement: Supplemental Information 2 [file peerj-08-9319-s002.xlsx]

## Sheet: Sheet1
name	Protein_id	Direction	Length（aa）	Locus ID	Introns	Hydrophobicity	MW(kDA)	Half_life	pI	ORF(bp)	Exons
CpbHLH01	evm.model.supercontig_1024.1	-	511	evm.TU.supercontig_1024.1	2	-0.523	56000.7	5.5	5.58	1533	3
CpbHLH02	evm.model.supercontig_106.57	-	387	evm.TU.supercontig_106.57	4	-0.687	41978.3	1	5.14	1164	5
CpbHLH03	evm.model.supercontig_115.71	+	247	evm.TU.supercontig_115.71	4	-0.5659	28449.3	1	5.25	744	5
CpbHLH04	evm.model.supercontig_1.175	-	573	evm.TU.supercontig_1.175	7	-0.5756	61565.9	1.1	5.52	1722	8
CpbHLH05	evm.model.supercontig_117.94	+	115	evm.TU.supercontig_117.94	3	-0.5608	12879.9	4.4	11.07	345	4
CpbHLH06	evm.model.supercontig_120.27	-	167	evm.TU.supercontig_120.27	0	-0.643	18835.1	1.1	7.8	504	1
CpbHLH07	evm.model.supercontig_12.1	+	522	evm.TU.supercontig_12.1	7	-0.7064	56992.8	4.4	6.32	1569	8
CpbHLH08	evm.model.supercontig_1213.3	-	391	evm.TU.supercontig_1213.3	4	-0.5769	43155	5.5	8.62	1176	5
CpbHLH09	evm.model.supercontig_124.41	-	186	evm.TU.supercontig_124.41	2	-0.5499	21200.2	1.3	8.97	561	3
CpbHLH10	evm.model.supercontig_129.19	+	330	evm.TU.supercontig_129.19	3	-0.5202	37386.3	1	5.02	993	4
CpbHLH11	evm.model.supercontig_129.37	+	377	evm.TU.supercontig_129.37	3	-0.5081	42099.6	1.1	7.24	1134	4
CpbHLH12	evm.model.supercontig_131.7	-	418	evm.TU.supercontig_131.7	0	-0.541	45977.1	1.1	5.69	1257	1
CpbHLH13	evm.model.supercontig_141.19	-	495	evm.TU.supercontig_141.19	0	-0.5161	54853.6	1.1	5.66	1488	1
CpbHLH14	evm.model.supercontig_14.15	+	92	evm.TU.supercontig_14.15	1	-0.4314	10430.8	1.9	7.94	279	2
CpbHLH15	evm.model.supercontig_142.14	+	349	evm.TU.supercontig_142.14	3	-0.5134	38330.6	1	5.07	1050	4
CpbHLH16	evm.model.supercontig_157.5	+	563	evm.TU.supercontig_157.5	7	-0.6155	60656.6	1	6.65	1692	8
CpbHLH17	evm.model.supercontig_160.32	-	401	evm.TU.supercontig_160.32	6	-0.6475	43318	30	5.62	1206	7
CpbHLH18	evm.model.supercontig_17.155	-	301	evm.TU.supercontig_17.155	3	-1.0125	33527.4	1	6.47	906	4
CpbHLH19	evm.model.supercontig_175.4	+	865	evm.TU.supercontig_175.4	10	-0.2466	94320.1	1.9	4.88	2598	11
CpbHLH20	evm.model.supercontig_177.1	-	346	evm.TU.supercontig_177.1	3	-0.5722	39313.1	1	4.86	1041	4
CpbHLH21	evm.model.supercontig_183.32	-	92	evm.TU.supercontig_183.32	1	-0.6434	10497.8	1.9	9.09	279	2
CpbHLH22	evm.model.supercontig_1892.1	+	475	evm.TU.supercontig_1892.1	0	-0.3845	53133.9	1	5.82	1428	1
CpbHLH23	evm.model.supercontig_19.156	-	247	evm.TU.supercontig_19.156	1	-0.3562	27194.9	1	9.1	744	2
CpbHLH24	evm.model.supercontig_19.98	-	162	evm.TU.supercontig_19.98	3	-0.1974	17640.1	100	5.57	489	4
CpbHLH25	evm.model.supercontig_200.36	+	295	evm.TU.supercontig_200.36	1	-0.7599	33396	1	6.13	885	2
CpbHLH26	evm.model.supercontig_203.5	+	232	evm.TU.supercontig_203.5	5	-0.5952	26076.7	5.5	9.42	699	6
CpbHLH27	evm.model.supercontig_20.63	+	348	evm.TU.supercontig_20.63	3	-0.3924	39211.8	1	8.35	1047	4
CpbHLH28	evm.model.supercontig_20.95	+	626	evm.TU.supercontig_20.95	7	-0.7533	71181.7	1.4	5.49	1881	8
CpbHLH29	evm.model.supercontig_21.176	+	340	evm.TU.supercontig_21.176	5	-0.4405	36376.6	4.4	5.26	1023	6
CpbHLH30	evm.model.supercontig_21.177	+	290	evm.TU.supercontig_21.177	2	-0.514	32066.2	1.9	6.63	873	3
CpbHLH31	evm.model.supercontig_212.3	-	205	evm.TU.supercontig_212.3	3	-0.5165	23232.4	1.4	9.91	618	4
CpbHLH32	evm.model.supercontig_21.7	-	219	evm.TU.supercontig_21.7	1	-0.7346	24275.5	1	9.27	660	2
CpbHLH33	evm.model.supercontig_23.65	+	364	evm.TU.supercontig_23.65	8	-0.5754	39604.4	1.4	6.92	1095	9
CpbHLH34	evm.model.supercontig_27.162	+	459	evm.TU.supercontig_27.162	6	-0.5535	50384	30	6.05	1380	7
CpbHLH35	evm.model.supercontig_27.35	+	184	evm.TU.supercontig_27.35	2	-0.6195	20603.2	1	8.07	555	3
CpbHLH36	evm.model.supercontig_282.7	+	254	evm.TU.supercontig_282.7	5	-0.8141	28850.4	1.1	6.72	765	6
CpbHLH37	evm.model.supercontig_289.6	-	293	evm.TU.supercontig_289.6	7	-0.9781	32693	1	5.87	882	8
CpbHLH38	evm.model.supercontig_3.225	+	562	evm.TU.supercontig_3.225	10	-0.7933	61577.6	1	8.64	1689	11
CpbHLH39	evm.model.supercontig_3.503	+	282	evm.TU.supercontig_3.503	5	-0.4811	31099.9	4.4	6.35	849	6
CpbHLH40	evm.model.supercontig_3.51	+	354	evm.TU.supercontig_3.51	2	-0.4705	38558.5	1.9	5.68	1065	3
CpbHLH41	evm.model.supercontig_36.191	-	320	evm.TU.supercontig_36.191	2	-0.308	35690.5	4.4	6.2	963	3
CpbHLH42	evm.model.supercontig_388.7	+	91	evm.TU.supercontig_388.7	1	-0.6636	10369.7	1.9	9.09	276	2
CpbHLH43	evm.model.supercontig_4.112	+	360	evm.TU.supercontig_4.112	6	-0.6424	40010.1	4.4	6.75	1083	7
CpbHLH44	evm.model.supercontig_4.179	+	235	evm.TU.supercontig_4.179	2	-0.5646	26774.5	1.1	9.37	708	3
CpbHLH45	evm.model.supercontig_4.181	+	217	evm.TU.supercontig_4.181	2	-0.4796	24565.9	1.1	6.83	654	3
CpbHLH46	evm.model.supercontig_44.78	+	221	evm.TU.supercontig_44.78	4	-0.7316	25001.2	1	5.42	666	5
CpbHLH47	evm.model.supercontig_48.15	-	313	evm.TU.supercontig_48.15	2	-0.6248	35398.5	4.4	8.83	942	3
CpbHLH48	evm.model.supercontig_489.5	-	224	evm.TU.supercontig_489.5	0	-0.4352	25033.3	7.2	5.38	675	1
CpbHLH49	evm.model.supercontig_489.6	+	306	evm.TU.supercontig_489.6	1	-0.5267	34690.2	4.4	5.42	921	2
CpbHLH50	evm.model.supercontig_49.31	-	255	evm.TU.supercontig_49.31	0	-0.5023	28093.1	1	7.92	768	1
CpbHLH51	evm.model.supercontig_50.37	+	598	evm.TU.supercontig_50.37	6	-0.4119	66090.6	5.5	5.52	1797	7
CpbHLH52	evm.model.supercontig_52.26	+	679	evm.TU.supercontig_52.26	6	-0.5827	75898.9	4.4	5.37	2040	7
CpbHLH53	evm.model.supercontig_52.7	-	316	evm.TU.supercontig_52.7	5	-0.5233	34938	1	5.22	951	6
CpbHLH54	evm.model.supercontig_52.97	-	334	evm.TU.supercontig_52.97	4	-0.2098	35400.4	4.4	7.07	1005	5
CpbHLH55	evm.model.supercontig_5.303	+	270	evm.TU.supercontig_5.303	5	-0.7314	29593.9	0.8	5.85	813	6
CpbHLH56	evm.model.supercontig_53.118	-	346	evm.TU.supercontig_53.118	1	-0.5606	38193.1	1.2	6.06	1041	2
CpbHLH57	evm.model.supercontig_537.2	+	634	evm.TU.supercontig_537.2	6	-0.4173	70941.5	4.4	5.89	1905	7
CpbHLH58	evm.model.supercontig_55.142	+	289	evm.TU.supercontig_55.142	0	-0.4061	31903.4	1.1	9.34	870	1
CpbHLH59	evm.model.supercontig_55.51	-	219	evm.TU.supercontig_55.51	1	-0.3848	24539.7	1	10.36	660	2
CpbHLH60	evm.model.supercontig_55.64	+	320	evm.TU.supercontig_55.64	2	-0.3946	35946.7	4.4	6.8	963	3
CpbHLH61	evm.model.supercontig_57.28	+	496	evm.TU.supercontig_57.28	5	-0.7717	55940.2	20	9.24	1491	6
CpbHLH62	evm.model.supercontig_57.85	-	396	evm.TU.supercontig_57.85	3	-0.7017	45150	1	6.09	1191	4
CpbHLH63	evm.model.supercontig_58.45	+	255	evm.TU.supercontig_58.45	2	-0.674	29421.5	1.1	8.96	768	3
CpbHLH64	evm.model.supercontig_59.132	-	346	evm.TU.supercontig_59.132	2	-0.5577	38757.9	0.8	6.05	1041	3
CpbHLH65	evm.model.supercontig_61.16	-	471	evm.TU.supercontig_61.16	5	-0.5642	53963.8	1.1	6.45	1416	6
CpbHLH66	evm.model.supercontig_6.130	+	336	evm.TU.supercontig_6.130	5	-0.5636	37183	5.5	6.19	1011	6
CpbHLH67	evm.model.supercontig_6.173	-	403	evm.TU.supercontig_6.173	6	-0.7237	45075.9	1	8.43	1212	7
CpbHLH68	evm.model.supercontig_62.160	+	410	evm.TU.supercontig_62.160	6	-0.4977	45361.5	1.4	6.56	1233	7
CpbHLH69	evm.model.supercontig_6.255	-	152	evm.TU.supercontig_6.255	4	-1.0124	17725.9	1.1	5.24	459	5
CpbHLH70	evm.model.supercontig_65.44	-	252	evm.TU.supercontig_65.44	6	-0.5031	28097	4.4	7.68	759	7
CpbHLH71	evm.model.supercontig_65.63	+	326	evm.TU.supercontig_65.63	4	-0.4465	35500.8	1.9	6	981	5
CpbHLH72	evm.model.supercontig_69.31	-	170	evm.TU.supercontig_69.31	2	-0.3681	19225.1	1	9.54	513	3
CpbHLH73	evm.model.supercontig_69.33	-	170	evm.TU.supercontig_69.33	2	-0.3705	19251	1	9.21	513	3
CpbHLH74	evm.model.supercontig_69.52	-	666	evm.TU.supercontig_69.52	9	-0.4921	75228.7	1.9	8.86	2001	10
CpbHLH75	evm.model.supercontig_70.77	-	550	evm.TU.supercontig_70.77	3	-0.5821	59672.4	100	5.16	1653	4
CpbHLH76	evm.model.supercontig_71.72	+	654	evm.TU.supercontig_71.72	0	-0.6279	71216.9	1.4	5.41	1965	2
CpbHLH77	evm.model.supercontig_7.53	+	261	evm.TU.supercontig_7.53	1	-0.3873	28817.7	4.4	8.64	786	2
CpbHLH78	evm.model.supercontig_8.103	+	559	evm.TU.supercontig_8.103	7	-0.6235	60559.7	1.1	6.8	1680	8
CpbHLH79	evm.model.supercontig_81.11	+	242	evm.TU.supercontig_81.11	4	-0.5693	26828.3	100	5.89	729	5
CpbHLH80	evm.model.supercontig_8.199	-	604	evm.TU.supercontig_8.199	8	-0.6085	65816.3	1	7.03	1815	9
CpbHLH81	evm.model.supercontig_8.253	-	347	evm.TU.supercontig_8.253	0	-0.3204	38318	1	6.04	1044	1
CpbHLH82	evm.model.supercontig_82.59	-	530	evm.TU.supercontig_82.59	6	-0.382	57202	1.1	5.02	1593	7
CpbHLH83	evm.model.supercontig_84.89	+	402	evm.TU.supercontig_84.89	5	-0.7969	45105.5	1	8.84	1209	6
CpbHLH84	evm.model.supercontig_85.115	-	277	evm.TU.supercontig_85.115	5	-0.6281	30180.7	1.1	8.97	834	6
CpbHLH85	evm.model.supercontig_85.120	+	370	evm.TU.supercontig_85.120	6	-0.7029	41056.5	1.1	5.49	1113	7
CpbHLH86	evm.model.supercontig_92.83	-	237	evm.TU.supercontig_92.83	1	-0.4404	26424.9	0.8	8.18	714	2
CpbHLH87	evm.model.supercontig_9.363	+	144	evm.TU.supercontig_9.363	4	-0.3284	15994.5	30	9.45	435	5
CpbHLH88	evm.model.supercontig_97.78	-	181	evm.TU.supercontig_97.78	3	-0.5607	20014.2	4.4	9.59	546	4
CpbHLH89	evm.model.supercontig_99.32	+	309	evm.TU.supercontig_99.32	6	-0.4145	33948.1	1	6.66	930	7
CpbHLH90	evm.TU.contig_26556.1	+	517	gevm.TU.contig_26556.1	6	-0.6755	56912.9	4.4	6.5	1554	7
CpbHLH91	evm.TU.contig_27490.2	+	314	evm.TU.contig_27490	4	-0.5833	34670.6	20	5.62	945	5
CpbHLH92	evm.TU.contig_28125.2	+	279	gevm.TU.contig_28125.2	3	-0.268	31279.4	1.1	4.71	840	4
CpbHLH93	evm.TU.contig_30141.2	+	247	gevm.TU.contig_30141.2	3	-0.6987	27536.2	100	5.86	744	4
CpbHLH94	evm.TU.contig_30708.1	+	428	gevm.TU.contig_30708.1	5	-0.5625	45304.3	0.8	6.04	1287	6
CpbHLH95	evm.TU.contig_31184.1	+	331	evm.TU.contig_31184	2	-0.4286	36512.1	100	5.07	996	3
CpbHLH96	evm.TU.contig_36549.1	+	78	evm.TU.contig_36549	1	-0.2127	8995.25	1.4	4.79	237	2
CpbHLH97	evm.TU.contig_45766.1	+	100	evm.TU.contig_45766	3	-0.6229	11524.6	4.4	10.08	303	4
CpbHLH98	evm.TU.contig_45808.1	-	260	evm.TU.contig_45808	0	-0.6049	29023.5	20	6.24	783	1
CpbHLH99	evm.TU.contig_46440.1	-	188	evm.TU.contig_46440	0	-0.7276	21338.9	1.1	5.79	564	1
	Minimum		78		0	-1.0125	8995.25	0.8	4.71	237	1
	Maximum		865		10	-0.1974	94320.1	100	11.07	2598	11
	Average		340.646		3.55556	-0.553458	37758.9	8.4404	6.91687	1024.82	5

## Sheet: New_modified
name	Protein_id	Direction	Length（aa）	Locus ID	Introns	Hydrophobicity	MW(Da)	Half_life	pI	ORF(bp)	Exons	Amino acid sequence
CpbHLH001	evm.model.supercontig_82.59	-	530	evm.TU.supercontig_82.59	6	-0.382	57202	1.1	5.02	1593	7	MDEYLDHYFSSSSWSDMKTAERLSWDCVEPNKPDVLLSSSLEVFENDEKSSPVRMIISSPNVECLTAKDTSSIVLGGESDYAGENCLLSRGDQLQQNGENCNRNSSSGVLNGRVNFGNRVECSPAIPSSVSYTEAVFTPDSVNLLPPKHITSIDDITCLSFTKMGYVGCNGTELSDDLRSLQDLSTLSPISQLLPPSFDDVYSLSHVMGQERKQGFAFQGENADSDGHKYVEMNKILQHDNLSVSVAVQGKQDLQKNSLPSSASEPQITMTTVGLPSLLENSSNTHSGGCHGTGKPRVRARRGQATDPHSIAERLRREKIAERMKNLQELVPNSNKTDKASMLDEIIEYVKFLQLQVKVLSMSRLGAAGAVVPLITDGQAEGSNGLSFSTSAGQGVDFL…
CpbHLH002	evm.model.supercontig_59.132	-	346	evm.TU.supercontig_59.132	2	-0.5577	38757.9	0.8	6.05	1041	3	MQFADFGPKLGLSPTKVPEEETGIDPVYFLKFPVLNDKLENHQLLMAAGPSGGDTEENKFKGAGSTGNRAGVVLLPHEDNKEGREDQEEEARVSKKNSVQQLQFLGDQDHDNIQNKNTVNEGKNKRKRPRTIKTSEEVESQRMTHIAVERNRRKQMNEHLRVLRSLMPGSYVQRGDQASIIGGAIEFVRELEQLLQCLESQKRRRLLGEAQVRQMGDSSSMTGVQQPPLIFPAPLPQLPTDQIFDAGIREETAENKSCLADVEVKVLGFDAMIKILSRRRPGQLIKIIAALEDLQLNILHTNITTIEQTVLYSFNVKVGSETRFTAEDIASSVQQIFSFIHANSGM
CpbHLH003	evm.model.supercontig_117.94	+	115	evm.TU.supercontig_117.94	3	-0.5608	12879.9	4.4	11.07	345	4	MAGLFPAFGQIQTHSIRPPPPPPPPAPQLHQTFHSQPTPATVAAASHPPTIRPRVRARRGQATDPHSIAERLRRERIAERMKALQELVPSCNKTDRAAMLDEIVDYVKFLRLQVK
CpbHLH004	evm.model.supercontig_129.19	+	330	evm.TU.supercontig_129.19	3	-0.5202	37386.3	1	5.02	993	4	MELTQVGFLEELLAPRRESWTTFVSGLTEFFPNGSWSFDSLEDNPTLASPNNPSMAGFESSFECPFSDQTYPCFVDGFTVPEIESSPFPAQEDYPSMADHDDELVLLSHHHHPDHSLEERQSTCKVEMEQSSNNVQVFNMGLCGGEKKINKSKKLEGQPSKNLMAERRRRKRLNDRLSMLRSIVPKISKMDRTSILGDTIDYMKELMEKINKLQEEKSEMGFNQINLITNLKELKPSESMVRNSPKFDIERREMDTRIDICCATKPGLLLSTVGTLEALGLEIQQCVISCFNDFSLQASCSEVAEQRTLVSPEDIKQALFRNAGYGGRCL
CpbHLH005	evm.model.supercontig_81.11	+	242	evm.TU.supercontig_81.11	4	-0.5693	26828.3	100	5.89	729	5	MVSPENPNWVFDYALLEDISVPGGDLPSLDPPGVLWSSHSFSTGSATDANPHSVEFNDSLRNSDGLKEAGSRKRVRPESCSSSGSKACREKMRRDRLNDRFLELSYVLDPGRSPKVDKSLILVEAVRMVNQLRDEARKLEELNQDLQEKVNELKAEKNELRDEKQRLKTDKESLERQVKALGSQPGFLPHLPAIAAPFSAPAQVVGGKLVPFVSYPGVSMWQFMPPAAVDTSQDHVLRPPVA
CpbHLH006	evm.model.supercontig_17.155	-	301	evm.TU.supercontig_17.155	3	-1.0125	33527.4	1	6.47	906	4	MEEELKDSNAARKMQKADREKLRRDRLNEHFLKLGKTIDPDRPKNDKGTILADTIQLLKDLTSEVNKLKAEYAMLTEESCELTQEKNDLREEKASLKSDIENLNIQYQQRSRAIFPWAAMDHSVVMAPPSYPFPMPVPMPPGPIPMHPSMQLQPYPFFGNQNPGVISAPVSTYIPFMTPNTMVEQQSTHVPPTMQPGNRSQVSGKQDSRSKSSRESKADKTEDSNDVATDLELKTPGSTVDQDLSSGQRKSKKPWKDENSSKEGSSSSRCSSSPSGQDSSSNSIVGGRSSDVLEGKKDQQR
CpbHLH007	evm.model.supercontig_131.7	-	418	evm.TU.supercontig_131.7	0	-0.541	45977.1	1.1	5.69	1257	1	MDIGFGWDSAEVVTNTSSSLWSGNPGEMEESLLMSNSNSCIYGAKMDLTDHVLTNSVSHDHHQTASHEQSHVVSNMNLLQCHYEASSNLAQNIMQAAKSSSWGDGLTSELCPAASLESLDCLISATNSNTDASVEDDGISMIFSDCRNLWNFPTAASSGESGNNPGKYEENKCGLNDQVNETAFQTSSDHQVNHMKKRRSKVKADGDLQNYGHLNLVQTDSCTTEGGGFMLISENPQKCKKPRSDKQSSNISFQLQPSSSSVSSCMEEADAEAIAQMKEMIYRAAAFRPVNLGLEMVEKPRRKNVRISTDPQTVAARQRRERISERIRVLQRLVPGGIKMDTASMLDEAANYLKFLRSQVKALENLSHRPDSATPLTTTLAFASNSSSLVFPLTAHSFP…
CpbHLH008	evm.model.supercontig_55.142	+	289	evm.TU.supercontig_55.142	0	-0.4061	31903.4	1.1	9.34	870	1	MDVDMINSSPSSVAAEDHMEIMTMMMQMEKLPEFCDLNFHASNSSLHPEIQFSTSGNTLQQPIFQHPNTNINPTSCSSSSSTSSMLINLPTSTSFMANPVPETSISTHHLHHPSVPTSGKFRYGGLGPLFSNNANSYASSVEKKSSMAAMREMIFRIAAMQPIHIDPESIKPPKRRNVRISKDPQSVAARHRRERISERIRILQRLVPGGTKMDTASMLDEAIHYVKFLKRQVQSLEQVAANRPMGSGLGLSGATLATNMGYSPLVKACQPSNSAHYHHQAMGNIQMLR
CpbHLH009	evm.model.supercontig_85.120	+	370	evm.TU.supercontig_85.120	6	-0.7029	41056.5	1.1	5.49	1113	7	MDLIGGIIARSSPREPEPDETVLDSLQFNEEIHRMMAAPPENGSSFTALLELPATQAMELLHSSDSGNSPAPRAGDDDLKHSFQSFDGTMNFPSNTALIERAARFSLFAGEHISNNSPETSSVPSNSSGNLERVKSEPAETESSQPLVSDPAAENQSHNQNQRSAVKRKEREKKVAKGSAKKTKSAANDSSEDAEKLPYVHVRVRRGQATDSHSLAERARREKINARMKLLQELVPGCNKISGTALVLDEIINHVQSLQRQVEFLSMRLATVNPRVDFNLDNILAAESGSLMDSNFPSMVMPMMWPEVPVSGNRQQYQQQQWHFDAFHQPVWGREEENHHNFTTPENSLLSYDSSANSATLHSSQLKMEL
CpbHLH010	evm.model.supercontig_3.51	+	354	evm.TU.supercontig_3.51	2	-0.4705	38558.5	1.9	5.68	1065	3	MSQSLSDLFDDNREFGDALSLVGDDLFALLESLDNVADFPPLTPLDETSASAGGGGAGEEATTRRLVSQKSTSSTTLVHDYPETEFEPCCNSPKSKRAKVASSSQQDQEGRNQDEPQRMSHITVERNRRKQMNDHLSVLRSLMPCFYVKRGDQASIISGVIDYINELQQVLQSLEAKKQRKAYSEVLSPRVPVVSSPRPSPLSPRKPPLSPRINLPISPRTPQPNSPYKPPRLHNQPYLSSPTGMQLDPSPSSSSTSGCSVDGGKELVANSKSALADVEVKFSGPNLVLKTVSGRIPGQAAKIMAALEELALEILHVNINTVDETMLNSFTIKIGIECQLSAEELAQQIQKTFC
CpbHLH011	evm.model.supercontig_48.15	-	313	evm.TU.supercontig_48.15	2	-0.6248	35398.5	4.4	8.83	942	3	MALEAVVFQQDQLFTGYTTRDLYNLFGAGNWSFDGHFGFARDEQDQDRNFLQNQTENLDQQPPNSTVSQTQFNELHHPNSSSCSNQYGTIDGSNSSANPTNVSTITRSKRRRSKSRKNKEEIENQRMTHIAVERNRRKQMNEYLSVLRSLMPESYVQRGDQASIIGGAINFVKELEHRLQLLGSQKEITNPERSDSVAPFSEFFTFPQYSTSSSSTRGGLVTHNSVAMNEEEQAAHVIIPNSTQCAIADIEVTMVESHANLKIRSRRRPKQLLKVVSGLHAMRLTVLHLNVSTVDQTVLYSLSVKVRLKMTVS
CpbHLH012	evm.model.supercontig_157.5	+	563	evm.TU.supercontig_157.5	7	-0.6155	60656.6	1	6.65	1692	8	MEKEKVVVSEGVNQTAQPIWSSSSFGMEIQNCGMEQLPNCFFNPNWENSVDQSDPFESALSSLVSSPVTSNAAGDILPPVGGVGGGLMINELIGRIGNIAGSGEKSHQSYIINSNSHGGTNNSCYNNPLNSPPKRNSPMMVSQIRGNLPIPGNLFPDHPNLTQFTADPGFAERAARLSCFRSGMNGGTGLNGDSVGLSHGSVHRTESSKLSKVSSNQSIKLAGSLLNGQESNKSSTQDPNSDEKFSKVSRSLVPINGEFVDSRENSSVSEQIPVVESSFKGPNEGSSRKRKSISRGKAVETPSVSPSANDAKVTAENDESRAKRSKEDHSTICENEKVKPESNGNDGNSKQGKDNSKPPEPPKDYIHVRARRGQATDSHSLAERVRREKISERMKFLQD…
CpbHLH013	evm.model.supercontig_203.5	+	232	evm.TU.supercontig_203.5	5	-0.5952	26076.7	5.5	9.42	699	6	MLLLCMRAGFSLERWGTCFLGRSRVVQERDGQLSANQRLRTLTMIAYFSWWQNDSNGKRMKIVGSKSENSASKAEVEASSAGGKKPPEQNSKPSEPPKDYIHVRARRGQATDSHSLAERARREKISERMKILQDLVPGCSKVIGKALVLDEIINYIQSLQRQVEFLSMKLEAVNSRMNMHPTIEGFHSKDLGSQPFDASGMLFGPQPTREYAQGSESEWLHMQVGGTFERAA
CpbHLH014	evm.model.supercontig_57.28	+	496	evm.TU.supercontig_57.28	5	-0.7717	55940.2	20	9.24	1491	6	MIRSNDDYEELIWEDGRVRMRGLSRKSSVQKTPSFLGYSYQSSKAQEQRGEDTSAPKRVRFEAAPDHINKYPLLRQSILDRRKLGGDNDEKMMESSPSYYPKSAAAFFYEHKRSKNVNDPQTVPVNEYGNLEAAEPFTNTNCLPTVPDTDNILIIPQALDPRLDSSRSQKQYSITGKASERRNFSMFLTPQVLGKPNCSWRHLSSGVQEMQRNCSKSIKNVELNQPNYSNRAQIERTEMMVPGDEQSAAVETHRTQIHDSLRVNRNKRKHSDETIGEVPVASNSVRSRGASNDSTYILKRSYHQINDEAGYLSENEKEEGEDTMKPVLARRPKPVPKKSGTAQVHNLSERKRRDKFNKKMRALQELIPNCNKVDKAAMLDEAIEYMKTLQLQLQMMWMG…
CpbHLH015	evm.model.supercontig_489.6	+	306	evm.TU.supercontig_489.6	1	-0.5267	34690.2	4.4	5.42	921	2	MALSYCTTCWDSHQLLNSDMTTAMTSFQQFPFQDFQLPPDDLLASEYTHSSPSRLGSCNFIDPFLPDDPFHYSHQSSFPPEILELDCSFQYPKRQRTIHTNYYQPHIEQPSDLFNGYVPNPSSVPLPEFYSLHEIQPPPPLMELQVPALPSVFDTGKVVSDEDDDQNVRKAGNGVSLSAQSIAARERRRKITEKTQKLAKLIPGGHKMNTAEMFQAASKYVKYLQAQVGVLQLLSSLPQEELKPGKELQVLLSSPTIHEKLYWKEKCMVPGKLVEALADDHQIRTMHTINDEIDKLLQNPTCSSHD
CpbHLH016	evm.model.supercontig_57.85	-	396	evm.TU.supercontig_57.85	3	-0.7017	45150	1	6.09	1191	4	MERLQGPINSCFLEEHLDVEFLEQGFVNQENWRLEEEEELHLSIPSLEDKMPFLQMLQSVESSSFLPFKEPNFQTLLRLQHVKKPWELNPTLPDMDTQIQALEFESCVTHEIVDLDLPSPVKSETKDIQNPHSTSYVEGVSSVSNTNSGENYPREGNSGSSPPLTHPQIKPRDTHFPKSTPPITRERKKRKRTKTTKNKEEVESQRMTHIAVERNRRRQMNDHLNSLRSLMPPSYIQRGDQASIIGGAIDFVKELEQLLQSLETQKRMRKGEGSTDNSVCNSMTGISSNGLVVSRTQSGEEVKAENKSETADIEVTVIQNHVNMKIQCPRRHGQLLKAIVSLENLRLTVLHLNITTSQSRVHYSFNLKMEEECKLGSADEIASAVHQIFRYIIKGS
CpbHLH017	evm.model.supercontig_62.160	+	410	evm.TU.supercontig_62.160	6	-0.4977	45361.5	1.4	6.56	1233	7	MNRGGLLPQMLHCTDMTVLERQRARLKWQQDQLQPDQQQQESRFSDFNGLFSMPAQATQVQNFQGGVLAAHDPALADVVTRSVKPDPALLTGWTDLGKTVELRAGMEFLGPCAYSNYSGLEMNYSISRTSSCPPAVAAAVAMEAVEAKPKGSILSEKVSATTGRDSFKKRKVDKMLNAKIAAEDEGKEKKMKACAEEGDSKVTEQSNKKEKCGDTCKENSKACEGQKPDYIHVRARRGQATDSHSLAERVRREKISERMKYLQDLVPGCNRITGKAGMLDEIINYVQSLQRQVEFLSMKLAAVNPRLDFNIDNLFAKEACTSNFSTLGYVDFNPCGVEMGMNPGADMGLRRTISAPVETFLDSSCFTQIPSTWDVELQNVYNNITFDHQISFPPQPFTG…
CpbHLH018	evm.model.supercontig_489.5	-	224	evm.TU.supercontig_489.5	0	-0.4352	25033.3	7.2	5.38	675	1	MTGFQQVPFQDFQLPPDDLLASDCTHSSFSHLGSCNFIDPFLPDDPFHYSHQSSFPPEILELECSFQYPKRQRTIHTNYYQPHVEQPSDFFNGYVPNPSSVPLPELFSLHELPPPPPLMDLQVPAVPSFFDTGKVVGGDDDDDDQNVKKAGNGVSLSAQSIAARERRRKITEKTQKLAKLIPGGHKMNTAEMFQAASKYVKYLQAQVGVLQLLSSLPQVTIMQA
CpbHLH019	evm.model.supercontig_177.1	-	346	evm.TU.supercontig_177.1	3	-0.5722	39313.1	1	4.86	1041	4	MELNQQDYLEELLGLRRDTWDNSLTFTETNEDFFFSNNDWKNLSFDGFDTDLEAINLQNSFFTTEEFSGKVAGGDFCYSSFDLSTAAANSSDVPFADDNICGQQITNSSQNTFDTPPFHDTPPLQDTPPFHMQEDCNSFGLAEDLQACFQVESPPVFSIRRKNGRGKKMEGQPSKNLMAERRRRKRLNDRLSMLRSIVPNISKMDRTSILGDTIEYMKGLMERIKTLQQKIEEGGSDDQLNMVNIFRDVKKPNEILIRNSPKFVVERRSSDTRIELCCAGKPGLLLSTVHTLEALGLEIQKCVISCFNDFAMQASCSEEIEQRRAIGCEDIKQELFRNAGYGGRCL
CpbHLH020	evm.model.supercontig_8.199	-	604	evm.TU.supercontig_8.199	8	-0.6085	65816.3	1	7.03	1815	9	MRPPSSPSHPLPRLINPLESSRSLRRMNHYVPDFEIDDDYSIPLASGLPCPRKSSMADDDIMELLWHNGQVVMHSQTQRPPKKSPPSKYDEAVLPGNQSTVMEIQPPLLHNHQHHQHQHQQQQQSTTDHLFMQEDEMTSWLHYPLQDTNFEGDLCADLLYPSPCVTSTSTSASVPHPVRAAQVPAVATASRPPIAPARKTELETRVQNFAHFSRHKARVESVPSSSKSVVKELTVVDSSDTHAAAGPESGTSDAIRSTERASGGNSLCRTISGPAAVGTSSAAPGVNGGSSAGKEPLTCEGTVSSSPGCSSASADPPQKPAAEDRKRKGREMDDIESGHSEDVDFESADTKKQARGSTSTKRSRAAEVHNLSERRRRDRINEKMRALQELIPRCNKSDK…
CpbHLH021	evm.model.supercontig_55.64	+	320	evm.TU.supercontig_55.64	2	-0.3946	35946.7	4.4	6.8	963	3	MALEAVVFHHDPTYSYGGSRDLYSIAGGFCYPGGLDRKDEKPLCGENHNILMKEFHWEAPTFSSSPENNSAGRDGFQQLGPEEVLASATRCRRKRRRAKNVKNEEQVENQRMTHIAVERNRRRQMNEYLAVLRSMMPASFVQRGDQASIVGGAINFVKELEQLLQSLEGHEKMTEFHQASEININGGFSSSLFSDFFAFPQFSTSSSNPNKINNSSVSLSKSTAEKQLAIADVEVTMVETHVNLKILSRRQPKQLLKMIARLPSLGLTILHLNLTASQHMVLYSFSVKVEDDCQLGSVNEIAAAVYEMVVRIQEEAKFIN
CpbHLH022	evm.model.supercontig_6.255	-	152	evm.TU.supercontig_6.255	4	-1.0124	17725.9	1.1	5.24	459	5	MDQWNARDFSESVVAEFGPSTSMPSSNHAQNQNSMPERSRRRPEVEVKVEVKDPITARKVQKADREKLRRDQLNEQFLELANTLDPDRPKNDKATILTDTIQMLKDLTSEVNRLKVEYDALSEESRELMQEKNEIREEKASLKSELIHIQFL
CpbHLH023	evm.model.supercontig_19.156	-	247	evm.TU.supercontig_19.156	1	-0.3562	27194.9	1	9.1	744	2	MENSYFYHSAWPELTNFSDSNDGESRCLFPWSVPPCVSASPDSVQLHGCPSWSIPVEGVAEDKAASVSKSHSQAEKRRRDRINAQLATLRKLIPKSDKMDKAALLGSVIEQVKDLKRKATEASKALSVPTEVDEVTVDDCAADSKGSSESAFFRATLCCDDRPEVFSELIRVLKGLKMSIVRADISSVGGRMRSNLVMSTKGSVSMSTLRQSLNVFLSRIASSSVTSNCRIRSKRQRLFLPSNFSHQ
CpbHLH024	evm.model.supercontig_7.53	+	261	evm.TU.supercontig_7.53	1	-0.3873	28817.7	4.4	8.64	786	2	MAAFTFNANSSSGSDFTAFFNPFSYSLGGSKGVFKDESVSQSLGLDKERGELVKTPMRVGKKEASEAKALAVLKSHSEAERRRRERINAHLDTLRGLVPSTGKMDKATLLAEVISQVKELKKHALEASRGIPIPMDDDEVKVETCDEESKEGTFYFKASLCCDYRPELLIDLRQALGSLQLKVVKAEMSTLGSRLKHVFIFTSHKGHIDDANDRLVFADSVHRALSAVVDKASAMLEYSSRTTLPNKRQRISFFDSSSSSS
CpbHLH025	evm.model.supercontig_289.6	-	293	evm.TU.supercontig_289.6	7	-0.9781	32693	1	5.87	882	8	MRTEKGNPEEDEYEDEEFGSKKEGPSSNAPATAVNNNNNNKNKDGKNNDRANAMRSKHSVTEQRRRSKINERFQILRDLIPHSDQKKDTASFLLEVIEYVHYLQEKLQKYEGSYQGWSPEPTKLVPWRNSHWRVQNLVNHPQSIKNGSGPGSTYTGKFEENNITIAPSMLTGSQNPLEPDANRDVACKVMDRQPELASDCVPAHPLQRPVSDAQTSECVSSDSLSQEELNIEGGTINISSVYSQGVDLSQANISVQIDLGRRANRGMTSGTVSAKHATIEQLGVVRDEMRKAN
CpbHLH026	evm.model.supercontig_115.71	+	247	evm.TU.supercontig_115.71	4	-0.5659	28449.3	1	5.25	744	5	MENIDEEYTNWWETKRFYQNEEFEYDSAWGMDVPLSMYYDSSSPDGGASTAASKNIVSERNRRNKLRDRLFALRSVVPNISKMDKASIIKDAIDYIQELHEQERRIQTEIMELETGKLKRNNNPGFDYEQDLPVLLRPKKIKHQFYDCGGSKASPIENLELKVMFMAEKTAVVSLTCSRKTDTMVKLCEAFESLKLKIITANIVAFSGLLSKTVFIEAEEEEREHLRIKIETAIAALNDPQSPMSTQ
CpbHLH027	evm.model.supercontig_1024.1	-	511	evm.TU.supercontig_1024.1	2	-0.523	56000.7	5.5	5.58	1533	3	MLPRVTGVVWMEDREEGHSSSWRRNNEVTNTNCGMAESKDEITSVVTFKSMFDVGDDWYAANNSMHNHRDMRDVDFSSNLGDPDNLLLQPVDSSASCSPSSSMFNNLDPFQLHYFLSPKPTLPSFLNVAPNNPLENGIDLAEIAFLESQATNASSTLFNRGSGALSNFTDLISSSQITAPNMCSEPQFSTTRMLQLPEASAGFTGFRGFDENSGNTLFTNRSKLLRPLEEFPSTGAQPTIFQKRAALRKSLSDSGYNFGILGAGSDQLLNGKDRDEGKTEMGEKTMNMGNGYVLDDASVDGSGLNYDSDELVDHSKVEETGKNGGNSSNANSTVTGGDQKGKRKGMPAKNLMAERRRRKKLNDRLYMLRSVVPKISKMDRASILGDAIEYLKELQQKIR…
CpbHLH028	evm.TU.contig_28125.2	+	279	gevm.TU.contig_28125.2	3	-0.268	31279.4	1.1	4.71	840	4	MDSLQINEYELHDFLDDPNFDQFINLIRGEDEEPVGDGNVGTCFLDPPPAQIDFDFNIVGDTLVPSAGVVSGLDAPEEEDDSSTTINVVAARKTRMDRSRTLVSERKRRGRMKEKLYALRSLVPNITKMDKASIVGDAVLYVEDLQMQAKKLKADIANLEASLAGCHQSTESKDNNVKFAAYDKPPTKRIKQMDVFQVEVSEFYVRLVCQRGEGIAASLYKALESLTTFCIRNSNLVTVDDTFILTFTINVINCEQSLNLPNLKLWVTGALINQEFDFH
CpbHLH029	evm.model.supercontig_1.175	-	573	evm.TU.supercontig_1.175	7	-0.5756	61565.9	1.1	5.52	1722	8	MDMSEKDNFEVARGNDTNPMNYNSPTVASDWRFSSGNLSNTHMGLIPSDNPMAVCSSSCSASMVDSFGQNLWEHPPNSQSMGFCDINVQNNASTSNAMGISKGSPASLRSSIDRSLDMAWNPPSAMLKGSILLPSAPGMLPQSLAQFPADSAFIERAARFSCFNGGNFGDVVTPFGIPEAMGLYTRTAGMIQGPQDLFLGSELKSVSGGQFHKNQLNVGEPSKDASLTVERGPTEGSPLKNDRRSESIARSQDEAKQVVPGSGNESDEAEFCGGGGGGQDEPSGMEGTGGETSARCLSSKKRKRAGQFAWLTLKCLENEIDQSGGGQQPGETMKDNAENHQMCEKNPSSTPNKTTGKHGKQTSQASDPPKEEYIHVRARRGQATNSHSLAERVRREKIS…
CpbHLH030	evm.TU.contig_30708.1	+	428	gevm.TU.contig_30708.1	5	-0.5625	45304.3	0.8	6.04	1287	6	MQPCSREMQAMNSLLNQSHQIPLQEQQQQQQQQQQQHSQIQNPQFDSSSHDDFLEQMLSTLPSCSWGSDPATALKSSPWVDEPAPSDFHAAHFSDESAILASKLRQHQISGGSPAAAAAAAAKMMMQHHQQIMMMPLSLGAESHQNDVVDGSSSSSFKSPSNHQGGPMQQAQNFGAPSAVMNQTQPQIQPQASGSTGGASAQPRQRVRARRGQATDPHSIAERLRRERIAERMKALQELVPNANKTDKASMLDEIIDYVKFLQLQVKVLSMSRLGGAAAVAPLVADLSSEGGGDCIQGNGNGNGNGNGGTHARNNTASSNDSLTVTEHQVAKLMEEDMGSAMQYLQGKGLCLMPISLATAISTATCHSRGPMINNAAVPTNNNNPLLQSNGEGPSSPSM…
CpbHLH031	evm.TU.contig_45808.1	-	260	evm.TU.contig_45808	0	-0.6049	29023.5	20	6.24	783	1	MIFGRELSLGGSQSQSVSINFSPKVENDSGFALDSYDVQAVGSSQVYNNSSNGFRGDDSDVKLFPQLNQMISGGFNAPALVPNPELPKDESFSLPDERKPRKRGRKPANGREEPLNHVEAERQRREKLNQRFYALRAVVPNISKMDKASLLGDAITYITDLQMKIRVLETEREMVNNKQQLTVPEIDFQAQHEDAVVRLSSPLDAHPVSRVIKTFRDHQIAAQESNVSLSENNVIHTFSIRTQSGAAEQLKDQLVAAFSK
CpbHLH032	evm.model.supercontig_129.37	+	377	evm.TU.supercontig_129.37	3	-0.5081	42099.6	1.1	7.24	1134	4	MDLSSAKWLSDLGMDEYEIIHHCHMNSLAETLTTDVADITALNQVHSHGSFVKQSFSSESYSSYPTFNSANETSHNSSFERPAKQLKITACTTNSWNSTTTASKNDRVLPRASSSSSPTKTPHLLSFENSSSNHDHQQQFYHGNMMNCTVKPKDEAGLSPMRPPCLISNSGYCNDNTNHAGKVNQGMKRAYSKIQSHAQDHIVAERKRREKLSQRFIALSAIVPGLKKMDKASVLGDAIKYVKQLQERVKVLEEQTKKRTMESVVMVKKYQLSADDDSSSCDENFHGQCCDAALPEVEARVSDKDVLVRVHCENQKGILVKVLNEIEKIHLSILNSSVLPFGNSTLDITIIALKGDEFDMTVKDLVKDLRLALLKYM
CpbHLH033	evm.model.supercontig_52.97	-	334	evm.TU.supercontig_52.97	4	-0.2098	35400.4	4.4	7.07	1005	5	MASNNPNEAASDDFLEQILGLPNFASADTGLTGHDGGLGGTAASVPPMMLQLSSSDGSAHMTALTAGSGGAGAAAGFHTPVFPLGLSLEQGKGGFLKPEDASGSGKRFRDDVVDGRGSSVKNVFHGQPMPTTVPAAPHPPVMRPRVRARRGQATDPHSIAERLRREKIAERIRALQELVPSVNKTDRAAMLDEIVDYVKFLRLQVKVLSMSRLGGAGAVAPLVTDIPLSSVEVIDYKNIKMAVSPVIIRKLSLLFVKQDETGEGGRSQPAWEKWSNDGTERQVAKLMEENVGAAMQFLQSKALCIMPISLATAIYHAQPPDTSSLVKPEANPPP
CpbHLH034	evm.model.supercontig_282.7	+	254	evm.TU.supercontig_282.7	5	-0.8141	28850.4	1.1	6.72	765	6	MDMNMEMMKQFTEMNPGFLESISVSDYSGETFWAQQEQSEIPANWVHNNLSSSTFNSNTGHGGVLPVHRGTSSIIGDYFDQRKTRIVNEESTSNSQNKSSAKIAASSSTRKKNNLGKGKKSRSSEKEMEKSEEVIHVRAKRGQATDSHSIAERVRREKINKKMKCLQDLVPGCNKMMGMAVMLEEIINYVHSLQNQVEFLSMELAAACSPYDFNHTLESIRKAQGTNPHEAEEMEKWVKERYGEQNCFQPTWPL
CpbHLH035	evm.model.supercontig_53.118	-	346	evm.TU.supercontig_53.118	1	-0.5606	38193.1	1.2	6.06	1041	2	MCAKKEDDQGECSQAMIHNMQGFQEQLLLHQQQQGNDIYGITGTRAGAGGGFLFPHEVPPILPWSLPPVHSFNPTHFSPNQPGDHDPFLVPPPPPPPPISSYGSLFNRRAHGLQFAYDGTPSTDHLRIISEMVQPGGGPFGLQSELGKLTAQEIMDAKALAASKSHSEAERRRRERINNHLAKLRSLLPSTTKTDKASLLAEVIQHVKELKRQTSLIAETSPVPTEVDELTVDASDEDGKFIIKASLCCEDRSDLLPDLIKTLKALRLRTLKAEITTLGGRVKNVLFITGEDDSNDQQQQQQQQYCISSIQEALKAVMEKSSSDESSSGNVKRQRTNINIIEHRSL
CpbHLH036	evm.model.supercontig_36.191	-	320	evm.TU.supercontig_36.191	2	-0.308	35690.5	4.4	6.2	963	3	MALEAVVYSYYNPCKDFYSLLTEGGGYDQYLFQEEDKPLLGLHENSSFRDGKESWDHSLYSSPEVCTATVDQSVHGVSGGFSLMEPRVRPETAAAGGRRKRRRTKSTKNKEEIENQRMTHIAVERNRRKQMNEFLAVLRSLMPPSYVQRGDQASIIGGAINFVKELEQLLQSMEAHKRTSNGVSPAVPFADFFTFPQFSTCTAATECSAAVNSPCVSAKNAAEIEVSMIESHANVKILSKKRPRQLLTIVAEFQRLKLSILHLNVTTTFDEMVLYSISIKVEEGCQFNTADDIAAGVNNMLCRIQEEAALELSGRLITIS
CpbHLH037	evm.model.supercontig_65.63	+	326	evm.TU.supercontig_65.63	4	-0.4465	35500.8	1.9	6	981	5	MSQQAPFCEIRASSGDEVDGSSSNHGDGSIFPVSASPELNPLSQIFSSFTYCGAEADCFQDVWGSLPDYQLDSTAQNVLDNMPARDSGCEVNEGDSAGRKRGFDETGYRRCSSEEPNEVSRESKRRLNERPKRTRSAELHNISERRRRDRIKGKMRALQELIPNCNKLDRASMLDDAINYLKALKLQVEMLSTGGGTPCQFLHMSPAGIQSMQFPQFSPFVPLRQGLGLGMGLGFGTGMLGACFSTNLHPSLLATATRLPLISGCGEFPFSHMQNPFFHSQTLPEAAASSSSLQAFLAGFSPALNCSNKGDFVCQSEATGSINYKH
CpbHLH038	evm.model.supercontig_65.44	-	252	evm.TU.supercontig_65.44	6	-0.5031	28097	4.4	7.68	759	7	MADQFSELEFQTFKHCFKDTLNQTVLEEVTGSTHHHLRGSSMSFSHSTFLHSQLAQPTMTFTGGFGEERKNGKEAMGGVGQNLLLVNLCPPPGSATGLFTGNDSKGNSQGRKRKKKSEMDLQKPKEVIHVRAKRGQATDSHSLAERVRREKINERLRCLQDLVPGCYKTMGMAVMLDVIINYVQSLQNQIEFLSMKLSAASMYCDFNMMEMDSMETILQGASTYGLQEMEKMMKEGYGGGGGSSYLNSTWSF
CpbHLH039	evm.model.supercontig_4.112	+	360	evm.TU.supercontig_4.112	6	-0.6424	40010.1	4.4	6.75	1083	7	MASFPYQLHHPFLLDSLLCLPNTTCSSSPPPPPPSMKLYTNNLMDEDHSSCFSQFDPPQDSMKDTTPVIYDNSCVVLSDNEPSVTKKQSTDSSTVVDGDQVTQNLAPVLDKKRKTRNGSTLTSSGHHSKRVEYACTGLWLNQETGREGKSKRQKKCMSNGGEDRKEGKGEKKVADQQPPTGYIHVRARRGQATDSHSLAERVRREKISERMKILQKLVPGCDKVTGKALMLDEIINYVQSLQNQVEFLSMKLASLNPVFYDFGVDLDAFMVKPERMGCVQECSPTQITAFADATTTNFAPANNYSLLDASSPAFFIQQPQIRPHPQDNGNGLLWDAEEQRQKFLNPSGTGLANSNLCCFH
CpbHLH040	evm.model.supercontig_85.115	-	277	evm.TU.supercontig_85.115	5	-0.6281	30180.7	1.1	8.97	834	6	MDSSYELLAMDHQSQGKSISSNLIRQSSSPAGLFANLSAQNGYATMKSVGSYGGVNGTDGGGLSPSNRLKSLYSFSSRLPSSAMLSQISEIGSESIGANGHDDGKLGNGTGDARFYNPGFPSGGWHNSLSFTENFSGLKQENDNDGKLYSGSQDGESGNRIHMLSHSLSLPKASTEMVIEKFLQFQDSVPCKIRAKRGCATHPRSIAERVRRTRISERMRKLQELVPNMDKQTSTADMLDLAVEYIKDLQKQFKTLSDNRANCKCLNTQKPIPNQII
CpbHLH041	evm.model.supercontig_84.89	+	402	evm.TU.supercontig_84.89	5	-0.7969	45105.5	1	8.84	1209	6	MESDLHHRRHHLADHQPLYDQKPMNSGLTRYQSAPSSYFSSFSDRDFCEEFLNRPTSPETERIFARFLSATSGNTDNAILDQSFRDIRDSSSVKEPVREMEPQTQIMATIKTETEVLQKQNSYSSVSQSFYQTHQAQNQQQLPNQNSGSGMDYRMETTMRMDRLPPTKTGGGNSTPNLIRHSSSPAGLFANINIDNRFGVLRGMGDFGSGNKRESSFTSAIRPPSSSSGLMQTITEMGEKNMGGNSPENAGLYTVGSWDEVAILSDEIAGVKRIRDDDKALTKNVEAASMRPPLLAHHLSLPKSSAEISAIEKFFQDSVPCKIRAKRGCATHPRSIAERVRRTRISERMRKLQDLVPNMDKQTNTADMLDLAVDYIKDLQKQVKTLSDNRAKCLCSNKQ…
CpbHLH042	evm.model.supercontig_6.130	+	336	evm.TU.supercontig_6.130	5	-0.5636	37183	5.5	6.19	1011	6	MLQGLISPESFAGNGAVDLMVQERLKWQRQQQPQPATDVVGSQLSSIEFSSAPQFHGLLENVAGGRLFVQPKRQEAFLGSYELPKFGKFSVVGTDLVGGRVDFPASDCRVEAADMAMVMKKEEEKVEGEAFGSTEEQKFNKRKTEGVGREEYKEKRIKTEVETESSFKAKSSTDTETSKQNSTTSQAQKPDYIHVRARRGQATDSHSLAERARREKISKKMKCLQDLVPGCNRITGKAGMLDEIINYVQSLQRQVEFLSMKLAALNPSVEFNPSQQCTANCMLDVSMDFISAQTPPLESTSSSMTSLIFTGIDDFGLCHEQQRDLAGTGTKLVRGN
CpbHLH043	evm.model.supercontig_8.103	+	559	evm.TU.supercontig_8.103	7	-0.6235	60559.7	1.1	6.8	1680	8	MDSEFFLNAGIPPQPQLPSLHFEPTPSSSSMPTWNSFSPPIDQLNSVDCFFNPAWEKSTDHTLHFDSALSSLVSSPVASNSNVSTDSLLVRELIGKLGSIGKSGDISPHSQPLLGTTYINTPNSTNTSCYTTPLSSPPKLSLPMVKEKIPSLGKSMPLTSEFVADPGFAGRAARFSCFGSRSFNGRTAQLGLNNRDFANRSNPIMANGKLSRVSSSPSLKAIGSQPGNKTTSPSQDRPELANSQDESTISEQIPNGDSPPKVPNDLNSRKRKAASSKGKSKEPVASPSPNATKASEPNNDSNPKRSKQTESNGNVDSPVKTEEEAQPNTGDQKQNKTNNNTTKPPEPPKDYIHVRARRGQATDSHSLAERVRREKISERMKLLQDLVPGCNKVTGKALM…
CpbHLH044	evm.model.supercontig_160.32	-	401	evm.TU.supercontig_160.32	6	-0.6475	43318	30	5.62	1206	7	MGGCDNDDLGFRLGGESTMNCPSSGMNSTPIYTKPATGADPFFPSGWDPIISLSQHESFGGSTLVSHSELSNPPYPVMMQNQGIRGFAPQYPSGSGYTEMVPKLSCYGSGSFSEIVGSFSLPDQCGQLSNSVCPPNYLPSKEGGNEGTSTNVATSHDQDYQMSEADMAASTLNGKGRKRALESNSPLNPHKNAENELPNDPSGESSDVRNEQDEKRPKAEPSASPNLRGKQAAKQAKDNSNSGEAPKENYIHVRARRGQATNSHSLAERVRREKISERMRLLQELVPGCNKITGKAVMLDEIINYVQSLQQQVEFLSMKLATVNPELNIDIERILSKDILHSRGSNAALLGFGNITGSSHLYPHGIFQGTVPNIPTTNTQFPSLSHSALDNELQNFLSN…
CpbHLH045	evm.model.supercontig_3.225	+	562	evm.TU.supercontig_3.225	10	-0.7933	61577.6	1	8.64	1689	11	MELPQSRPFEVEGRKPTHDFLSLYSHSTVQQDPRPPSQGANYLKTHDFLQPLEQVGNTNTKEETGSEISTSEKPPPPAPPPPMEHILPGGIGTYSISHISYFNQRVPKPEGTAFPAAQASSNERNDENSNCSSYTGSGFTLWEESTLKKGKTGKENAGERPILREAAGKVAQWTTSERPSQSSSNNHRNSFSSLSSSRSSAQKSQSFMEMIKSAKGSTQEEDLDDDEEFVLKKEISTTQKGELRVKVDGKNTGDQKPNTPRSKHSATEQRRRSKINDRFQMLRELIPHSDQKRDKASFLLEVIEYIQFLQEKVQKYEGSYQGWNHEPAKLIPWKNNQRAAEGYVDQSRGIKSGSAPAVVFASKFDEKNVVVSPTVPLSMQNPIETDISTATTLKAMDHH…
CpbHLH046	evm.model.supercontig_142.14	+	349	evm.TU.supercontig_142.14	3	-0.5134	38330.6	1	5.07	1050	4	MESFGAFLEGDNPWEPEFMQYSTVFPLDDNEFFSISSFCSVPQIPNMSFINGDSTTLFGSMNSTASGLSSGSEESSYGSYCTDIVQNNFTAHNHVAVTNDVPDSVYSMDFVGFDEKNKSILCVVPEMIMEDTGCAEEDLGGKKIAGANLVDSQPPYDAVLANQLQLKQKFSPEIHPVTRNGIVSAESTKKRTRVSGHAEESGKSDKRKKKYQKVSQNRSSYEESINGGLDGQSSSGCSSEDENTSEAKATSSAANVNGKTRASRGTATDPQSLYARKRRERINERLKILQNLVPNGTKVDISTMLEEAVHYVKFLQLQIKLLSSDDLWMYAPIAYNGIDIGLHQKISLL
CpbHLH047	evm.model.supercontig_200.36	+	295	evm.TU.supercontig_200.36	1	-0.7599	33396	1	6.13	885	2	MEKDDWDVSGFLWETENQLWDFFNFDFSAVETQIKYPMDPPPPPPPPPCFTSNLSLNPPTVPSPDLDQPQTAAPAAAAAALEKEKGKKVIGVDEKKEKEKGKKEGKTEANHESHLWTERERRKKMKNMFDNLHGLMLTNPRGMMRHVPQKADKITIVDEAVTWIKGLQQDVQKLEARKELEKRKRESQDPITAHKLAMDSTQPTLIDQPSYGNNNNNNNIVPEFTNPTPVGFKVWFSENLNLNICGDEAQISLCSVKKQGLFTAICSVLEKHKLELLSASVPSDSNRRMTMMQVS
CpbHLH048	evm.model.supercontig_44.78	+	221	evm.TU.supercontig_44.78	4	-0.7316	25001.2	1	5.42	666	5	MEALDEADCWDFLDYNIIGDNTSPDLFCFNDTGGAEFDFSSGVVLQEKEGEQKECTRKRGRTGSCSRPGTKACRERLRRERLNDRFLDLSSVLEPGRPAKTDKPAILDDAIRVLNQLRAESQELKETNEKLVEEIKSLKAEKNELREEKLVLKADKEKIEQQLKAMVVPSAGFMPTHPAAYHASANKMAVFPSYGFIPMWQYLPPSSRDTSHDHELRPPAA
CpbHLH049	evm.model.supercontig_8.253	-	347	evm.TU.supercontig_8.253	0	-0.3204	38318	1	6.04	1044	1	MEMRDIKPVLTADHHLTASASSSPALPFFPGENVSDDSTFFSSPDSTILQPLIPLPYEYFSTSLSPNFYADDYPPLAYDTPAHHFLQFPDNFSSSSCSALTSPLYLDSQAAFDSNINLLDFFSKPAPDLFCNPGTSSSFTHLPHLHSIEHAQLNHSSSSSSARNKRARFDYAAASSSQSLDSILQSNFNFQSYTSAPPSVTPSNELPRQRRPRISDKTRSLQKLMPSDKKMDTATLLEDAYKYVEFLQAQIKALQWMPVGSSFSGTGGGALTEVGAGVNNNVLGSLETLNRQQLLQVMVNSPVAQTMLYSKGFCVFSHEQLLLLRRIAQKKTSLLEQMLFDPSKSCR
CpbHLH050	evm.model.supercontig_106.57	-	387	evm.TU.supercontig_106.57	4	-0.687	41978.3	1	5.14	1164	5	MESMGAIAEGEWSSLSGMYTTEEADFLAQLLGTCAGEGDPMNMVAGHGGSRMSMAGFEEAAAIHGTSFCFNTNFNGGSNNSSVVFPSSSSSSSMNEGFYMPILANSFGSSGSMPMEFCMGDQENNDNNNIDGNSNFYLIDQADNHDWLNLEIMSCDHGNADEITPISSGKNNGQPLLDDKRSQQKSESQIMIVPPHNTNNPTQNSKKRTRVPADAQKSKRNVRVKKEKNQKSSVSTASDKEEDINGGGNNNYKQSSSSCCSEEDDSNGSSQEINGGTTTSSLSSKGKAALNVNGKTRANRGAATDPQSLYARKRRERINERLRILQSLVPNGTKVDISTMLEEAVHYVKFLQLQIKLLSSDDLWMYAPIAYNGMDIGLDLKITSTLR
CpbHLH051	evm.model.supercontig_5.303	+	270	evm.TU.supercontig_5.303	5	-0.7314	29593.9	0.8	5.85	813	6	MQFGLGLESGMDPGGMMNEGPYNLAEIWQYSMNGGGDLGIKRGPFGSTLAHFVDANRDTSTNDPVCLDQRPALAAAGARKRRDIEDESAKVVSTSGGNGVNDSDGKRLKSSGCRDESRDAKTEVEPCSGKPVEQNSQPPEPQKDYIHVRARRGQATDSHSLAERARREKISERMKILQDLVPGCNKVIGKALVLDEIINYIQSLQRQVEFLSMKLEAVNSRMNHGIEFGQQAFETGGLAFGSQATREYSRGTSPEWLHMHVGGGFEEQHN
CpbHLH052	evm.TU.contig_27490.2	+	314	evm.TU.contig_27490	4	-0.5833	34670.6	20	5.62	945	5	MPLARDYMGSVQPCDFTGDYSSPETCVFEEGDRVPDKTSLASKSFTMSNSPPNSRPTSTVSSTGFVLTAADHHFEPEGSLINFRTGYDAFMVGNGSLLSFGERAGYPKTSSEYSGWEGEFNQSYHWNQINPKSSSDLRLVDDFNCFETAGNLYSEAKESHGDHWLYSEATIVTADSIQESASPEVVACLKRPHMEESMQALKKQCSSSSTSRKAKIKSSPSKDPQSIAAKNRRERISERLKILQELVPNGSKVDLVTMLEKAISYVKFLQLQVKVLATDEFWPVQGGKAPDISQVKEAIDAILSSQKDRNSSSK
CpbHLH053	evm.TU.contig_45766.1	+	100	evm.TU.contig_45766	3	-0.6229	11524.6	4.4	10.08	303	4	MAVIEKFLHFQGSVPCKIRAKRGFATHPRSIAERVRRTRISERMKKLQELFPSLDKQTNTADMLDMAVEHIKDLQKQVKKLTDTKARCTCKEKPLSNLSA
CpbHLH054	evm.model.supercontig_120.27	-	167	evm.TU.supercontig_120.27	0	-0.643	18835.1	1.1	7.8	504	1	MDQDYYFSATYHNPNSSSSSGSVSSSVTNKEKKKGGMKKSKGVKLSTDPQSVAARERRHRISDRFKILQSMVPGGTKMDTVSMLDEAIQYVKFLKTQIWIHQNMINWVDLDDPSFLVNNASLHPHQNIYANPDLDPLVQYSSQLAPLPDSCFQTHPNISNYDACINH
CpbHLH055	evm.model.supercontig_55.51	-	219	evm.TU.supercontig_55.51	1	-0.3848	24539.7	1	10.36	660	2	MRQSASHYPPRTYTMRSSLFHGRVSNNAKQCSFLNGILSTKPAISKAEALAIAAKKHSEAERRRRFRINSQFAALRTILPNLTKMDKASVLGEAIQQVTQLKKTVKELELDSCGKSKRLFPCEQDSLNLKYCNKEKTLVKIAFSCEDRLALISNITEALKSTKGKILRAEMVIVGGRARHVLWIQGFLGNEGIVRLKRMLRAIMDSPSSPGNSKHRVSN
CpbHLH056	evm.model.supercontig_3.503	+	282	evm.TU.supercontig_3.503	5	-0.4811	31099.9	4.4	6.35	849	6	MAGFSADLQSFRSSSFPFMETDNPNVESVNQFAGLNPSSTAIADASNLVNFQSFLPFSAEALFGNQAPDFPPTFPENFLGIFQDSNQNAVMPIVSQPCVAPRITFNNHETKKRKSMEVVSESSSGISAPSPPVSDSGSKRKQSSGRGKRVKSNEDEKSKEVVHVRARRGQATDSHSLAERVRRGKINERLRCLQDIVPGCYKTMGMAMMLDEIINYVQSLQNQVEFLSMKLTAASTFYDFNSESDAIETMQRAKAEESREIVRLMKEGGFNGVGNLSSSWPL
CpbHLH057	evm.model.supercontig_20.63	+	348	evm.TU.supercontig_20.63	3	-0.3924	39211.8	1	8.35	1047	4	MEKSSSSGLFELGIEDCGFIHQWQMNPLDELSILPSTAAFEENLQQYSCTFQAFNLRPSANTYNNGIDRPSKQLKSNNWNSSKPYLTSIPQAAVSQNSATLSFANANNQVMSFMKPKEEAAICAENIHILPADILASQGSFRKQNHAFKACQGSSNKSSTNTARLSQTQDHIMAERKRREKLSQRFIALSAIIPGLKKMDKASVLGDAIKYLKQLQERVKILEEDTRKKTIESVIFVKKSQLSMESDQNSFSDENFSSCPYDEPLPEIEVRFCDKNVLIRIHCEKRKGVLEKTIAEVEKIHLTIINSSLMTFGSSALDVTIIAQMDVEFKMSVKDLVKHLRSVFELLK
CpbHLH058	evm.model.supercontig_97.78	-	181	evm.TU.supercontig_97.78	3	-0.5607	20014.2	4.4	9.59	546	4	MALYLSQQLVPPPWGRSESCSGSSSKACREKLRRDRLNDKFMELGSILEPGRPPKTDKAAILIDAVRIVTQLRGEAQKLKEANSSLQEKIKGLKTEKNELRDEKQRLKAEKEKLEQQLKTMNSQPSFLPAPAIPAAFAAQGQAPGNKLVPFIGYPGVAMWQFMPPAAVDTSQDHVLRPPVA
CpbHLH059	evm.model.supercontig_21.177	+	290	evm.TU.supercontig_21.177	2	-0.514	32066.2	1.9	6.63	873	3	MSALTTTPYGSSVSDDNFLGGVGDKLAGQEANSTSNSVSVMEKEGVEEAPMDRKRTGKGSMASGKSRVNGAAAENSTGERGCESEHEVHIWTERERRKKMKNMFSSIQALLPDLPPKADKSTIVDEAVSYIKRLQHSLQTLQKRKQEKLTGSIATLMTDHFETSMVTPEVQKAMPEHYSKEALLADHQAQSSDNNLIGISDMANRFPQCLPATNCFQFRTWFSPNVVINMNGNDAHFSICSVKKPGLLSTLSYILQKHNLEVVSAQVSSTQYHCMYMIHAHLKHDISDIT
CpbHLH060	evm.model.supercontig_21.176	+	340	evm.TU.supercontig_21.176	5	-0.4405	36376.6	4.4	5.26	1023	6	MADLYGAAPSSTAPPEPEEISTFITQFLNTSSSSSSAHCMPFKPKYVHSFSSPPPPAANPGPLLMEDRRWFAGSMGLPESECRVREGNSGAVVDTSSSGINFSDPQGYLGTNVKERTENTFSSVAHLSCDTEGPDVSELPANRVPARTSSKRSRAAEVHNLSEKRRRSRINEKMKALQNLIPNSNKTDKASMLDEAIEYLKQLQLQVQMLSMRNGLSLYPVCLPGVLQPMQLPPTGMGYHDDGGLLNSAPGAGTISANEESSVQTAYILPSQCASSSQSIAIPSVTNINALETSFGFEPSIQANYGPFNLTPTSEEICKEGKLELPLDANRAGNSSSGVS
CpbHLH061	evm.model.supercontig_21.7	-	219	evm.TU.supercontig_21.7	1	-0.7346	24275.5	1	9.27	660	2	MEMDPFRSSCYCEYGRNDDVSVASSEKKSTTEACKSHKEAERRRRQRINAHLSTLRSLLPDTTKTDKATLLAEVVHHVRELKRKAADVARRNLDGNGLEPDPSTWPFPGELDEATLSNCDGGATGLVKATLCCEDRPGLNRDLGRAFRSCRAKPVRADMMTVGGRIKSVVVTQWAGNGEKEIEALKRALREVVENRVPGSGMPRYDKRARICGSFGNRG
CpbHLH062	evm.model.supercontig_70.77	-	550	evm.TU.supercontig_70.77	3	-0.5821	59672.4	100	5.16	1653	4	MVLGTANGVVWVEDGDHPEDDAVSWTRNENNSCNNNHNNNNNGEEHREDDMAMGGGVATFKSMLDGDWYMNPPHQEDLHGLQNHPEIRELGGFCSNPADNLLLQQPIDSSSSCSPSQAFTLDPLQSQPVLPSKPCLSSLINVFCNNPFENGFDFGSESGFLGQFHGNQSPNLVGFAGLSSQTQMGTPELSPNSDLQATRLLPLTENGGTLGGSSGFSPTGFEGFDSSNNALFMNRGKVLRPLEVFPSTGAQPTLFQKRAAMRQNSDGKLENLEVSGLRFGDVATGIGGNWGRGEPEVDRKRKRSSEGEIEEGSFDASGLNYDSDELNDSSKLEENARNGGSNSNANSAIAGGDQKGKKKGLPAKNLMAERRRRKKLNDRLYMLRSVVPKISKMDRASIL…
CpbHLH063	evm.model.supercontig_212.3	-	205	evm.TU.supercontig_212.3	3	-0.5165	23232.4	1.4	9.91	618	4	MNGKLKFLAILQRDTCDEEEKKLKARGKSSASTKRSRAAAIHNQSERKRRDKINQRMKTLQKLVPNSSKTDKASMLDEVIEYLKQLQAQVHMMSRMSMSPMMMPMTMQQQLQMSMMTPMGLGMGMGMMDITRPNIPPVLPNPFIPIMPWDPSLERSQPASTPIVPDPLSAFLSCHSQPMSMDVYGRMAAMYQQLLQQPPISNSKT
CpbHLH064	evm.model.supercontig_49.31	-	255	evm.TU.supercontig_49.31	0	-0.5023	28093.1	1	7.92	768	1	MEIDPLKSAAEGQMEMMMMTMMQMDKVSDFLGAYNDLAHELPTTDLPGATPTNNSINNMLHFADNPDHPASPTNSFLNIPHSGIPVAGGSPVQDPSAPAFLSTGRWRETAGDLSGEENKRNSMAAMREMIFRIAAMQPIHIDPESVKPPKRRNVKISKDPQSVAARHRRERISERIRILQRLVPGGTKMDTASMLDEAIHYVKFLKTQVQSLERAAANNRSPPGIGFPVPISNAATYAPLQLRKLCQPSQHYGDA
CpbHLH065	evm.model.supercontig_537.2	+	634	evm.TU.supercontig_537.2	6	-0.4173	70941.5	4.4	5.89	1905	7	MATGVLNQEKMPENLRKQLALAVRSIQWSYAIFWSISARQPGVLEWGDGYYNGDIKTRKTIQAVEQNADQLGLRRSEQLRELYDFLSAGENGQQARRPSAALSPEDLSDTEWYYLVCMSFVFNIGQGLPGRTLTSGQPTWLCNAHFADSKMFSRSLLAKTVVCFPFLGGVVELGVTDLVMDDPDLIQHVKSSILEIPCSIVSNKSNSGTRNARNDNDIAHAVVKPQILDDKLIPVIEGGELQMASPDNSSDGFEAGQPGEDSLMIERINGGASQVQSWHLIEEEFSNCVHHSLNSSDCISQTFVEPAKVVCVSGSEKEISHCLQDIQEYNHTKLTSLALRGDDLHYQGVLAALLKTSHHLILGPLFRNSDQESSFISWKRGLVKSQRPKEGTPQRLLKK…
CpbHLH066	evm.model.supercontig_20.95	+	626	evm.TU.supercontig_20.95	7	-0.7533	71181.7	1.4	5.49	1881	8	MNVVLENLVRRLRPLVGSKAWDYCVVWKLSENQRFIEWVGCCCGGSERININEDGVEEGLLHCHGQSQVLSCRDVMVDHPNSKSCELLSQLPSSIPLTDSGIHAQTLISNRPSWLFSHNSDSDHSIEVIKETVGTRVFVPVIGGLIELFVTKQVYEDQNVIDFIISQCNISTEQETLIMNSRNMDSNFQVTISNLQYSLDELESKPFLPNDQNDHDDPNDMNHHVHQQPVSSATENSILTGLAACENISIDRLHLCSPDPMDLLQQFNYSNSDHKMSDAAAAFFEVHDDQSSFASDKAMINIHPFKLDDNNKLQDNFDHHDTSTTKDHHHHHHHQHHQQGNEIKQENGRSDSISDCSDQNDDEDIDAKNRRGNGKGHQAKNLVAERKRRKKLNDRLYAL…
CpbHLH067	evm.model.supercontig_141.19	-	495	evm.TU.supercontig_141.19	0	-0.5161	54853.6	1.1	5.66	1488	1	MDELIISPSSSSSLVSFSQEPTTALQQRLQFIVQTQPESWAYAIFWQTLNDDNGRIYLGWGDGHFQGAKENNTSTNTNHHLFHTHRRKDVMKGIQALLGDTHNDMINVSMMDGSDVTDVEWFYVMSLTRSFPAGDGGPGKALTTGSLVWLTGGHELQLYSCDRAKEANMHGIETLVFVPTSNGVLELGSSDLIRENWSLVQQVKSLFASDLITLVSKQPSPNPTPIPFLDRNISFADIGIIAGVQEEDASPKDRDNKEPRKDSSPAKPGQSSFVDSENSDSDCPLMNNVGPIVEKKLHKKRGRKPGLGRETPLNHVEAERQRREKLNHRFYALRAVVPNVSRMDKASLLSDAVYYINELKGKIEELESQLQKESKKVKLEMADNLETQSTTTSVDQTKS…
CpbHLH068	evm.model.supercontig_52.26	+	679	evm.TU.supercontig_52.26	6	-0.5827	75898.9	4.4	5.37	2040	7	MAAPVASQLQSTLQAAVQSVQWTYCLFWQFCPQQGILVWADGYYNGAIKTRKTVQPMEVTAEEASLQRSQQLRELYESLSIGDTNQPTKRPCAALSPEDLTETEWFYLMCVSFSFPPGLGLPGKAYARRQHVWLTGTNEVDSKTFSRAILAKRAAGYNILLQTVVCIPLLDGVVELGTVDKVQEDVRFVEHVKSFFSDHLHQQKNVQQPKPALSEHSTSNPPSSDHHHFHSPLVPGIYLSAAQAVQVDDEVDEDDDEEEDDEEEEEPESDSADIGHTSRSIGPDKTQSVAAAEQSELMQLDLSEDIRLGSPDDASNNLDSDFHMLAVSQSPADQQRRSDSLRAESCQRWSPVLQEPLNGSRVQPPSGEDMTQEDSHYSQTVSTILLSQSTWWAESTSNV…
CpbHLH069	evm.model.supercontig_92.83	-	237	evm.TU.supercontig_92.83	1	-0.4404	26424.9	0.8	8.18	714	2	MQPAENSELYQFLTENGVGSYGFLQNCGEYSAAMSSFCGSTSSFYPLDLSGISDTTPQDRALAALKNHKEAEKRRRERINSHLNKLRTLLPCNSKTDKASLLAKVVQRVKELKQQTNEISGLESFPSETDEISVLSGECSSDGRLIFKASLCCEDRSDLLPELIEILKSLHLKTLRAEIATLGGRIRNVLVVAADKDHSSVESVHFLQNALKSLLERSTSNDRSKRRRALDHHKIFV
CpbHLH070	evm.model.supercontig_71.72	+	654	evm.TU.supercontig_71.72	0	-0.6279	71216.9	1.4	5.41	1965	2	MNLWTDDNASVMEAFMSSDLSALWPPPQSSASTSTPAPDAAKSLSQTQLSSVSVFNQETLQQRLQALIEGARESWTYAIFWQSSYDYSGASVLGWGDGYYKGEEDKAKSKSKSSSTPSSLAEQEHRKKVLRELNSLISGPAATSDDAVDEEVTDTEWFFLVSMTQSFVNGSGLPGQALFNSQPVWVAGSERLATSGCERARQGQVFGLQTMVCIPSANGVVELGSTELIIQSSDLMNKVRVLFNFSGVDAGPWSMSSNPDQGENDPSLWISEPAGGIEIKDSLHGGNSNSSGPGNSNNHQQISKNIQFENPSSSSLTENPSAIHTQNHQPTQQIQTQNYISRELNFSQGGYVGNGDSNMLRPESGEILNFGESKRSSSNANGNLFSGQPSVVTEENKKK…
CpbHLH071	evm.model.supercontig_1892.1	+	475	evm.TU.supercontig_1892.1	0	-0.3845	53133.9	1	5.82	1428	1	MEDLVSSASLSSLMSVCQESSPTNTTTLQQRLQFIVQSRPEWWVYSIFWQACKDANGQLSLSWGDGFFRGTKASKKLSKQNRFGFNLERKKLSREIHALFTEEMEMDRLEEDGDVTDYEWYYTVSSVGRTFGVEDGGILGRSFSCGTFLWLTGDHELQLYDQCERVREARAHRIQTLVCVATPCGVVEFGSSDMIKEDWGMVQLAKSLFANSDIPSFLSCRQNEAEQQLIDHLPASRIISPFLGTAILPATTTTTGEIKKEVTIGLGRSSSDSGPSDSDGHFNVQVKKRGRKPVNGCSDSPLNHVEAERQRRERLNNRFYALRSVVPNVSKMDKASLLSDAVTYIKELKAKIGELEAKLQAQSQNRGAARLCYDNQSTTSSTGDYARAAGQSYGTSTEV…
CpbHLH072	evm.model.supercontig_1213.3	-	391	evm.TU.supercontig_1213.3	4	-0.5769	43155	5.5	8.62	1176	5	MLKFRSNYEVAELTWENGQLAMHGLLPPTKPTWVRSNGTLESIVHQAAFHDHQLPPPNIIPSMVASSGTARYEESSGQVPVVTKKRTRSESGTCLRKNFEEDDGRLMQCASASGTFGRDDHDTTMMTWASYESPRSLKMKVTDDDSACHDGSGNQDEDRETREVTGRSSLSRRNIRAAATHNESERRRRDRINQKMKTLQKLVPNASKTDKASMLDEVIDYLKQLQAQVQMMSMRSMPQMMMQQQLHMSMLARMGMAAAAGVGLAMDINPMVTAGTPFPHPAAALPSLLHPPHVAAAVASAAPTFLPPTPFAMPTAPLLRPVDQPNINQDANNNASSVPIMAAPYSSFLAQQSMNMEMYNKMAAMYRQQMNQTTQRTGCPAQSSRVQGSDN
CpbHLH073	evm.model.supercontig_69.52	-	666	evm.TU.supercontig_69.52	9	-0.4921	75228.7	1.9	8.86	2001	10	MSSQPQQQGQQPLLVYPNTVTRPPPSSLLSSSSSHSNGSFGTVFIVLAVIVVISAIACFLGRLCNRRSHKNQHKQQQQQQKKPPKQTQNFPHKEWEPRQNRDLEFGLEKKINPVPRQAAGGKNNRDLEFGFDHKRIPSGKPGVRINGDPRGFKVQENGEIRGEFRHVKIQLECRIVYTSLVLHSLITHLLWETQTYFCDIQGDMRSMKIAVEWLRPCIENLAWDYCVVWKLGDEHSRFIEWVGCCCSGGARVKVERGKQELVGLCRDERDNNRVESLRLYCLVTGSGYSWETTGTRVLIPVLGGLIELFAAKNTPKDVKIIELITSLYDASSEQEMTAQSYMTLGEDLDPPAEANLQNLQPVLRLPTLIPKTQVLTQVTQSHIYPSFDGSSSSSHPPSK…
	Minimum		100		0	-1.0125	11524.6	0.8	4.71	303	1
	Maximum		679		10	-0.2098	75898.9	100	11.07	2040	11
	Average		356.959		3.52055	-0.567662	39528	6.00137	6.82493	1073.75	5
