# Supplementary material for: Genome-wide analysis of basic helix-loop-helix transcription factors in papaya (Carica papaya L.)
Source: PeerJ. 2020 Jul 3;8:e9319. doi: 10.7717/peerj.9319 (PMC7341539; doi:10.7717/peerj.9319)
Supplement: Supplemental Information 4 [file peerj-08-9319-s004.xlsx]

## Sheet: Sheet1
			Gene name
Classification	Elements	Function	CpbHLH001	CpbHLH002	CpbHLH003	CpbHLH004	CpbHLH005	CpbHLH006	CpbHLH007	CpbHLH008	CpbHLH009	CpbHLH010	CpbHLH011	CpbHLH012	CpbHLH013	CpbHLH014	CpbHLH015	CpbHLH016	CpbHLH017	CpbHLH018	CpbHLH019	CpbHLH020	CpbHLH021	CpbHLH022	CpbHLH023	CpbHLH024	CpbHLH025	CpbHLH026	CpbHLH027	CpbHLH028	CpbHLH029	CpbHLH030	CpbHLH031	CpbHLH032	CpbHLH033	CpbHLH034	CpbHLH035	CpbHLH036	CpbHLH037	CpbHLH038	CpbHLH039	CpbHLH040	CpbHLH041	CpbHLH042	CpbHLH043	CpbHLH044	CpbHLH045	CpbHLH046	CpbHLH047
light	AE-box	part of a module for light response	0	1	3	1	0	1	1	0	0	0	0	0	0	1	0	1	2	0	0	0	0	0	0	0	0	0	0	0	1	0	0	0	1	1	0	0	0	0	0	1	2	0	3	0	0	0	0
	G-Box	cis-acting regulatory element involved in light responsiveness	1	1	1	0	0	1	0	2	0	0	2	1	0	0	0	0	2	0	0	0	0	1	0	0	3	2	1	0	0	0	0	1	3	0	2	1	0	0	1	1	0	1	0	1	2	1	0
	G-box	cis-acting regulatory element involved in light responsiveness	1	0	0	1	0	2	0	4	0	2	4	1	2	2	0	0	7	0	0	1	4	2	1	2	4	4	3	1	0	0	0	3	3	0	1	3	2	0	2	1	2	0	5	2	2	0	3
	GA-motif	part of a light responsive element	0	0	0	0	0	0	1	0	0	0	0	0	0	1	0	0	0	0	0	0	0	0	1	0	0	0	0	0	1	0	0	0	0	0	0	0	1	0	0	0	0	0	0	0	3	0	0
	GT1-motif	light responsive element	1	0	0	2	2	1	1	2	1	2	3	0	2	0	2	1	0	0	3	0	0	1	0	1	0	2	2	0	0	0	0	1	1	1	2	2	0	0	1	1	2	5	6	2	2	0	2
	I-box	part of a light responsive element	0	2	0	0	1	0	1	1	1	0	0	0	0	0	0	1	0	0	0	1	0	1	0	0	0	0	0	0	1	0	0	0	0	0	1	0	2	0	0	0	1	0	0	0	0	1	0
	4cl-CMA2b	light responsive element	0	0	0	0	0	0	0	0	0	0	0	0	0	0	0	0	0	0	0	0	0	0	0	0	0	0	0	0	0	0	0	0	0	0	0	0	0	0	0	0	0	0	0	0	0	0	0
	TCT-motif	part of a light responsive element	0	0	0	0	0	1	2	3	2	0	3	1	1	0	1	2	1	0	2	0	1	0	1	3	1	1	0	1	1	0	0	1	1	3	2	0	0	0	0	0	0	1	1	0	1	0	0
	ACE	cis-acting element involved in light responsiveness	0	0	0	3	0	0	0	0	1	0	0	0	0	0	0	0	1	0	0	0	0	0	1	0	1	0	0	0	0	0	0	0	0	0	0	0	1	1	0	0	0	0	0	0	0	0	0
	GA-motif	part of a light responsive element	0	0	0	0	0	0	1	0	0	0	0	0	0	1	0	0	0	0	0	0	0	0	1	0	0	0	0	0	1	0	0	0	0	0	0	0	1	0	0	0	0	0	0	0	3	0	0
	GATA-motif	part of a light responsive element	0	1	1	1	1	0	2	0	2	0	1	2	1	1	1	1	0	1	0	2	1	0	0	1	0	2	0	0	0	0	0	0	0	0	0	0	1	0	1	1	0	1	0	1	0	0	0
	Sp1	light responsive element	0	0	0	0	0	1	0	1	0	0	0	0	0	1	0	0	0	0	0	0	0	0	0	1	0	0	0	0	0	0	0	0	0	0	0	0	0	0	0	0	1	0	0	0	0	0	0
	TCCC-motif	part of a light responsive element	0	0	0	1	1	0	0	0	1	1	0	0	0	0	3	1	2	0	0	1	0	0	1	0	0	0	1	1	1	0	0	0	1	2	1	0	0	0	0	0	0	1	0	0	0	0	0
	AT1-motif	part of a light responsive module	0	0	0	0	0	0	0	0	1	0	0	1	0	0	0	0	0	0	0	0	0	0	0	1	0	0	0	1	0	0	0	0	1	0	1	1	0	0	0	1	0	1	0	0	2	3	0
	chs-CMA2a	part of a light responsive element	0	0	0	0	0	0	0	0	0	0	0	0	0	0	0	0	0	0	0	0	0	0	0	0	0	0	0	0	0	0	0	0	0	0	0	0	0	0	0	0	0	1	0	0	0	0	0
	Box II	part of a light responsive element	0	0	0	0	0	0	0	0	0	0	0	0	0	0	0	0	1	0	0	0	0	0	0	0	0	2	0	1	0	0	0	0	0	0	0	0	0	0	0	0	1	0	0	1	0	0	0
	C-box	cis-acting regulatory element involved in light responsiveness	0	0	0	0	0	0	0	0	0	0	0	0	0	0	0	0	0	0	0	0	0	0	0	0	0	0	0	0	0	0	0	0	0	0	0	0	0	0	0	0	0	0	0	0	0	0	0
	L-box	part of a light responsive element	0	0	0	0	0	0	0	0	0	0	0	0	0	0	0	0	0	0	0	0	0	0	0	0	0	0	0	0	0	0	0	0	0	0	0	0	0	0	0	0	1	0	0	0	0	0	0
	Box 4	part of a conserved DNA module involved in light responsiveness	3	7	6	3	0	0	6	0	7	7	4	7	0	5	1	3	9	0	4	9	3	2	1	1	6	4	0	7	7	1	0	13	11	0	10	6	7	7	7	4	2	4	5	2	4	6	11
	ATCT-motif	part of a conserved DNA module involved in light responsiveness	0	0	0	0	0	0	0	0	0	0	0	0	1	0	0	0	1	0	0	0	0	1	0	0	0	0	0	0	0	0	0	1	0	0	0	1	0	0	0	1	1	1	0	0	0	1	0
	GTGGC-motif	part of a light responsive element	0	0	0	0	0	0	0	0	0	0	0	0	0	0	0	0	1	0	0	0	0	0	0	0	0	0	0	0	0	0	0	0	0	0	0	0	0	0	0	0	0	1	0	0	0	0	0
	ATC-motif	part of a conserved DNA module involved in light responsiveness	0	1	0	0	0	0	0	0	0	0	1	0	0	0	0	0	0	0	0	0	0	0	0	0	0	0	0	0	1	0	0	0	0	0	0	0	0	0	0	0	0	0	0	1	0	0	0
	3-AF1 binding site	light responsive element	0	0	0	1	0	0	0	0	1	0	0	0	0	0	0	0	0	0	0	0	0	0	0	0	0	0	0	0	0	0	0	0	0	0	0	0	0	0	0	0	1	0	0	0	0	0	0
	chs-Unit 1 m1	part of a light responsive element	0	0	0	0	0	0	0	0	0	0	0	0	0	0	0	0	0	0	0	0	0	0	0	0	0	0	0	0	0	0	0	0	0	0	0	0	0	0	0	0	0	0	0	1	0	0	0
	LAMP-element	part of a light responsive element	0	1	0	0	1	0	0	0	0	0	0	0	0	0	0	0	0	0	0	0	0	1	0	0	0	0	0	0	0	0	0	0	0	0	0	0	1	0	1	1	0	0	0	0	0	0	0
	AAAC-motif	light responsive element	0	0	0	0	0	0	0	0	0	0	0	0	0	0	0	0	0	0	0	0	0	0	0	0	0	0	0	0	0	0	0	0	0	1	0	0	0	0	0	0	1	0	0	0	0	0	0
	P-box	gibberellin-responsive element and part of a light responsive element	0	0	0	0	0	0	0	0	0	0	0	0	0	0	0	0	0	0	0	0	0	0	0	0	0	0	0	0	1	0	0	0	0	0	0	0	0	0	0	0	0	0	0	0	0	0	0
	CAG-motif	part of a light response element	0	0	0	0	0	0	0	0	0	0	0	0	0	0	0	0	0	0	0	0	0	0	0	0	0	0	0	0	0	0	0	0	1	0	0	0	0	0	0	0	0	0	0	0	0	0	0
	chs-CMA1a	part of a light responsive element	0	0	2	0	0	0	0	1	1	0	1	2	0	0	0	0	0	0	0	1	0	0	0	0	1	0	0	1	0	0	0	1	0	0	1	0	0	0	0	0	0	0	0	0	0	0	1
	Gap-box	part of a light responsive element	0	0	0	0	0	0	0	0	0	0	0	0	0	0	0	1	0	0	0	1	0	0	1	0	0	0	0	0	0	0	0	0	0	0	0	0	0	0	0	0	0	0	0	0	0	0	0
	ACA-motif	part of gapA in (gapA-CMA1) involved with light responsiveness	0	0	0	0	0	0	0	0	0	0	0	0	0	0	0	0	0	0	0	0	0	0	0	0	0	0	0	0	0	0	0	0	0	0	0	0	0	0	0	0	0	0	0	0	0	0	0
	MRE	MYB binding site involved in light responsiveness	2	1	0	0	0	1	0	0	0	1	1	0	1	2	1	0	0	0	0	0	0	0	1	0	0	0	0	0	0	0	0	1	1	0	0	1	0	0	0	0	0	2	1	1	0	1	0
Abiotic and biotic stresses	GARE-motif	gibberellin-responsive element	0	0	0	0	0	0	0	0	0	0	0	0	0	0	0	0	0	0	0	0	0	0	0	0	0	0	0	0	0	0	0	0	0	0	0	0	0	0	0	0	0	0	0	0	0	0	0
	TATC-box	cis-acting element involved in gibberellin-responsiveness	0	0	1	0	1	0	1	0	0	0	0	1	0	0	1	0	0	1	0	0	0	0	0	0	0	0	0	0	0	0	0	0	0	0	0	0	0	1	0	0	1	0	0	0	1	0	1
	P-box	gibberellin-responsive element	0	0	0	0	0	0	2	0	1	0	0	0	0	0	0	0	0	0	0	0	1	0	0	0	1	0	0	0	2	1	0	0	2	0	0	1	0	1	2	0	0	2	1	0	0	1	0
	AuxRR-core	cis-acting regulatory element involved in auxin responsiveness	0	1	0	0	0	0	0	0	1	0	0	0	0	0	0	0	0	0	0	1	0	1	0	0	0	0	0	1	0	0	0	0	0	0	0	0	0	0	0	0	0	0	0	0	0	0	0
	TGA-element	auxin-responsive element	0	1	0	1	0	2	0	0	2	0	0	0	0	0	1	0	1	1	0	0	0	0	1	0	1	0	0	0	0	0	0	2	1	0	0	1	2	0	0	0	0	0	0	0	2	0	0
	AuxRE	part of an auxin-responsive element	0	0	0	0	0	0	0	0	0	0	0	0	0	0	0	0	0	0	0	0	0	0	0	0	0	0	0	0	0	0	0	0	0	0	0	0	0	0	0	0	0	0	0	0	0	0	0
	CGTCA-motif	cis-acting regulatory element involved in the MeJA-responsiveness	0	1	1	1	1	0	1	1	0	1	1	3	0	0	0	0	2	0	0	5	0	0	2	0	1	1	0	0	1	0	0	1	1	1	0	1	1	0	0	2	1	0	1	1	0	1	1
	TGACG-motif	cis-acting regulatory element involved in the MeJA-responsiveness	0	1	1	1	1	0	1	1	0	1	1	3	0	0	0	0	2	0	0	5	0	0	2	0	1	1	0	0	1	0	0	1	1	1	0	1	1	0	0	2	1	0	1	1	0	1	1
	TCA-element	cis-acting element involved in salicylic acid responsiveness	2	1	1	2	0	0	0	2	3	1	1	1	2	1	0	1	0	0	0	1	0	1	2	1	1	1	1	0	0	0	0	0	0	0	4	0	0	0	1	1	0	0	0	3	0	0	0
	SARE	cis-acting element involved in salicylic acid responsiveness	0	0	0	0	0	0	0	0	0	0	0	0	0	0	0	0	0	0	0	0	0	0	0	0	0	0	0	0	0	0	0	0	0	0	0	0	0	1	0	0	0	0	0	0	0	0	0
	DRE	cis-acting element involved in dehydration, low-temp, salt stresses	0	0	0	0	0	0	0	0	0	0	0	0	0	0	0	0	0	0	0	0	0	0	0	0	0	0	0	0	0	0	0	0	0	0	0	0	0	0	0	0	0	0	1	0	0	0	0
	TGA-box	part of an auxin-responsive element	0	0	0	0	0	0	0	0	0	0	0	0	0	0	0	0	0	0	0	0	0	0	0	0	0	0	0	0	0	0	0	0	0	0	0	0	0	0	0	0	0	0	0	0	0	0	0
	ABRE	cis-acting element involved in the abscisic acid responsiveness	2	1	2	1	1	2	1	3	0	2	5	3	0	2	1	0	7	0	0	1	3	2	1	1	6	4	2	1	0	0	0	3	5	0	3	3	3	0	2	2	3	0	3	3	4	1	3
	MBS	MYB binding site involved in drought-inducibility	1	0	0	0	0	0	1	3	0	0	2	1	0	0	1	1	1	0	0	0	0	2	1	1	2	0	1	1	1	0	0	0	2	1	0	0	1	0	0	1	1	1	2	3	2	2	0
	WUN-motif	wound-responsive element	0	0	0	0	1	0	0	0	0	0	0	0	1	0	0	0	0	0	0	0	0	1	0	0	0	0	0	0	0	0	0	0	0	0	0	1	0	0	0	0	0	0	0	0	0	0	0
	TC-rich repeats	cis-acting element involved in defense and stress responsiveness	0	0	0	0	1	2	0	1	0	0	2	0	0	0	0	0	0	0	1	0	1	0	0	2	2	0	0	0	0	0	0	1	2	0	0	0	2	0	1	0	0	1	0	1	1	0	0
	LTR	cis-acting element involved in low-temperature responsiveness	0	1	2	1	1	0	0	0	0	0	0	1	0	0	0	1	0	0	1	0	0	1	0	0	0	1	1	0	1	0	0	0	0	2	1	2	1	0	0	0	1	0	0	0	1	0	0
Plant growth and development	HD-Zip 1	element involved in differentiation of the palisade mesophyll cells	0	0	1	0	0	0	1	0	0	0	0	0	0	0	0	0	0	0	0	0	0	0	0	0	0	0	0	0	0	0	0	0	0	0	0	0	0	0	0	0	0	0	1	0	0	0	0
	GCN4_motif	cis-regulatory element involved in endosperm expression	0	0	0	0	1	1	0	0	0	0	1	0	0	0	0	0	0	0	1	0	0	0	0	0	0	2	0	2	0	0	0	0	0	0	0	0	0	0	0	0	0	0	0	0	0	0	2
	circadian	cis-acting regulatory element involved in circadian control	0	0	0	0	0	0	0	0	0	0	0	0	0	0	0	1	0	0	0	0	0	1	0	0	0	1	0	0	0	0	0	0	0	0	0	0	0	0	0	0	0	0	0	0	1	0	0
	RY-element	cis-acting regulatory element involved in seed-specific regulation	0	1	0	0	0	0	0	1	0	1	0	0	0	0	1	0	0	0	0	1	0	0	0	2	0	0	0	0	0	0	0	0	0	0	0	0	0	0	0	0	0	0	0	0	0	0	0
	AACA-motif	involved in endosperm-specific negative expression	0	0	0	0	0	0	0	0	0	0	0	0	0	0	0	0	1	0	0	0	0	0	0	0	0	0	0	0	0	0	0	0	0	0	0	0	0	0	0	0	0	0	0	0	0	0	0
	MBSI	MYB binding site involved in flavonoid biosynthetic genes regulation	0	0	0	0	0	0	0	0	0	0	0	0	0	0	1	0	0	1	0	0	0	0	0	0	0	0	0	0	1	0	0	0	0	0	0	0	0	0	0	0	1	0	0	0	0	0	2
	MSA-like	cis-acting element involved in cell cycle regulation	0	0	0	0	0	0	0	0	0	0	0	0	0	0	0	0	0	0	0	0	0	0	0	0	0	0	0	0	0	0	0	0	0	0	0	0	0	0	0	0	0	0	0	0	0	0	1
	O2-site	cis-acting regulatory element involved in zein metabolism regulation	0	1	1	0	0	0	0	1	0	0	0	0	0	0	1	0	1	1	0	1	0	0	0	0	0	0	0	0	0	0	0	0	0	0	0	0	0	0	0	0	0	0	1	0	1	0	0
	ARE	cis-acting regulatory element essential for the anaerobic induction	1	1	5	3	2	4	3	5	0	1	1	1	1	4	0	1	3	1	1	0	1	3	1	1	2	2	3	1	2	0	0	3	1	4	5	2	4	1	2	0	1	1	4	2	2	1	1
	GC-motif	enhancer-like element involved in anoxic specific inducibility	0	0	1	0	0	0	0	0	1	0	0	0	0	0	0	0	0	0	0	0	0	0	0	1	0	0	0	0	0	1	0	1	0	0	1	0	0	0	0	0	1	1	1	0	0	0	0
	CAT-box	cis-acting regulatory element related to meristem expression	0	0	0	0	0	0	2	0	0	0	0	0	0	0	0	0	0	0	0	1	1	1	2	0	1	0	0	2	1	0	0	0	0	0	0	0	0	0	0	0	0	0	0	0	0	0	0
[truncated: 26 more columns]

## Sheet: Sheet2
			Gene name
Classification	Elements	Function	AT1G10120	AT1G10610	AT1G25330	AT1G32640	AT1G49770	AT1G51070	AT1G51140	AT1G59640	AT1G68810	AT1G68920	AT1G69010	AT1G72210	AT1G73830	AT2G16910	AT2G18300	AT2G20180	AT2G24260	AT2G28160	AT2G34820	AT2G40200	AT2G41130	AT2G42280	AT2G46970	AT3G19860	AT3G21330	AT3G22100	AT3G24140	AT3G26744	AT3G50330	AT3G57800	AT3G61950	AT4G00050	AT4G02590	AT4G09820	AT4G14410	AT4G33880	AT4G34530	AT4G36930	AT4G37850	AT5G08130	AT5G37800	AT5G41315	AT5G48560	AT5G50915	AT5G53210	AT5G54680	AT5G57150
light	AE-box	part of a module for light response	3	0	0	1	1	1	1	1	2	0	0	2	1	0	2	1	3	1	1	0	0	0	0	1	0	0	1	1	1	0	1	0	1	1	1	0	1	0	0	1	0	0	0	0	1	1	0
	G-Box	cis-acting regulatory element involved in light responsiveness	0	0	1	3	3	1	1	5	1	0	0	4	1	0	1	1	0	0	0	3	3	1	0	5	0	2	3	3	1	1	0	0	0	0	1	0	0	2	2	3	0	0	0	0	3	0	0
	G-box	cis-acting regulatory element involved in light responsiveness	1	0	0	3	3	0	1	8	5	0	2	8	5	0	0	0	0	1	1	2	3	1	1	3	2	2	3	3	1	4	1	1	1	1	3	2	0	1	1	6	1	1	0	0	2	1	3
	GA-motif	part of a light responsive element	0	0	0	0	0	0	0	0	0	1	0	1	0	1	0	1	0	0	0	0	0	0	1	0	0	1	0	0	0	0	1	0	1	1	0	0	0	0	0	0	1	1	0	0	0	0	0
	GT1-motif	light responsive element	2	0	0	1	1	1	2	2	3	1	1	1	3	2	2	1	5	0	0	1	0	2	1	1	1	3	0	0	0	2	2	1	2	2	2	1	1	2	2	2	2	2	3	3	0	1	1
	I-box	part of a light responsive element	0	0	0	0	0	0	0	2	0	0	0	0	0	0	0	2	0	0	0	0	0	1	0	1	0	0	0	0	0	0	0	1	0	0	0	0	1	1	1	0	2	2	0	0	1	0	1
	TCT-motif	part of a light responsive element	2	1	5	5	5	3	0	1	1	1	5	0	1	2	0	2	0	0	0	1	1	0	2	0	2	1	2	2	1	2	0	1	0	0	1	0	1	0	0	1	4	4	0	0	1	0	2
	ACE	cis-acting element involved in light responsiveness	0	0	0	0	0	1	0	2	0	0	0	0	0	0	0	0	0	0	0	1	1	2	0	0	0	0	0	0	0	1	0	0	0	0	0	0	0	1	1	1	0	0	0	0	2	1	0
	GATA-motif	part of a light responsive element	0	1	0	1	1	2	0	1	2	0	0	0	2	1	0	0	0	1	1	2	1	1	1	0	0	0	2	2	0	1	0	0	0	0	0	2	0	1	1	1	0	0	0	0	2	1	1
	Sp1	light responsive element	0	0	0	0	0	0	0	0	1	0	0	0	0	0	0	0	0	0	0	0	0	0	0	0	0	0	0	0	0	0	0	0	0	0	0	1	0	0	0	0	0	0	2	2	0	0	0
	TCCC-motif	part of a light responsive element	0	0	0	0	0	0	1	0	0	0	0	0	0	0	0	0	0	0	0	0	0	0	0	1	1	1	0	0	0	0	0	1	0	0	0	0	0	1	1	0	0	0	0	0	0	0	0
	AT1-motif	part of a light responsive module	0	0	0	0	0	0	0	0	1	0	0	0	0	0	0	0	0	0	0	0	0	0	0	0	0	0	0	0	0	0	0	3	0	0	0	1	0	0	0	0	0	0	0	0	0	0	0
	chs-CMA2a	part of a light responsive element	0	0	0	0	0	0	0	0	0	0	0	0	0	0	0	0	0	0	0	0	0	0	0	0	0	0	0	0	0	0	0	0	0	0	0	0	0	0	0	1	0	0	0	0	0	0	0
	Box II	part of a light responsive element	0	0	0	0	0	0	0	1	0	0	0	0	0	0	0	0	0	0	0	0	0	0	0	0	0	0	0	0	1	0	0	0	0	0	1	0	0	0	0	0	0	0	0	0	0	0	0
	Box 4	part of a conserved DNA module involved in light responsiveness	1	2	4	5	5	3	1	6	7	3	1	1	3	4	0	3	1	4	4	5	1	0	3	0	0	6	2	2	1	2	3	3	8	8	1	0	2	3	3	1	6	6	2	2	3	4	3
	ATCT-motif	part of a conserved DNA module involved in light responsiveness	0	0	0	0	0	0	0	0	0	0	0	0	0	2	0	0	0	0	0	0	0	0	0	0	0	0	0	0	0	0	1	3	0	0	1	0	0	0	0	0	0	0	0	0	0	0	2
	GTGGC-motif	part of a light responsive element	0	0	0	0	0	0	0	0	0	0	0	0	0	0	0	1	0	0	0	0	0	0	0	0	0	0	0	0	0	0	0	0	0	0	0	0	0	0	0	0	0	0	0	0	0	0	0
	ATC-motif	part of a conserved DNA module involved in light responsiveness	0	0	0	0	0	0	0	0	0	0	0	0	0	0	0	0	0	0	0	0	0	0	0	0	0	0	0	0	0	0	0	0	1	1	0	0	0	0	0	0	0	0	0	0	0	0	0
	3-AF1 binding site	light responsive element	0	0	0	1	1	0	0	0	0	0	0	0	0	0	0	0	0	0	0	0	0	0	0	0	0	0	0	0	0	0	1	0	0	0	0	0	0	0	0	0	1	1	0	0	0	0	0
	LAMP-element	part of a light responsive element	0	0	1	0	0	0	0	0	1	0	0	0	0	0	0	0	1	0	0	0	0	0	0	0	0	0	0	0	0	0	1	0	0	0	0	0	0	0	0	0	0	0	0	0	1	0	1
	AACA_motif	involved in endosperm-specific negative expression	0	0	0	0	0	0	0	0	0	0	1	0	0	0	0	0	1	0	0	0	0	0	0	0	0	0	0	0	0	0	0	0	0	0	0	0	0	0	0	0	0	0	0	0	0	0	0
	P-box	gibberellin-responsive element	0	0	2	0	0	0	1	0	0	1	1	0	0	0	0	0	1	0	0	0	0	1	0	1	0	0	0	0	0	0	1	0	1	1	0	0	0	0	0	0	0	0	0	0	0	1	0
	chs-CMA1a	part of a light responsive element	0	0	2	0	0	1	0	0	1	0	0	0	0	2	0	0	0	0	0	2	0	0	0	0	1	0	0	0	2	0	0	0	0	0	0	0	0	0	0	1	0	0	1	1	2	0	1
	Gap-box	part of a light responsive element	0	0	0	0	0	0	0	0	0	1	0	0	0	0	0	0	0	0	0	0	0	0	0	0	0	0	0	0	0	0	0	0	0	0	1	0	0	0	0	0	0	0	0	0	0	0	0
	MRE	MYB binding site involved in light responsiveness	1	1	0	0	0	1	0	0	1	0	1	0	0	1	1	2	0	0	0	0	1	1	0	1	1	3	0	0	0	0	1	0	1	1	1	0	0	0	0	2	0	0	0	0	0	1	0
	sbp-CMA1c	part of a light responsive element	0	0	0	0	0	0	1	0	0	0	0	0	0	0	0	0	0	0	0	0	0	0	0	0	0	0	0	0	0	0	0	0	0	0	0	0	0	0	0	0	0	0	0	0	0	0	0
	LS7	part of a light responsive element	0	0	0	1	1	0	0	0	0	0	0	0	0	0	0	0	0	0	0	0	0	0	0	0	0	0	0	0	0	1	0	0	0	0	0	0	0	0	0	0	0	0	0	0	0	0	0
Abiotic and biotic stresses	GARE-motif	gibberellin-responsive element	0	0	0	0	0	0	0	2	0	0	0	0	0	0	0	0	0	0	0	0	0	0	0	0	1	0	0	0	1	0	0	0	0	0	0	1	0	0	0	0	0	0	0	0	0	0	0
	TATC-box	cis-acting element involved in gibberellin-responsiveness	0	0	0	2	2	0	0	0	0	0	0	0	2	0	0	0	0	1	1	1	0	0	0	0	0	0	0	0	0	0	0	0	0	0	0	0	1	0	0	0	0	0	1	1	0	1	0
	AuxRR-core	cis-acting regulatory element involved in auxin responsiveness	0	0	0	0	0	0	0	0	0	0	0	0	0	0	0	1	0	0	0	0	0	0	1	0	0	0	0	0	0	0	0	0	0	0	0	0	1	0	0	0	0	0	0	0	0	0	0
	TGA-element	auxin-responsive element	0	1	0	2	2	0	0	1	2	0	0	0	0	1	1	0	0	0	0	0	1	1	2	1	0	1	1	1	0	0	0	1	1	1	1	2	2	0	0	1	2	2	1	1	1	1	1
	CGTCA-motif	cis-acting regulatory element involved in the MeJA-responsiveness	0	1	1	3	3	0	1	3	0	0	2	2	1	0	3	0	1	0	0	1	3	4	4	1	0	3	0	0	1	5	0	0	4	4	1	4	1	1	1	1	0	0	2	2	0	0	2
	TGACG-motif	cis-acting regulatory element involved in the MeJA-responsiveness	0	1	1	3	3	0	1	3	0	0	2	2	1	0	3	0	1	0	0	1	3	4	4	1	0	3	0	0	1	5	0	0	4	4	1	4	1	1	1	1	0	0	2	2	0	0	2
	TCA-element	cis-acting element involved in salicylic acid responsiveness	0	0	2	0	0	1	0	0	0	0	1	0	0	2	0	0	0	0	0	2	0	2	1	1	1	1	1	1	1	1	2	0	0	0	0	0	1	0	0	0	1	1	0	0	1	2	1
	SARE	cis-acting element involved in salicylic acid responsiveness	0	0	0	0	0	0	0	0	0	0	0	0	0	1	0	0	0	0	0	0	0	0	0	0	0	0	0	0	0	0	0	0	0	0	0	0	0	0	0	0	0	0	0	0	0	0	0
	TGA-box	part of an auxin-responsive element	0	0	0	0	0	0	0	0	0	0	0	0	0	0	0	0	0	0	0	0	0	0	0	0	0	0	0	0	0	0	0	0	0	0	0	1	0	0	0	0	0	0	0	0	0	0	0
	ABRE	cis-acting element involved in the abscisic acid responsiveness	1	0	1	6	6	1	2	11	6	0	2	12	3	0	1	1	0	1	1	5	4	2	1	9	1	2	6	6	1	5	2	1	0	0	4	2	0	3	3	9	1	1	0	0	7	3	2
	MBS	MYB binding site involved in drought-inducibility	1	1	1	0	0	1	0	0	0	0	0	1	4	2	1	1	0	2	2	0	1	0	1	3	1	0	0	0	0	1	0	0	0	0	2	1	0	1	1	1	1	1	0	0	0	1	1
	WUN-motif	wound-responsive element	1	0	1	0	0	0	1	0	0	0	0	0	0	0	0	0	0	0	0	0	0	0	0	0	0	0	0	0	0	0	0	0	0	0	0	0	0	0	0	0	0	0	0	0	2	0	0
	TC-rich repeats	cis-acting element involved in defense and stress responsiveness	1	1	3	0	0	1	1	2	1	0	1	0	1	1	0	1	1	0	0	0	0	0	0	0	1	0	0	0	1	2	2	5	0	0	0	0	1	2	2	0	1	1	0	0	4	0	2
	LTR	cis-acting element involved in low-temperature responsiveness	1	0	0	0	0	0	1	0	0	0	0	1	3	0	1	0	0	1	1	0	0	0	0	2	0	1	1	1	0	0	1	1	0	0	1	0	1	0	0	0	1	1	0	0	1	0	0
Plant growth and development	HD-Zip 1	element involved in differentiation of the palisade mesophyll cells	0	0	0	0	0	0	0	1	0	0	1	0	0	0	0	0	0	0	0	1	1	0	0	0	0	0	0	0	0	0	0	0	0	0	0	0	0	0	0	0	0	0	0	0	0	0	0
	GCN4_motif	cis-regulatory element involved in endosperm expression	0	0	0	0	0	0	0	0	0	0	0	0	1	0	1	0	0	0	0	0	0	1	1	1	0	0	1	1	0	1	0	0	0	0	0	0	0	0	0	0	0	0	0	0	0	0	0
	circadian	cis-acting regulatory element involved in circadian control	1	2	0	0	0	0	1	0	0	0	0	0	0	0	1	1	0	1	1	0	2	0	1	0	0	0	1	1	0	0	0	1	0	0	0	0	1	1	1	0	1	1	0	0	0	0	0
	RY-element	cis-acting regulatory element involved in seed-specific regulation	1	0	0	0	0	0	0	0	0	0	0	0	1	0	1	0	0	1	1	0	0	0	0	0	0	0	0	0	0	0	0	0	0	0	0	0	0	0	0	0	0	0	0	0	0	1	0
	MBSI	MYB binding site involved in flavonoid biosynthetic genes regulation	0	0	0	0	0	2	0	0	0	0	0	0	1	1	0	0	0	1	1	0	0	0	0	0	1	0	0	0	0	0	0	1	0	0	1	0	0	0	0	0	0	0	2	2	0	0	0
	MSA-like	cis-acting element involved in cell cycle regulation	0	0	0	0	0	0	1	0	0	0	0	0	0	0	0	0	0	0	0	0	0	0	0	0	0	0	0	0	0	0	0	0	0	0	0	0	0	0	0	0	0	0	0	0	0	0	0
	O2-site	cis-acting regulatory element involved in zein metabolism regulation	0	1	1	0	0	0	0	1	0	2	0	0	0	0	0	0	1	0	0	0	0	0	1	1	0	0	0	0	1	0	0	0	0	0	1	1	0	0	0	1	1	1	0	0	2	1	0
	ARE	cis-acting regulatory element essential for the anaerobic induction	1	0	1	3	3	1	2	0	2	3	6	5	5	3	1	2	3	3	3	2	1	2	1	7	0	1	3	3	2	2	1	0	0	0	3	4	0	2	2	2	3	3	4	4	2	2	6
	GC-motif	enhancer-like element involved in anoxic specific inducibility	0	0	0	0	0	0	0	0	0	0	0	0	0	0	0	0	0	0	0	0	0	0	0	0	0	0	0	0	0	0	0	0	0	0	0	0	0	0	0	0	1	1	0	0	0	0	0
	CAT-box	cis-acting regulatory element related to meristem expression	0	0	0	1	1	0	0	0	0	0	0	3	0	1	0	0	0	0	0	0	0	1	0	0	0	0	1	1	0	0	0	0	1	1	2	3	0	0	0	1	0	0	0	0	0	0	1
	3-AF3 binding site	part of a conserved DNA module array (CMA3)	0	0	0	0	0	0	1	0	0	0	0	0	0	0	0	0	0	1	1	0	0	0	0	0	0	0	0	0	0	0	0	0	0	0	0	0	0	0	0	0	0	0	0	0	0	0	0
	A-box	cis-acting regulatory element	0	1	0	0	0	0	0	0	0	0	0	0	0	0	0	0	0	0	0	0	0	0	0	0	0	0	0	0	0	0	0	4	0	0	0	0	0	0	0	0	0	0	0	0	0	0	0
	A-box	sequence conserved in alpha-amylase promoters	0	0	0	0	0	0	0	0	0	0	0	0	0	0	0	0	1	0	0	0	0	0	0	0	0	0	0	0	0	0	0	0	0	0	0	0	0	0	0	0	0	0	0	0	0	0	0
	AT-rich element	binding site of AT-rich DNA binding protein (ATBP-1)	1	0	1	0	0	0	0	0	0	1	0	1	0	0	0	0	0	0	0	0	1	0	0	0	0	0	1	1	0	1	0	0	0	0	0	0	0	0	0	1	0	0	0	0	0	0	1
	AT-rich sequence	element for maximal elicitor-mediated activation (2copies)	0	0	0	1	1	0	0	0	0	0	0	0	0	1	0	0	0	0	0	0	0	0	0	0	0	0	1	1	0	0	0	0	0	0	0	0	0	1	1	0	1	1	0	0	1	0	0
	Box III	protein binding site	0	0	0	0	0	0	0	0	0	0	0	0	0	0	0	0	0	0	0	0	1	0	0	0	0	0	0	0	0	0	0	0	0	0	0	0	0	0	0	0	0	0	0	0	0	0	0
	CCAAT-box	MYBHv1 binding site	2	0	0	0	0	0	1	0	0	0	0	0	0	0	0	0	0	0	0	0	0	0	0	0	0	0	0	0	0	0	1	0	0	0	1	0	1	0	0	0	0	0	0	0	1	1	0
[truncated: 2 more columns]
