# Supplementary material for: Genome-wide analysis of basic helix-loop-helix transcription factors in papaya (Carica papaya L.)
Source: PeerJ. 2020 Jul 3;8:e9319. doi: 10.7717/peerj.9319 (PMC7341539; doi:10.7717/peerj.9319)
Supplement: Supplemental Information 5 [file peerj-08-9319-s005.xlsx]

## Sheet: Sheet1
name	Gene	GO term				supercontig_5	phytozomev11	gene	1550401	1550757	.	-	.	ID=evm.TU.supercontig_5.180;Name=evm.TU.supercontig_5.180
CpbHLH072	evm.TU.supercontig_1213.3	GO:0046983				supercontig_5	phytozomev11	mRNA	1550401	1550757	.	-	.	ID=PAC:16421285;Name=evm.model.supercontig_5.180;pacid=16421285;longest=1;Parent=evm.TU.supercontig_5.180
CpbHLH013	evm.TU.supercontig_203.5	GO:0046983				supercontig_5	phytozomev11	CDS	1550401	1550757	.	-	0	ID=PAC:16421285.CDS.1;Parent=PAC:16421285;pacid=16421285
CpbHLH027	evm.TU.supercontig_1024.1	GO:0046983				supercontig_1938	phytozomev11	gene	8503	9282	.	+	.	ID=evm.TU.supercontig_1938.2;Name=evm.TU.supercontig_1938.2
CpbHLH001	evm.TU.supercontig_82.59	GO:0046983				supercontig_1938	phytozomev11	mRNA	8503	9282	.	+	.	ID=PAC:16412236;Name=evm.model.supercontig_1938.2;pacid=16412236;longest=1;Parent=evm.TU.supercontig_1938.2
CpbHLH070	evm.TU.supercontig_71.72	GO:0046983				supercontig_1938	phytozomev11	CDS	8503	8562	.	+	1	ID=PAC:16412236.CDS.1;Parent=PAC:16412236;pacid=16412236
CpbHLH067	evm.TU.supercontig_141.19	GO:0046983				supercontig_1938	phytozomev11	CDS	8661	8999	.	+	1	ID=PAC:16412236.CDS.2;Parent=PAC:16412236;pacid=16412236
CpbHLH060	evm.TU.supercontig_21.176	GO:0046983				supercontig_1938	phytozomev11	CDS	9148	9282	.	+	0	ID=PAC:16412236.CDS.3;Parent=PAC:16412236;pacid=16412236
CpbHLH064	evm.TU.supercontig_49.31	GO:0046983				supercontig_4	phytozomev11	mRNA	3212856	3213810	.	+	.	ID=PAC:16419265;Name=evm.model.supercontig_4.181;pacid=16419265;longest=1;Parent=evm.TU.supercontig_4.181
CpbHLH008	evm.TU.supercontig_55.142	GO:0046983				supercontig_4	phytozomev11	CDS	3212856	3213071	.	+	1	ID=PAC:16419265.CDS.1;Parent=PAC:16419265;pacid=16419265
CpbHLH005	evm.TU.supercontig_81.11	GO:0046983				supercontig_4	phytozomev11	CDS	3213279	3213626	.	+	1	ID=PAC:16419265.CDS.2;Parent=PAC:16419265;pacid=16419265
CpbHLH006	evm.TU.supercontig_17.155	GO:0046983				supercontig_4	phytozomev11	gene	3196092	3197061	.	+	.	ID=evm.TU.supercontig_4.179;Name=evm.TU.supercontig_4.179
CpbHLH071	evm.TU.supercontig_1892.1	GO:0046983				supercontig_4	phytozomev11	mRNA	3196092	3197061	.	+	.	ID=PAC:16419262;Name=evm.model.supercontig_4.179;pacid=16419262;longest=1;Parent=evm.TU.supercontig_4.179
CpbHLH032	evm.TU.supercontig_129.37	GO:0046983				supercontig_4	phytozomev11	CDS	3196092	3196448	.	+	0	ID=PAC:16419262.CDS.1;Parent=PAC:16419262;pacid=16419262
CpbHLH044	evm.TU.supercontig_160.32	GO:0046983				supercontig_4	phytozomev11	CDS	3197044	3197061	.	+	0	ID=PAC:16419262.CDS.3;Parent=PAC:16419262;pacid=16419262
CpbHLH004	evm.TU.supercontig_129.19	GO:0046983				supercontig_69	phytozomev11	gene	448614	449876	.	-	.	ID=evm.TU.supercontig_69.33;Name=evm.TU.supercontig_69.33
CpbHLH025	evm.TU.supercontig_289.6	GO:0046983				supercontig_69	phytozomev11	mRNA	448614	449876	.	-	.	ID=PAC:16424902;Name=evm.model.supercontig_69.33;pacid=16424902;longest=1;Parent=evm.TU.supercontig_69.33
CpbHLH068	evm.TU.supercontig_52.26	GO:0046983				supercontig_69	phytozomev11	CDS	449760	449876	.	-	1	ID=PAC:16424902.CDS.1;Parent=PAC:16424902;pacid=16424902
CpbHLH073	evm.TU.supercontig_69.52	GO:0046983				supercontig_69	phytozomev11	CDS	449311	449637	.	-	0	ID=PAC:16424902.CDS.2;Parent=PAC:16424902;pacid=16424902
CpbHLH029	evm.TU.supercontig_1.175	GO:0046983				supercontig_69	phytozomev11	CDS	448614	448682	.	-	1	ID=PAC:16424902.CDS.3;Parent=PAC:16424902;pacid=16424902
CpbHLH045	evm.TU.supercontig_3.225	GO:0046983				supercontig_69	phytozomev11	gene	413520	414784	.	-	.	ID=evm.TU.supercontig_69.31;Name=evm.TU.supercontig_69.31
CpbHLH062	evm.TU.supercontig_70.77	GO:0046983				supercontig_69	phytozomev11	mRNA	413520	414784	.	-	.	ID=PAC:16424900;Name=evm.model.supercontig_69.31;pacid=16424900;longest=1;Parent=evm.TU.supercontig_69.31
CpbHLH063	evm.TU.supercontig_212.3	GO:0046983				supercontig_69	phytozomev11	CDS	414668	414784	.	-	1	ID=PAC:16424900.CDS.1;Parent=PAC:16424900;pacid=16424900
CpbHLH043	evm.TU.supercontig_8.103	GO:0046983				supercontig_69	phytozomev11	CDS	414217	414543	.	-	0	ID=PAC:16424900.CDS.2;Parent=PAC:16424900;pacid=16424900
CpbHLH049	evm.TU.supercontig_8.253	GO:0046983				supercontig_69	phytozomev11	CDS	413520	413588	.	-	1	ID=PAC:16424900.CDS.3;Parent=PAC:16424900;pacid=16424900
CpbHLH041	evm.TU.supercontig_84.89	GO:0046983				supercontig_124	phytozomev11	gene	738856	739925	.	-	.	ID=evm.TU.supercontig_124.41;Name=evm.TU.supercontig_124.41
CpbHLH020	evm.TU.supercontig_8.199	GO:0046983				supercontig_124	phytozomev11	CDS	739791	739925	.	-	1	ID=PAC:16407199.CDS.1;Parent=PAC:16407199;pacid=16407199
CpbHLH012	evm.TU.supercontig_157.5	GO:0046983				supercontig_124	phytozomev11	CDS	738856	738942	.	-	1	ID=PAC:16407199.CDS.3;Parent=PAC:16407199;pacid=16407199
CpbHLH054	evm.TU.supercontig_120.27	GO:0046983				supercontig_27	phytozomev11	gene	332539	333379	.	+	.	ID=evm.TU.supercontig_27.35;Name=evm.TU.supercontig_27.35
CpbHLH047	evm.TU.supercontig_200.36	GO:0046983				supercontig_27	phytozomev11	mRNA	332539	333379	.	+	.	ID=PAC:16415654;Name=evm.model.supercontig_27.35;pacid=16415654;longest=1;Parent=evm.TU.supercontig_27.35
CpbHLH009	evm.TU.supercontig_85.120	GO:0046983				supercontig_27	phytozomev11	CDS	332539	332661	.	+	1	ID=PAC:16415654.CDS.1;Parent=PAC:16415654;pacid=16415654
CpbHLH024	evm.TU.supercontig_7.53	GO:0046983				supercontig_27	phytozomev11	CDS	332756	333088	.	+	0	ID=PAC:16415654.CDS.2;Parent=PAC:16415654;pacid=16415654
CpbHLH042	evm.TU.supercontig_6.130	GO:0046983				supercontig_27	phytozomev11	CDS	333281	333379	.	+	1	ID=PAC:16415654.CDS.3;Parent=PAC:16415654;pacid=16415654
CpbHLH038	evm.TU.supercontig_65.44	GO:0046983				contig_36549	phytozomev11	gene	1040	1377	.	+	.	ID=evm.TU.contig_36549;Name=evm.TU.contig_36549
CpbHLH037	evm.TU.supercontig_65.63	GO:0046983				contig_36549	phytozomev11	mRNA	1040	1377	.	+	.	ID=PAC:16430864;Name=evm.TU.contig_36549.1;pacid=16430864;longest=1;Parent=evm.TU.contig_36549
CpbHLH015	evm.TU.supercontig_489.6	GO:0046983				contig_36549	phytozomev11	CDS	1040	1123	.	+	0	ID=PAC:16430864.CDS.1;Parent=PAC:16430864;pacid=16430864
CpbHLH021	evm.TU.supercontig_55.64	GO:0046983				contig_36549	phytozomev11	CDS	1225	1377	.	+	0	ID=PAC:16430864.CDS.2;Parent=PAC:16430864;pacid=16430864
CpbHLH016	evm.TU.supercontig_57.85	GO:0046983				supercontig_14	phytozomev11	gene	203642	204562	.	+	.	ID=evm.TU.supercontig_14.15;Name=evm.TU.supercontig_14.15
CpbHLH033	evm.TU.supercontig_52.97	GO:0046983				supercontig_14	phytozomev11	mRNA	203642	204562	.	+	.	ID=PAC:16408647;Name=evm.model.supercontig_14.15;pacid=16408647;longest=1;Parent=evm.TU.supercontig_14.15
CpbHLH050	evm.TU.supercontig_106.57	GO:0046983				supercontig_14	phytozomev11	CDS	203642	203767	.	+	0	ID=PAC:16408647.CDS.1;Parent=PAC:16408647;pacid=16408647
CpbHLH035	evm.TU.supercontig_53.118	GO:0046983				supercontig_14	phytozomev11	CDS	204410	204562	.	+	0	ID=PAC:16408647.CDS.2;Parent=PAC:16408647;pacid=16408647
CpbHLH058	evm.TU.supercontig_97.78	GO:0046983				supercontig_388	phytozomev11	mRNA	30682	31434	.	+	.	ID=PAC:16418982;Name=evm.model.supercontig_388.7;pacid=16418982;longest=1;Parent=evm.TU.supercontig_388.7
CpbHLH007	evm.TU.supercontig_131.7	GO:0046983				supercontig_388	phytozomev11	CDS	30682	30807	.	+	0	ID=PAC:16418982.CDS.1;Parent=PAC:16418982;pacid=16418982
CpbHLH065	evm.TU.supercontig_537.2	GO:0046983				supercontig_388	phytozomev11	CDS	31285	31434	.	+	0	ID=PAC:16418982.CDS.2;Parent=PAC:16418982;pacid=16418982
CpbHLH002	evm.TU.supercontig_59.132	GO:0046983				supercontig_183	phytozomev11	mRNA	304088	304750	.	-	.	ID=PAC:16411615;Name=evm.model.supercontig_183.32;pacid=16411615;longest=1;Parent=evm.TU.supercontig_183.32
CpbHLH023	evm.TU.supercontig_19.156	GO:0046983				supercontig_183	phytozomev11	CDS	304625	304750	.	-	0	ID=PAC:16411615.CDS.1;Parent=PAC:16411615;pacid=16411615
CpbHLH018	evm.TU.supercontig_489.5	GO:0046983				supercontig_183	phytozomev11	CDS	304088	304240	.	-	0	ID=PAC:16411615.CDS.2;Parent=PAC:16411615;pacid=16411615
CpbHLH014	evm.TU.supercontig_57.28	GO:0046983				supercontig_3	phytozomev11	mRNA	299950	302098	.	+	.	ID=PAC:16416824;Name=evm.model.supercontig_3.51;pacid=16416824;longest=1;Parent=evm.TU.supercontig_3.51
CpbHLH056	evm.TU.supercontig_3.503	GO:0046983				supercontig_3	phytozomev11	CDS	299950	300399	.	+	1	ID=PAC:16416824.CDS.1;Parent=PAC:16416824;pacid=16416824
CpbHLH051	evm.TU.supercontig_5.303	GO:0046983				supercontig_3	phytozomev11	CDS	300656	301204	.	+	1	ID=PAC:16416824.CDS.2;Parent=PAC:16416824;pacid=16416824
CpbHLH034	evm.TU.supercontig_282.7	GO:0046983				supercontig_3	phytozomev11	CDS	302033	302098	.	+	0	ID=PAC:16416824.CDS.3;Parent=PAC:16416824;pacid=16416824
CpbHLH003	evm.TU.supercontig_117.94	GO:0046983				supercontig_57	phytozomev11	gene	1349159	1350985	.	-	.	ID=evm.TU.supercontig_57.85;Name=evm.TU.supercontig_57.85
CpbHLH011	evm.TU.supercontig_48.15	GO:0046983				supercontig_57	phytozomev11	mRNA	1349159	1350985	.	-	.	ID=PAC:16422911;Name=evm.model.supercontig_57.85;pacid=16422911;longest=1;Parent=evm.TU.supercontig_57.85
CpbHLH066	evm.TU.supercontig_20.95	GO:0046983				supercontig_57	phytozomev11	CDS	1350953	1350985	.	-	1	ID=PAC:16422911.CDS.1;Parent=PAC:16422911;pacid=16422911
CpbHLH040	evm.TU.supercontig_85.115	GO:0046983				supercontig_57	phytozomev11	CDS	1349159	1349245	.	-	1	ID=PAC:16422911.CDS.4;Parent=PAC:16422911;pacid=16422911
CpbHLH017	evm.TU.supercontig_62.160	GO:0046983				supercontig_59	phytozomev11	gene	1233023	1234720	.	-	.	ID=evm.TU.supercontig_59.132;Name=evm.TU.supercontig_59.132
CpbHLH057	evm.TU.supercontig_20.63	GO:0046983				supercontig_59	phytozomev11	mRNA	1233023	1234720	.	-	.	ID=PAC:16423141;Name=evm.model.supercontig_59.132;pacid=16423141;longest=1;Parent=evm.TU.supercontig_59.132
CpbHLH031	evm.TU.contig_45808.1	GO:0046983				supercontig_59	phytozomev11	CDS	1233252	1233680	.	-	0	ID=PAC:16423141.CDS.2;Parent=PAC:16423141;pacid=16423141
CpbHLH061	evm.TU.supercontig_21.7	GO:0046983				supercontig_59	phytozomev11	CDS	1233023	1233112	.	-	1	ID=PAC:16423141.CDS.3;Parent=PAC:16423141;pacid=16423141
CpbHLH026	evm.TU.supercontig_115.71	GO:0046983				supercontig_55	phytozomev11	gene	364434	365868	.	+	.	ID=evm.TU.supercontig_55.64;Name=evm.TU.supercontig_55.64
CpbHLH069	evm.TU.supercontig_92.83	GO:0046983				supercontig_55	phytozomev11	mRNA	364434	365868	.	+	.	ID=PAC:16422632;Name=evm.model.supercontig_55.64;pacid=16422632;longest=1;Parent=evm.TU.supercontig_55.64
CpbHLH052	evm.TU.contig_27490	GO:0046983				supercontig_55	phytozomev11	CDS	365136	365570	.	+	1	ID=PAC:16422632.CDS.2;Parent=PAC:16422632;pacid=16422632
CpbHLH022	evm.TU.supercontig_6.255	GO:0046983				supercontig_36	phytozomev11	gene	1426657	1428000	.	-	.	ID=evm.TU.supercontig_36.191;Name=evm.TU.supercontig_36.191
CpbHLH048	evm.TU.supercontig_44.78	GO:0046983				supercontig_36	phytozomev11	mRNA	1426657	1428000	.	-	.	ID=PAC:16418383;Name=evm.model.supercontig_36.191;pacid=16418383;longest=1;Parent=evm.TU.supercontig_36.191
CpbHLH036	evm.TU.supercontig_36.191	GO:0046983				supercontig_36	phytozomev11	CDS	1427554	1428000	.	-	0	ID=PAC:16418383.CDS.1;Parent=PAC:16418383;pacid=16418383
CpbHLH055	evm.TU.supercontig_55.51	GO:0046983				supercontig_36	phytozomev11	CDS	1427028	1427420	.	-	1	ID=PAC:16418383.CDS.2;Parent=PAC:16418383;pacid=16418383
CpbHLH019	evm.TU.supercontig_177.1	GO:0046983				supercontig_48	phytozomev11	gene	82329	83493	.	-	.	ID=evm.TU.supercontig_48.15;Name=evm.TU.supercontig_48.15
CpbHLH046	evm.TU.supercontig_142.14	GO:0046983				supercontig_48	phytozomev11	mRNA	82329	83493	.	-	.	ID=PAC:16420784;Name=evm.model.supercontig_48.15;pacid=16420784;longest=1;Parent=evm.TU.supercontig_48.15
CpbHLH039	evm.TU.supercontig_4.112	GO:0046983				supercontig_48	phytozomev11	CDS	83020	83493	.	-	0	ID=PAC:16420784.CDS.1;Parent=PAC:16420784;pacid=16420784
CpbHLH059	evm.TU.supercontig_21.177	GO:0046983				supercontig_48	phytozomev11	CDS	82455	82900	.	-	0	ID=PAC:16420784.CDS.2;Parent=PAC:16420784;pacid=16420784
CpbHLH010	evm.TU.supercontig_3.51	GO:0046983				supercontig_48	phytozomev11	CDS	82329	82350	.	-	0	ID=PAC:16420784.CDS.3;Parent=PAC:16420784;pacid=16420784
						supercontig_58	phytozomev11	gene	503746	505084	.	+	.	ID=evm.TU.supercontig_58.45;Name=evm.TU.supercontig_58.45
						supercontig_58	phytozomev11	mRNA	503746	505084	.	+	.	ID=PAC:16423017;Name=evm.model.supercontig_58.45;pacid=16423017;longest=1;Parent=evm.TU.supercontig_58.45
						supercontig_58	phytozomev11	CDS	503746	504060	.	+	1	ID=PAC:16423017.CDS.1;Parent=PAC:16423017;pacid=16423017
						supercontig_58	phytozomev11	CDS	504320	504613	.	+	0	ID=PAC:16423017.CDS.2;Parent=PAC:16423017;pacid=16423017
						supercontig_58	phytozomev11	CDS	504926	505084	.	+	0	ID=PAC:16423017.CDS.3;Parent=PAC:16423017;pacid=16423017
						supercontig_61	phytozomev11	gene	385797	389036	.	-	.	ID=evm.TU.supercontig_61.16;Name=evm.TU.supercontig_61.16
						supercontig_61	phytozomev11	mRNA	385797	389036	.	-	.	ID=PAC:16423830;Name=evm.model.supercontig_61.16;pacid=16423830;longest=1;Parent=evm.TU.supercontig_61.16
						supercontig_61	phytozomev11	CDS	388924	389036	.	-	1	ID=PAC:16423830.CDS.1;Parent=PAC:16423830;pacid=16423830
						supercontig_61	phytozomev11	CDS	388566	388688	.	-	0	ID=PAC:16423830.CDS.2;Parent=PAC:16423830;pacid=16423830
						supercontig_61	phytozomev11	CDS	388314	388422	.	-	1	ID=PAC:16423830.CDS.3;Parent=PAC:16423830;pacid=16423830
						supercontig_61	phytozomev11	CDS	387198	387838	.	-	0	ID=PAC:16423830.CDS.4;Parent=PAC:16423830;pacid=16423830
						supercontig_61	phytozomev11	CDS	386720	387083	.	-	1	ID=PAC:16423830.CDS.5;Parent=PAC:16423830;pacid=16423830
						supercontig_61	phytozomev11	CDS	385797	385862	.	-	1	ID=PAC:16423830.CDS.6;Parent=PAC:16423830;pacid=16423830
						supercontig_21	phytozomev11	gene	1717344	1719535	.	+	.	ID=evm.TU.supercontig_21.177;Name=evm.TU.supercontig_21.177
						supercontig_21	phytozomev11	mRNA	1717344	1719535	.	+	.	ID=PAC:16413455;Name=evm.model.supercontig_21.177;pacid=16413455;longest=1;Parent=evm.TU.supercontig_21.177
						supercontig_21	phytozomev11	CDS	1717344	1717694	.	+	0	ID=PAC:16413455.CDS.1;Parent=PAC:16413455;pacid=16413455
						supercontig_21	phytozomev11	CDS	1718808	1719299	.	+	1	ID=PAC:16413455.CDS.2;Parent=PAC:16413455;pacid=16413455
						supercontig_21	phytozomev11	CDS	1719506	1719535	.	+	1	ID=PAC:16413455.CDS.3;Parent=PAC:16413455;pacid=16413455
						supercontig_200	phytozomev11	gene	310261	313758	.	+	.	ID=evm.TU.supercontig_200.36;Name=evm.TU.supercontig_200.36
						supercontig_200	phytozomev11	mRNA	310261	313758	.	+	.	ID=PAC:16413159;Name=evm.model.supercontig_200.36;pacid=16413159;longest=1;Parent=evm.TU.supercontig_200.36
						supercontig_200	phytozomev11	CDS	310261	310710	.	+	1	ID=PAC:16413159.CDS.1;Parent=PAC:16413159;pacid=16413159
						supercontig_200	phytozomev11	CDS	313324	313758	.	+	1	ID=PAC:16413159.CDS.2;Parent=PAC:16413159;pacid=16413159
						supercontig_1383	phytozomev11	gene	15049	16007	.	-	.	ID=evm.TU.supercontig_1383.2;Name=evm.TU.supercontig_1383.2
						supercontig_1383	phytozomev11	mRNA	15049	16007	.	-	.	ID=PAC:16408500;Name=evm.model.supercontig_1383.2;pacid=16408500;longest=1;Parent=evm.TU.supercontig_1383.2
						supercontig_1383	phytozomev11	CDS	15561	16007	.	-	1	ID=PAC:16408500.CDS.1;Parent=PAC:16408500;pacid=16408500
						supercontig_1383	phytozomev11	CDS	15049	15117	.	-	0	ID=PAC:16408500.CDS.2;Parent=PAC:16408500;pacid=16408500
						contig_34101	phytozomev11	gene	3376	3648	.	-	.	ID=evm.TU.contig_34101;Name=evm.TU.contig_34101
						contig_34101	phytozomev11	mRNA	3376	3648	.	-	.	ID=PAC:16430393;Name=evm.TU.contig_34101.1;pacid=16430393;longest=1;Parent=evm.TU.contig_34101
						contig_34101	phytozomev11	CDS	3376	3648	.	-	1	ID=PAC:16430393.CDS.1;Parent=PAC:16430393;pacid=16430393
						supercontig_19	phytozomev11	gene	661654	662762	.	-	.	ID=evm.TU.supercontig_19.98;Name=evm.TU.supercontig_19.98
						supercontig_19	phytozomev11	mRNA	661654	662762	.	-	.	ID=PAC:16412113;Name=evm.model.supercontig_19.98;pacid=16412113;longest=1;Parent=evm.TU.supercontig_19.98
						supercontig_19	phytozomev11	CDS	662685	662762	.	-	0	ID=PAC:16412113.CDS.1;Parent=PAC:16412113;pacid=16412113
						supercontig_19	phytozomev11	CDS	662252	662389	.	-	0	ID=PAC:16412113.CDS.2;Parent=PAC:16412113;pacid=16412113
						supercontig_19	phytozomev11	CDS	661965	662138	.	-	0	ID=PAC:16412113.CDS.3;Parent=PAC:16412113;pacid=16412113
						supercontig_19	phytozomev11	CDS	661654	661752	.	-	0	ID=PAC:16412113.CDS.4;Parent=PAC:16412113;pacid=16412113
						contig_30141	phytozomev11	gene	8494	10069	.	+	.	ID=gevm.TU.contig_30141.2;Name=evm.TU.contig_30141.2
						contig_30141	phytozomev11	mRNA	8494	10069	.	+	.	ID=PAC:16429792;Name=evm.TU.contig_30141.2;pacid=16429792;longest=1;Parent=gevm.TU.contig_30141.2
						contig_30141	phytozomev11	CDS	8494	8564	.	+	0	ID=PAC:16429792.CDS.1;Parent=PAC:16429792;pacid=16429792
						contig_30141	phytozomev11	CDS	9113	9216	.	+	1	ID=PAC:16429792.CDS.2;Parent=PAC:16429792;pacid=16429792
						contig_30141	phytozomev11	CDS	9392	9519	.	+	1	ID=PAC:16429792.CDS.3;Parent=PAC:16429792;pacid=16429792
						contig_30141	phytozomev11	CDS	9629	10069	.	+	1	ID=PAC:16429792.CDS.4;Parent=PAC:16429792;pacid=16429792
						supercontig_17	phytozomev11	gene	1957443	1959068	.	-	.	ID=evm.TU.supercontig_17.155;Name=evm.TU.supercontig_17.155
						supercontig_17	phytozomev11	mRNA	1957443	1959068	.	-	.	ID=PAC:16410650;Name=evm.model.supercontig_17.155;pacid=16410650;longest=1;Parent=evm.TU.supercontig_17.155
						supercontig_17	phytozomev11	CDS	1958954	1959068	.	-	0	ID=PAC:16410650.CDS.1;Parent=PAC:16410650;pacid=16410650
						supercontig_17	phytozomev11	CDS	1958288	1958415	.	-	1	ID=PAC:16410650.CDS.2;Parent=PAC:16410650;pacid=16410650
						supercontig_17	phytozomev11	CDS	1957711	1958193	.	-	1	ID=PAC:16410650.CDS.3;Parent=PAC:16410650;pacid=16410650
						supercontig_17	phytozomev11	CDS	1957443	1957622	.	-	0	ID=PAC:16410650.CDS.4;Parent=PAC:16410650;pacid=16410650
						supercontig_6	phytozomev11	gene	2004988	2006740	.	-	.	ID=evm.TU.supercontig_6.255;Name=evm.TU.supercontig_6.255
						supercontig_6	phytozomev11	mRNA	2004988	2006740	.	-	.	ID=PAC:16423437;Name=evm.model.supercontig_6.255;pacid=16423437;longest=1;Parent=evm.TU.supercontig_6.255
						supercontig_6	phytozomev11	CDS	2006625	2006740	.	-	0	ID=PAC:16423437.CDS.1;Parent=PAC:16423437;pacid=16423437
						supercontig_6	phytozomev11	CDS	2005987	2006123	.	-	0	ID=PAC:16423437.CDS.2;Parent=PAC:16423437;pacid=16423437
						supercontig_6	phytozomev11	CDS	2005240	2005367	.	-	1	ID=PAC:16423437.CDS.3;Parent=PAC:16423437;pacid=16423437
						supercontig_6	phytozomev11	CDS	2005100	2005153	.	-	1	ID=PAC:16423437.CDS.4;Parent=PAC:16423437;pacid=16423437
						supercontig_6	phytozomev11	CDS	2004988	2005011	.	-	1	ID=PAC:16423437.CDS.5;Parent=PAC:16423437;pacid=16423437
						supercontig_44	phytozomev11	gene	923389	927518	.	+	.	ID=evm.TU.supercontig_44.78;Name=evm.TU.supercontig_44.78
						supercontig_44	phytozomev11	mRNA	923389	927518	.	+	.	ID=PAC:16420220;Name=evm.model.supercontig_44.78;pacid=16420220;longest=1;Parent=evm.TU.supercontig_44.78
						supercontig_44	phytozomev11	CDS	923389	923483	.	+	0	ID=PAC:16420220.CDS.1;Parent=PAC:16420220;pacid=16420220
						supercontig_44	phytozomev11	CDS	923917	923997	.	+	1	ID=PAC:16420220.CDS.2;Parent=PAC:16420220;pacid=16420220
						supercontig_44	phytozomev11	CDS	924459	924536	.	+	0	ID=PAC:16420220.CDS.3;Parent=PAC:16420220;pacid=16420220
						supercontig_44	phytozomev11	CDS	924665	924827	.	+	0	ID=PAC:16420220.CDS.4;Parent=PAC:16420220;pacid=16420220
						supercontig_44	phytozomev11	CDS	927270	927518	.	+	1	ID=PAC:16420220.CDS.5;Parent=PAC:16420220;pacid=16420220
						supercontig_97	phytozomev11	gene	488487	489511	.	-	.	ID=evm.TU.supercontig_97.78;Name=evm.TU.supercontig_97.78
						supercontig_97	phytozomev11	mRNA	488487	489511	.	-	.	ID=PAC:16429117;Name=evm.model.supercontig_97.78;pacid=16429117;longest=1;Parent=evm.TU.supercontig_97.78
						supercontig_97	phytozomev11	CDS	489471	489511	.	-	1	ID=PAC:16429117.CDS.1;Parent=PAC:16429117;pacid=16429117
						supercontig_97	phytozomev11	CDS	489085	489162	.	-	0	ID=PAC:16429117.CDS.2;Parent=PAC:16429117;pacid=16429117
						supercontig_97	phytozomev11	CDS	488852	489014	.	-	0	ID=PAC:16429117.CDS.3;Parent=PAC:16429117;pacid=16429117
						supercontig_97	phytozomev11	CDS	488487	488750	.	-	1	ID=PAC:16429117.CDS.4;Parent=PAC:16429117;pacid=16429117
						supercontig_81	phytozomev11	gene	54059	55806	.	+	.	ID=evm.TU.supercontig_81.11;Name=evm.TU.supercontig_81.11
						supercontig_81	phytozomev11	mRNA	54059	55806	.	+	.	ID=PAC:16426864;Name=evm.model.supercontig_81.11;pacid=16426864;longest=1;Parent=evm.TU.supercontig_81.11
						supercontig_81	phytozomev11	CDS	54059	54216	.	+	0	ID=PAC:16426864.CDS.1;Parent=PAC:16426864;pacid=16426864
						supercontig_81	phytozomev11	CDS	54852	54914	.	+	0	ID=PAC:16426864.CDS.2;Parent=PAC:16426864;pacid=16426864
						supercontig_81	phytozomev11	CDS	55071	55148	.	+	1	ID=PAC:16426864.CDS.3;Parent=PAC:16426864;pacid=16426864
						supercontig_81	phytozomev11	CDS	55244	55406	.	+	1	ID=PAC:16426864.CDS.4;Parent=PAC:16426864;pacid=16426864
						supercontig_81	phytozomev11	CDS	55540	55806	.	+	0	ID=PAC:16426864.CDS.5;Parent=PAC:16426864;pacid=16426864
						supercontig_20	phytozomev11	gene	670607	672588	.	+	.	ID=evm.TU.supercontig_20.63;Name=evm.TU.supercontig_20.63
						supercontig_20	phytozomev11	mRNA	670607	672588	.	+	.	ID=PAC:16413090;Name=evm.model.supercontig_20.63;pacid=16413090;longest=1;Parent=evm.TU.supercontig_20.63
						supercontig_20	phytozomev11	CDS	670607	670642	.	+	1	ID=PAC:16413090.CDS.1;Parent=PAC:16413090;pacid=16413090
						supercontig_20	phytozomev11	CDS	670758	671315	.	+	1	ID=PAC:16413090.CDS.2;Parent=PAC:16413090;pacid=16413090
						supercontig_20	phytozomev11	CDS	671718	672095	.	+	1	ID=PAC:16413090.CDS.3;Parent=PAC:16413090;pacid=16413090
						supercontig_20	phytozomev11	CDS	672514	672588	.	+	1	ID=PAC:16413090.CDS.4;Parent=PAC:16413090;pacid=16413090
						supercontig_129	phytozomev11	gene	292613	294186	.	+	.	ID=evm.TU.supercontig_129.37;Name=evm.TU.supercontig_129.37
						supercontig_129	phytozomev11	mRNA	292613	294186	.	+	.	ID=PAC:16407539;Name=evm.model.supercontig_129.37;pacid=16407539;longest=1;Parent=evm.TU.supercontig_129.37
						supercontig_129	phytozomev11	CDS	292613	292648	.	+	0	ID=PAC:16407539.CDS.1;Parent=PAC:16407539;pacid=16407539
						supercontig_129	phytozomev11	CDS	292842	293489	.	+	0	ID=PAC:16407539.CDS.2;Parent=PAC:16407539;pacid=16407539
						supercontig_129	phytozomev11	CDS	293622	293996	.	+	0	ID=PAC:16407539.CDS.3;Parent=PAC:16407539;pacid=16407539
						supercontig_129	phytozomev11	CDS	294112	294186	.	+	1	ID=PAC:16407539.CDS.4;Parent=PAC:16407539;pacid=16407539
						supercontig_537	phytozomev11	gene	26472	30020	.	+	.	ID=evm.TU.supercontig_537.2;Name=evm.TU.supercontig_537.2
						supercontig_537	phytozomev11	mRNA	26472	30020	.	+	.	ID=PAC:16422355;Name=evm.model.supercontig_537.2;pacid=16422355;longest=1;Parent=evm.TU.supercontig_537.2
						supercontig_537	phytozomev11	CDS	26472	26596	.	+	1	ID=PAC:16422355.CDS.1;Parent=PAC:16422355;pacid=16422355
						supercontig_537	phytozomev11	CDS	27260	27514	.	+	0	ID=PAC:16422355.CDS.2;Parent=PAC:16422355;pacid=16422355
						supercontig_537	phytozomev11	CDS	27597	27693	.	+	1	ID=PAC:16422355.CDS.3;Parent=PAC:16422355;pacid=16422355
						supercontig_537	phytozomev11	CDS	28273	28329	.	+	0	ID=PAC:16422355.CDS.4;Parent=PAC:16422355;pacid=16422355
						supercontig_537	phytozomev11	CDS	28439	29293	.	+	1	ID=PAC:16422355.CDS.5;Parent=PAC:16422355;pacid=16422355
						supercontig_537	phytozomev11	CDS	29373	29816	.	+	0	ID=PAC:16422355.CDS.6;Parent=PAC:16422355;pacid=16422355
						supercontig_537	phytozomev11	CDS	29949	30020	.	+	0	ID=PAC:16422355.CDS.7;Parent=PAC:16422355;pacid=16422355
						supercontig_52	phytozomev11	gene	204697	209015	.	+	.	ID=evm.TU.supercontig_52.26;Name=evm.TU.supercontig_52.26
						supercontig_52	phytozomev11	mRNA	204697	209015	.	+	.	ID=PAC:16422047;Name=evm.model.supercontig_52.26;pacid=16422047;longest=1;Parent=evm.TU.supercontig_52.26
						supercontig_52	phytozomev11	CDS	204697	204800	.	+	1	ID=PAC:16422047.CDS.1;Parent=PAC:16422047;pacid=16422047
						supercontig_52	phytozomev11	CDS	204930	205184	.	+	1	ID=PAC:16422047.CDS.2;Parent=PAC:16422047;pacid=16422047
						supercontig_52	phytozomev11	CDS	206125	206221	.	+	0	ID=PAC:16422047.CDS.3;Parent=PAC:16422047;pacid=16422047
						supercontig_52	phytozomev11	CDS	206575	206661	.	+	1	ID=PAC:16422047.CDS.4;Parent=PAC:16422047;pacid=16422047
						supercontig_52	phytozomev11	CDS	206809	207364	.	+	0	ID=PAC:16422047.CDS.5;Parent=PAC:16422047;pacid=16422047
						supercontig_52	phytozomev11	CDS	207831	208690	.	+	0	ID=PAC:16422047.CDS.6;Parent=PAC:16422047;pacid=16422047
						supercontig_52	phytozomev11	CDS	208935	209015	.	+	0	ID=PAC:16422047.CDS.7;Parent=PAC:16422047;pacid=16422047
						supercontig_71	phytozomev11	gene	1092877	1094841	.	+	.	ID=evm.TU.supercontig_71.72;Name=evm.TU.supercontig_71.72
						supercontig_71	phytozomev11	mRNA	1092877	1094841	.	+	.	ID=PAC:16425484;Name=evm.model.supercontig_71.72;pacid=16425484;longest=1;Parent=evm.TU.supercontig_71.72
						supercontig_71	phytozomev11	CDS	1092877	1094841	.	+	1	ID=PAC:16425484.CDS.1;Parent=PAC:16425484;pacid=16425484
						contig_45808	phytozomev11	gene	453	1235	.	-	.	ID=evm.TU.contig_45808;Name=evm.TU.contig_45808
						contig_45808	phytozomev11	mRNA	453	1235	.	-	.	ID=PAC:16432224;Name=evm.TU.contig_45808.1;pacid=16432224;longest=1;Parent=evm.TU.contig_45808
						contig_45808	phytozomev11	CDS	453	1235	.	-	1	ID=PAC:16432224.CDS.1;Parent=PAC:16432224;pacid=16432224
						supercontig_141	phytozomev11	gene	982728	984215	.	-	.	ID=evm.TU.supercontig_141.19;Name=evm.TU.supercontig_141.19
						supercontig_141	phytozomev11	mRNA	982728	984215	.	-	.	ID=PAC:16408921;Name=evm.model.supercontig_141.19;pacid=16408921;longest=1;Parent=evm.TU.supercontig_141.19
						supercontig_141	phytozomev11	CDS	982728	984215	.	-	1	ID=PAC:16408921.CDS.1;Parent=PAC:16408921;pacid=16408921
						supercontig_1892	phytozomev11	gene	8033	9460	.	+	.	ID=evm.TU.supercontig_1892.1;Name=evm.TU.supercontig_1892.1
						supercontig_1892	phytozomev11	mRNA	8033	9460	.	+	.	ID=PAC:16411824;Name=evm.model.supercontig_1892.1;pacid=16411824;longest=1;Parent=evm.TU.supercontig_1892.1
						supercontig_1892	phytozomev11	CDS	8033	9460	.	+	1	ID=PAC:16411824.CDS.1;Parent=PAC:16411824;pacid=16411824
						contig_28125	phytozomev11	gene	3446	4662	.	+	.	ID=gevm.TU.contig_28125.2;Name=evm.TU.contig_28125.2
						contig_28125	phytozomev11	mRNA	3446	4662	.	+	.	ID=PAC:16429552;Name=evm.TU.contig_28125.2;pacid=16429552;longest=1;Parent=gevm.TU.contig_28125.2
						contig_28125	phytozomev11	CDS	3446	3829	.	+	1	ID=PAC:16429552.CDS.1;Parent=PAC:16429552;pacid=16429552
						contig_28125	phytozomev11	CDS	3924	4115	.	+	1	ID=PAC:16429552.CDS.2;Parent=PAC:16429552;pacid=16429552
						contig_28125	phytozomev11	CDS	4290	4463	.	+	1	ID=PAC:16429552.CDS.3;Parent=PAC:16429552;pacid=16429552
						contig_28125	phytozomev11	CDS	4573	4662	.	+	1	ID=PAC:16429552.CDS.4;Parent=PAC:16429552;pacid=16429552
						supercontig_69	phytozomev11	gene	651484	655515	.	-	.	ID=evm.TU.supercontig_69.52;Name=evm.TU.supercontig_69.52
						supercontig_69	phytozomev11	mRNA	651484	655515	.	-	.	ID=PAC:16424923;Name=evm.model.supercontig_69.52;pacid=16424923;longest=1;Parent=evm.TU.supercontig_69.52
						supercontig_69	phytozomev11	CDS	655017	655515	.	-	1	ID=PAC:16424923.CDS.1;Parent=PAC:16424923;pacid=16424923
						supercontig_69	phytozomev11	CDS	654730	654802	.	-	0	ID=PAC:16424923.CDS.2;Parent=PAC:16424923;pacid=16424923
						supercontig_69	phytozomev11	CDS	654110	654247	.	-	1	ID=PAC:16424923.CDS.3;Parent=PAC:16424923;pacid=16424923
						supercontig_69	phytozomev11	CDS	653913	654008	.	-	1	ID=PAC:16424923.CDS.4;Parent=PAC:16424923;pacid=16424923
						supercontig_69	phytozomev11	CDS	653522	653585	.	-	1	ID=PAC:16424923.CDS.5;Parent=PAC:16424923;pacid=16424923
						supercontig_69	phytozomev11	CDS	653087	653155	.	-	1	ID=PAC:16424923.CDS.6;Parent=PAC:16424923;pacid=16424923
						supercontig_69	phytozomev11	CDS	652393	652944	.	-	0	ID=PAC:16424923.CDS.7;Parent=PAC:16424923;pacid=16424923
						supercontig_69	phytozomev11	CDS	652070	652300	.	-	0	ID=PAC:16424923.CDS.8;Parent=PAC:16424923;pacid=16424923
						supercontig_69	phytozomev11	CDS	651772	651948	.	-	1	ID=PAC:16424923.CDS.9;Parent=PAC:16424923;pacid=16424923
						supercontig_69	phytozomev11	CDS	651484	651585	.	-	0	ID=PAC:16424923.CDS.10;Parent=PAC:16424923;pacid=16424923
						supercontig_115	phytozomev11	gene	1058623	1063835	.	+	.	ID=evm.TU.supercontig_115.71;Name=evm.TU.supercontig_115.71
						supercontig_115	phytozomev11	mRNA	1058623	1063835	.	+	.	ID=PAC:16406239;Name=evm.model.supercontig_115.71;pacid=16406239;longest=1;Parent=evm.TU.supercontig_115.71
						supercontig_115	phytozomev11	CDS	1058623	1058702	.	+	0	ID=PAC:16406239.CDS.1;Parent=PAC:16406239;pacid=16406239
						supercontig_115	phytozomev11	CDS	1058800	1058965	.	+	0	ID=PAC:16406239.CDS.2;Parent=PAC:16406239;pacid=16406239
						supercontig_115	phytozomev11	CDS	1059163	1059396	.	+	0	ID=PAC:16406239.CDS.3;Parent=PAC:16406239;pacid=16406239
						supercontig_115	phytozomev11	CDS	1059529	1059699	.	+	0	ID=PAC:16406239.CDS.4;Parent=PAC:16406239;pacid=16406239
						supercontig_115	phytozomev11	CDS	1063743	1063835	.	+	1	ID=PAC:16406239.CDS.5;Parent=PAC:16406239;pacid=16406239
						supercontig_20	phytozomev11	gene	1073352	1076081	.	+	.	ID=evm.TU.supercontig_20.95;Name=evm.TU.supercontig_20.95
						supercontig_20	phytozomev11	mRNA	1073352	1076081	.	+	.	ID=PAC:16413125;Name=evm.model.supercontig_20.95;pacid=16413125;longest=1;Parent=evm.TU.supercontig_20.95
						supercontig_20	phytozomev11	CDS	1073352	1073452	.	+	1	ID=PAC:16413125.CDS.1;Parent=PAC:16413125;pacid=16413125
						supercontig_20	phytozomev11	CDS	1073561	1073761	.	+	0	ID=PAC:16413125.CDS.2;Parent=PAC:16413125;pacid=16413125
						supercontig_20	phytozomev11	CDS	1073858	1073945	.	+	1	ID=PAC:16413125.CDS.3;Parent=PAC:16413125;pacid=16413125
						supercontig_20	phytozomev11	CDS	1074061	1074129	.	+	1	ID=PAC:16413125.CDS.4;Parent=PAC:16413125;pacid=16413125
						supercontig_20	phytozomev11	CDS	1074329	1075093	.	+	0	ID=PAC:16413125.CDS.5;Parent=PAC:16413125;pacid=16413125
						supercontig_20	phytozomev11	CDS	1075172	1075528	.	+	1	ID=PAC:16413125.CDS.6;Parent=PAC:16413125;pacid=16413125
						supercontig_20	phytozomev11	CDS	1075707	1075820	.	+	0	ID=PAC:16413125.CDS.7;Parent=PAC:16413125;pacid=16413125
						supercontig_20	phytozomev11	CDS	1075896	1076081	.	+	0	ID=PAC:16413125.CDS.8;Parent=PAC:16413125;pacid=16413125
						supercontig_70	phytozomev11	gene	514294	517768	.	-	.	ID=evm.TU.supercontig_70.77;Name=evm.TU.supercontig_70.77
						supercontig_70	phytozomev11	mRNA	514294	517768	.	-	.	ID=PAC:16425365;Name=evm.model.supercontig_70.77;pacid=16425365;longest=1;Parent=evm.TU.supercontig_70.77
						supercontig_70	phytozomev11	CDS	516593	517768	.	-	0	ID=PAC:16425365.CDS.1;Parent=PAC:16425365;pacid=16425365
						supercontig_70	phytozomev11	CDS	515808	516029	.	-	0	ID=PAC:16425365.CDS.2;Parent=PAC:16425365;pacid=16425365
						supercontig_70	phytozomev11	CDS	514638	514808	.	-	0	ID=PAC:16425365.CDS.3;Parent=PAC:16425365;pacid=16425365
						supercontig_70	phytozomev11	CDS	514294	514377	.	-	1	ID=PAC:16425365.CDS.4;Parent=PAC:16425365;pacid=16425365
						supercontig_1024	phytozomev11	gene	6939	10301	.	-	.	ID=evm.TU.supercontig_1024.1;Name=evm.TU.supercontig_1024.1
						supercontig_1024	phytozomev11	mRNA	6939	10301	.	-	.	ID=PAC:16404871;Name=evm.model.supercontig_1024.1;pacid=16404871;longest=1;Parent=evm.TU.supercontig_1024.1
						supercontig_1024	phytozomev11	CDS	9171	10301	.	-	1	ID=PAC:16404871.CDS.1;Parent=PAC:16404871;pacid=16404871
						supercontig_1024	phytozomev11	CDS	7344	7574	.	-	0	ID=PAC:16404871.CDS.2;Parent=PAC:16404871;pacid=16404871
						supercontig_1024	phytozomev11	CDS	6939	7109	.	-	1	ID=PAC:16404871.CDS.3;Parent=PAC:16404871;pacid=16404871
						supercontig_177	phytozomev11	gene	9809	11344	.	-	.	ID=evm.TU.supercontig_177.1;Name=evm.TU.supercontig_177.1
						supercontig_177	phytozomev11	mRNA	9809	11344	.	-	.	ID=PAC:16411106;Name=evm.model.supercontig_177.1;pacid=16411106;longest=1;Parent=evm.TU.supercontig_177.1
						supercontig_177	phytozomev11	CDS	10736	11344	.	-	1	ID=PAC:16411106.CDS.1;Parent=PAC:16411106;pacid=16411106
						supercontig_177	phytozomev11	CDS	10333	10509	.	-	0	ID=PAC:16411106.CDS.2;Parent=PAC:16411106;pacid=16411106
						supercontig_177	phytozomev11	CDS	10061	10228	.	-	1	ID=PAC:16411106.CDS.3;Parent=PAC:16411106;pacid=16411106
						supercontig_177	phytozomev11	CDS	9809	9895	.	-	1	ID=PAC:16411106.CDS.4;Parent=PAC:16411106;pacid=16411106
						supercontig_129	phytozomev11	gene	150639	151965	.	+	.	ID=evm.TU.supercontig_129.19;Name=evm.TU.supercontig_129.19
						supercontig_129	phytozomev11	mRNA	150639	151965	.	+	.	ID=PAC:16407519;Name=evm.model.supercontig_129.19;pacid=16407519;longest=1;Parent=evm.TU.supercontig_129.19
						supercontig_129	phytozomev11	CDS	150639	151205	.	+	0	ID=PAC:16407519.CDS.1;Parent=PAC:16407519;pacid=16407519
						supercontig_129	phytozomev11	CDS	151335	151505	.	+	1	ID=PAC:16407519.CDS.2;Parent=PAC:16407519;pacid=16407519
						supercontig_129	phytozomev11	CDS	151594	151761	.	+	0	ID=PAC:16407519.CDS.3;Parent=PAC:16407519;pacid=16407519
						supercontig_129	phytozomev11	CDS	151879	151965	.	+	0	ID=PAC:16407519.CDS.4;Parent=PAC:16407519;pacid=16407519
						contig_31184	phytozomev11	gene	3289	4959	.	+	.	ID=evm.TU.contig_31184;Name=evm.TU.contig_31184
						contig_31184	phytozomev11	mRNA	3289	4959	.	+	.	ID=PAC:16429949;Name=evm.TU.contig_31184.1;pacid=16429949;longest=1;Parent=evm.TU.contig_31184
						contig_31184	phytozomev11	CDS	3289	3411	.	+	1	ID=PAC:16429949.CDS.1;Parent=PAC:16429949;pacid=16429949
						contig_31184	phytozomev11	CDS	3863	3991	.	+	0	ID=PAC:16429949.CDS.2;Parent=PAC:16429949;pacid=16429949
						contig_31184	phytozomev11	CDS	4216	4959	.	+	1	ID=PAC:16429949.CDS.3;Parent=PAC:16429949;pacid=16429949
						supercontig_1175	phytozomev11	gene	4669	5355	.	+	.	ID=evm.TU.supercontig_1175.1;Name=evm.TU.supercontig_1175.1
						supercontig_1175	phytozomev11	mRNA	4669	5355	.	+	.	ID=PAC:16406458;Name=evm.model.supercontig_1175.1;pacid=16406458;longest=1;Parent=evm.TU.supercontig_1175.1
						supercontig_1175	phytozomev11	CDS	4669	5355	.	+	0	ID=PAC:16406458.CDS.1;Parent=PAC:16406458;pacid=16406458
						supercontig_53	phytozomev11	gene	991225	993377	.	-	.	ID=evm.TU.supercontig_53.118;Name=evm.TU.supercontig_53.118
						supercontig_53	phytozomev11	mRNA	991225	993377	.	-	.	ID=PAC:16422179;Name=evm.model.supercontig_53.118;pacid=16422179;longest=1;Parent=evm.TU.supercontig_53.118
						supercontig_53	phytozomev11	CDS	992799	993377	.	-	1	ID=PAC:16422179.CDS.1;Parent=PAC:16422179;pacid=16422179
						supercontig_53	phytozomev11	CDS	991225	991686	.	-	0	ID=PAC:16422179.CDS.2;Parent=PAC:16422179;pacid=16422179
						supercontig_21	phytozomev11	gene	172224	172970	.	-	.	ID=evm.TU.supercontig_21.7;Name=evm.TU.supercontig_21.7
						supercontig_21	phytozomev11	mRNA	172224	172970	.	-	.	ID=PAC:16413583;Name=evm.model.supercontig_21.7;pacid=16413583;longest=1;Parent=evm.TU.supercontig_21.7
						supercontig_21	phytozomev11	CDS	172779	172970	.	-	0	ID=PAC:16413583.CDS.1;Parent=PAC:16413583;pacid=16413583
						supercontig_21	phytozomev11	CDS	172224	172691	.	-	0	ID=PAC:16413583.CDS.2;Parent=PAC:16413583;pacid=16413583
						supercontig_7	phytozomev11	gene	531273	534095	.	+	.	ID=evm.TU.supercontig_7.53;Name=evm.TU.supercontig_7.53
						supercontig_7	phytozomev11	mRNA	531273	534095	.	+	.	ID=PAC:16425215;Name=evm.model.supercontig_7.53;pacid=16425215;longest=1;Parent=evm.TU.supercontig_7.53
						supercontig_7	phytozomev11	CDS	531273	531581	.	+	0	ID=PAC:16425215.CDS.1;Parent=PAC:16425215;pacid=16425215
						supercontig_7	phytozomev11	CDS	533619	534095	.	+	1	ID=PAC:16425215.CDS.2;Parent=PAC:16425215;pacid=16425215
						supercontig_92	phytozomev11	gene	700884	702478	.	-	.	ID=evm.TU.supercontig_92.83;Name=evm.TU.supercontig_92.83
						supercontig_92	phytozomev11	mRNA	700884	702478	.	-	.	ID=PAC:16428657;Name=evm.model.supercontig_92.83;pacid=16428657;longest=1;Parent=evm.TU.supercontig_92.83
						supercontig_92	phytozomev11	CDS	702194	702478	.	-	0	ID=PAC:16428657.CDS.1;Parent=PAC:16428657;pacid=16428657
						supercontig_92	phytozomev11	CDS	700884	701312	.	-	1	ID=PAC:16428657.CDS.2;Parent=PAC:16428657;pacid=16428657
						supercontig_19	phytozomev11	gene	1014391	1015706	.	-	.	ID=evm.TU.supercontig_19.156;Name=evm.TU.supercontig_19.156
						supercontig_19	phytozomev11	mRNA	1014391	1015706	.	-	.	ID=PAC:16411890;Name=evm.model.supercontig_19.156;pacid=16411890;longest=1;Parent=evm.TU.supercontig_19.156
						supercontig_19	phytozomev11	CDS	1015413	1015706	.	-	1	ID=PAC:16411890.CDS.1;Parent=PAC:16411890;pacid=16411890
						supercontig_19	phytozomev11	CDS	1014391	1014840	.	-	1	ID=PAC:16411890.CDS.2;Parent=PAC:16411890;pacid=16411890
						supercontig_55	phytozomev11	gene	289989	290929	.	-	.	ID=evm.TU.supercontig_55.51;Name=evm.TU.supercontig_55.51
						supercontig_55	phytozomev11	mRNA	289989	290929	.	-	.	ID=PAC:16422618;Name=evm.model.supercontig_55.51;pacid=16422618;longest=1;Parent=evm.TU.supercontig_55.51
						supercontig_55	phytozomev11	CDS	290678	290929	.	-	0	ID=PAC:16422618.CDS.1;Parent=PAC:16422618;pacid=16422618
						supercontig_55	phytozomev11	CDS	289989	290396	.	-	0	ID=PAC:16422618.CDS.2;Parent=PAC:16422618;pacid=16422618
						supercontig_489	phytozomev11	gene	24124	25116	.	+	.	ID=evm.TU.supercontig_489.6;Name=evm.TU.supercontig_489.6
						supercontig_489	phytozomev11	mRNA	24124	25116	.	+	.	ID=PAC:16421005;Name=evm.model.supercontig_489.6;pacid=16421005;longest=1;Parent=evm.TU.supercontig_489.6
						supercontig_489	phytozomev11	CDS	24124	24840	.	+	0	ID=PAC:16421005.CDS.1;Parent=PAC:16421005;pacid=16421005
						supercontig_489	phytozomev11	CDS	24913	25116	.	+	1	ID=PAC:16421005.CDS.2;Parent=PAC:16421005;pacid=16421005
						supercontig_489	phytozomev11	gene	20533	21207	.	-	.	ID=evm.TU.supercontig_489.5;Name=evm.TU.supercontig_489.5
						supercontig_489	phytozomev11	mRNA	20533	21207	.	-	.	ID=PAC:16421004;Name=evm.model.supercontig_489.5;pacid=16421004;longest=1;Parent=evm.TU.supercontig_489.5
						supercontig_489	phytozomev11	CDS	20533	21207	.	-	0	ID=PAC:16421004.CDS.1;Parent=PAC:16421004;pacid=16421004
						supercontig_8	phytozomev11	gene	1779447	1780490	.	-	.	ID=evm.TU.supercontig_8.253;Name=evm.TU.supercontig_8.253
						supercontig_8	phytozomev11	mRNA	1779447	1780490	.	-	.	ID=PAC:16426545;Name=evm.model.supercontig_8.253;pacid=16426545;longest=1;Parent=evm.TU.supercontig_8.253
						supercontig_8	phytozomev11	CDS	1779447	1780490	.	-	1	ID=PAC:16426545.CDS.1;Parent=PAC:16426545;pacid=16426545
						supercontig_55	phytozomev11	gene	890017	890886	.	+	.	ID=evm.TU.supercontig_55.142;Name=evm.TU.supercontig_55.142
						supercontig_55	phytozomev11	mRNA	890017	890886	.	+	.	ID=PAC:16422531;Name=evm.model.supercontig_55.142;pacid=16422531;longest=1;Parent=evm.TU.supercontig_55.142
						supercontig_55	phytozomev11	CDS	890017	890886	.	+	1	ID=PAC:16422531.CDS.1;Parent=PAC:16422531;pacid=16422531
						supercontig_49	phytozomev11	gene	179478	180245	.	-	.	ID=evm.TU.supercontig_49.31;Name=evm.TU.supercontig_49.31
						supercontig_49	phytozomev11	mRNA	179478	180245	.	-	.	ID=PAC:16421099;Name=evm.model.supercontig_49.31;pacid=16421099;longest=1;Parent=evm.TU.supercontig_49.31
						supercontig_49	phytozomev11	CDS	179478	180245	.	-	0	ID=PAC:16421099.CDS.1;Parent=PAC:16421099;pacid=16421099
						contig_46440	phytozomev11	gene	26	587	.	-	.	ID=evm.TU.contig_46440;Name=evm.TU.contig_46440
						contig_46440	phytozomev11	mRNA	26	587	.	-	.	ID=PAC:16432300;Name=evm.TU.contig_46440.1;pacid=16432300;longest=1;Parent=evm.TU.contig_46440
						contig_46440	phytozomev11	CDS	26	587	.	-	1	ID=PAC:16432300.CDS.1;Parent=PAC:16432300;pacid=16432300
						supercontig_131	phytozomev11	gene	41796	43052	.	-	.	ID=evm.TU.supercontig_131.7;Name=evm.TU.supercontig_131.7
						supercontig_131	phytozomev11	mRNA	41796	43052	.	-	.	ID=PAC:16408067;Name=evm.model.supercontig_131.7;pacid=16408067;longest=1;Parent=evm.TU.supercontig_131.7
						supercontig_131	phytozomev11	CDS	41796	43052	.	-	0	ID=PAC:16408067.CDS.1;Parent=PAC:16408067;pacid=16408067
						supercontig_120	phytozomev11	gene	392576	393079	.	-	.	ID=evm.TU.supercontig_120.27;Name=evm.TU.supercontig_120.27
						supercontig_120	phytozomev11	mRNA	392576	393079	.	-	.	ID=PAC:16406963;Name=evm.model.supercontig_120.27;pacid=16406963;longest=1;Parent=evm.TU.supercontig_120.27
						supercontig_120	phytozomev11	CDS	392576	393079	.	-	0	ID=PAC:16406963.CDS.1;Parent=PAC:16406963;pacid=16406963
						contig_27490	phytozomev11	gene	11869	13395	.	+	.	ID=evm.TU.contig_27490;Name=evm.TU.contig_27490
						contig_27490	phytozomev11	mRNA	11869	13395	.	+	.	ID=PAC:16429497;Name=evm.TU.contig_27490.2;pacid=16429497;longest=1;Parent=evm.TU.contig_27490
						contig_27490	phytozomev11	CDS	11869	12450	.	+	1	ID=PAC:16429497.CDS.1;Parent=PAC:16429497;pacid=16429497
						contig_27490	phytozomev11	CDS	12697	12804	.	+	1	ID=PAC:16429497.CDS.2;Parent=PAC:16429497;pacid=16429497
						contig_27490	phytozomev11	CDS	12926	12991	.	+	1	ID=PAC:16429497.CDS.3;Parent=PAC:16429497;pacid=16429497
						contig_27490	phytozomev11	CDS	13087	13152	.	+	1	ID=PAC:16429497.CDS.4;Parent=PAC:16429497;pacid=16429497
						contig_27490	phytozomev11	CDS	13273	13395	.	+	1	ID=PAC:16429497.CDS.5;Parent=PAC:16429497;pacid=16429497
						supercontig_142	phytozomev11	gene	164331	165936	.	+	.	ID=evm.TU.supercontig_142.14;Name=evm.TU.supercontig_142.14
						supercontig_142	phytozomev11	mRNA	164331	165936	.	+	.	ID=PAC:16408941;Name=evm.model.supercontig_142.14;pacid=16408941;longest=1;Parent=evm.TU.supercontig_142.14
						supercontig_142	phytozomev11	CDS	164331	164921	.	+	1	ID=PAC:16408941.CDS.1;Parent=PAC:16408941;pacid=16408941
						supercontig_142	phytozomev11	CDS	165091	165327	.	+	0	ID=PAC:16408941.CDS.2;Parent=PAC:16408941;pacid=16408941
						supercontig_142	phytozomev11	CDS	165591	165722	.	+	1	ID=PAC:16408941.CDS.3;Parent=PAC:16408941;pacid=16408941
						supercontig_142	phytozomev11	CDS	165847	165936	.	+	1	ID=PAC:16408941.CDS.4;Parent=PAC:16408941;pacid=16408941
						supercontig_106	phytozomev11	gene	661082	662870	.	-	.	ID=evm.TU.supercontig_106.57;Name=evm.TU.supercontig_106.57
						supercontig_106	phytozomev11	mRNA	661082	662870	.	-	.	ID=PAC:16405223;Name=evm.model.supercontig_106.57;pacid=16405223;longest=1;Parent=evm.TU.supercontig_106.57
						supercontig_106	phytozomev11	CDS	662229	662870	.	-	0	ID=PAC:16405223.CDS.1;Parent=PAC:16405223;pacid=16405223
						supercontig_106	phytozomev11	CDS	661730	662023	.	-	0	ID=PAC:16405223.CDS.2;Parent=PAC:16405223;pacid=16405223
						supercontig_106	phytozomev11	CDS	661570	661635	.	-	0	ID=PAC:16405223.CDS.3;Parent=PAC:16405223;pacid=16405223
						supercontig_106	phytozomev11	CDS	661368	661433	.	-	0	ID=PAC:16405223.CDS.4;Parent=PAC:16405223;pacid=16405223
						supercontig_106	phytozomev11	CDS	661082	661177	.	-	0	ID=PAC:16405223.CDS.5;Parent=PAC:16405223;pacid=16405223
						supercontig_21	phytozomev11	gene	1711889	1714607	.	+	.	ID=evm.TU.supercontig_21.176;Name=evm.TU.supercontig_21.176
						supercontig_21	phytozomev11	mRNA	1711889	1714607	.	+	.	ID=PAC:16413454;Name=evm.model.supercontig_21.176;pacid=16413454;longest=1;Parent=evm.TU.supercontig_21.176
						supercontig_21	phytozomev11	CDS	1711889	1712284	.	+	0	ID=PAC:16413454.CDS.1;Parent=PAC:16413454;pacid=16413454
						supercontig_21	phytozomev11	CDS	1712533	1712628	.	+	0	ID=PAC:16413454.CDS.2;Parent=PAC:16413454;pacid=16413454
						supercontig_21	phytozomev11	CDS	1712734	1712799	.	+	0	ID=PAC:16413454.CDS.3;Parent=PAC:16413454;pacid=16413454
						supercontig_21	phytozomev11	CDS	1712896	1712961	.	+	0	ID=PAC:16413454.CDS.4;Parent=PAC:16413454;pacid=16413454
						supercontig_21	phytozomev11	CDS	1714116	1714436	.	+	0	ID=PAC:16413454.CDS.5;Parent=PAC:16413454;pacid=16413454
						supercontig_21	phytozomev11	CDS	1714530	1714607	.	+	1	ID=PAC:16413454.CDS.6;Parent=PAC:16413454;pacid=16413454
						supercontig_8	phytozomev11	gene	1397558	1404241	.	-	.	ID=evm.TU.supercontig_8.199;Name=evm.TU.supercontig_8.199
						supercontig_8	phytozomev11	mRNA	1397558	1404241	.	-	.	ID=PAC:16426484;Name=evm.model.supercontig_8.199;pacid=16426484;longest=1;Parent=evm.TU.supercontig_8.199
						supercontig_8	phytozomev11	CDS	1404177	1404241	.	-	0	ID=PAC:16426484.CDS.1;Parent=PAC:16426484;pacid=16426484
						supercontig_8	phytozomev11	CDS	1403990	1404091	.	-	1	ID=PAC:16426484.CDS.2;Parent=PAC:16426484;pacid=16426484
						supercontig_8	phytozomev11	CDS	1403023	1403878	.	-	1	ID=PAC:16426484.CDS.3;Parent=PAC:16426484;pacid=16426484
						supercontig_8	phytozomev11	CDS	1400059	1400157	.	-	1	ID=PAC:16426484.CDS.4;Parent=PAC:16426484;pacid=16426484
						supercontig_8	phytozomev11	CDS	1399907	1399972	.	-	0	ID=PAC:16426484.CDS.5;Parent=PAC:16426484;pacid=16426484
						supercontig_8	phytozomev11	CDS	1399721	1399786	.	-	0	ID=PAC:16426484.CDS.6;Parent=PAC:16426484;pacid=16426484
						supercontig_8	phytozomev11	CDS	1398578	1398964	.	-	0	ID=PAC:16426484.CDS.7;Parent=PAC:16426484;pacid=16426484
						supercontig_8	phytozomev11	CDS	1398240	1398314	.	-	1	ID=PAC:16426484.CDS.8;Parent=PAC:16426484;pacid=16426484
						supercontig_8	phytozomev11	CDS	1397558	1397656	.	-	0	ID=PAC:16426484.CDS.9;Parent=PAC:16426484;pacid=16426484
						supercontig_57	phytozomev11	gene	457130	459334	.	+	.	ID=evm.TU.supercontig_57.28;Name=evm.TU.supercontig_57.28
						supercontig_57	phytozomev11	mRNA	457130	459334	.	+	.	ID=PAC:16422848;Name=evm.model.supercontig_57.28;pacid=16422848;longest=1;Parent=evm.TU.supercontig_57.28
						supercontig_57	phytozomev11	CDS	457130	457137	.	+	1	ID=PAC:16422848.CDS.1;Parent=PAC:16422848;pacid=16422848
						supercontig_57	phytozomev11	CDS	457467	458400	.	+	1	ID=PAC:16422848.CDS.2;Parent=PAC:16422848;pacid=16422848
						supercontig_57	phytozomev11	CDS	458480	458587	.	+	1	ID=PAC:16422848.CDS.3;Parent=PAC:16422848;pacid=16422848
						supercontig_57	phytozomev11	CDS	458687	458752	.	+	1	ID=PAC:16422848.CDS.4;Parent=PAC:16422848;pacid=16422848
						supercontig_57	phytozomev11	CDS	458846	458911	.	+	1	ID=PAC:16422848.CDS.5;Parent=PAC:16422848;pacid=16422848
						supercontig_57	phytozomev11	CDS	459026	459334	.	+	1	ID=PAC:16422848.CDS.6;Parent=PAC:16422848;pacid=16422848
						supercontig_65	phytozomev11	gene	669184	671335	.	+	.	ID=evm.TU.supercontig_65.63;Name=evm.TU.supercontig_65.63
						supercontig_65	phytozomev11	mRNA	669184	671335	.	+	.	ID=PAC:16424474;Name=evm.model.supercontig_65.63;pacid=16424474;longest=1;Parent=evm.TU.supercontig_65.63
						supercontig_65	phytozomev11	CDS	669184	669525	.	+	0	ID=PAC:16424474.CDS.1;Parent=PAC:16424474;pacid=16424474
						supercontig_65	phytozomev11	CDS	669658	669750	.	+	0	ID=PAC:16424474.CDS.2;Parent=PAC:16424474;pacid=16424474
						supercontig_65	phytozomev11	CDS	669851	669916	.	+	1	ID=PAC:16424474.CDS.3;Parent=PAC:16424474;pacid=16424474
						supercontig_65	phytozomev11	CDS	670687	670752	.	+	1	ID=PAC:16424474.CDS.4;Parent=PAC:16424474;pacid=16424474
						supercontig_65	phytozomev11	CDS	670922	671335	.	+	1	ID=PAC:16424474.CDS.5;Parent=PAC:16424474;pacid=16424474
						supercontig_212	phytozomev11	gene	159106	161202	.	-	.	ID=evm.TU.supercontig_212.3;Name=evm.TU.supercontig_212.3
						supercontig_212	phytozomev11	mRNA	159106	161202	.	-	.	ID=PAC:16413684;Name=evm.model.supercontig_212.3;pacid=16413684;longest=1;Parent=evm.TU.supercontig_212.3
						supercontig_212	phytozomev11	CDS	161062	161202	.	-	0	ID=PAC:16413684.CDS.1;Parent=PAC:16413684;pacid=16413684
						supercontig_212	phytozomev11	CDS	160703	160768	.	-	1	ID=PAC:16413684.CDS.2;Parent=PAC:16413684;pacid=16413684
						supercontig_212	phytozomev11	CDS	159257	159580	.	-	1	ID=PAC:16413684.CDS.3;Parent=PAC:16413684;pacid=16413684
						supercontig_212	phytozomev11	CDS	159106	159192	.	-	1	ID=PAC:16413684.CDS.4;Parent=PAC:16413684;pacid=16413684
						supercontig_1213	phytozomev11	gene	13195	15576	.	-	.	ID=evm.TU.supercontig_1213.3;Name=evm.TU.supercontig_1213.3
						supercontig_1213	phytozomev11	mRNA	13195	15576	.	-	.	ID=PAC:16407048;Name=evm.model.supercontig_1213.3;pacid=16407048;longest=1;Parent=evm.TU.supercontig_1213.3
						supercontig_1213	phytozomev11	CDS	15121	15576	.	-	0	ID=PAC:16407048.CDS.1;Parent=PAC:16407048;pacid=16407048
						supercontig_1213	phytozomev11	CDS	14233	14334	.	-	0	ID=PAC:16407048.CDS.2;Parent=PAC:16407048;pacid=16407048
						supercontig_1213	phytozomev11	CDS	13966	14031	.	-	0	ID=PAC:16407048.CDS.3;Parent=PAC:16407048;pacid=16407048
						supercontig_1213	phytozomev11	CDS	13415	13846	.	-	0	ID=PAC:16407048.CDS.4;Parent=PAC:16407048;pacid=16407048
						supercontig_1213	phytozomev11	CDS	13195	13314	.	-	0	ID=PAC:16407048.CDS.5;Parent=PAC:16407048;pacid=16407048
						supercontig_82	phytozomev11	gene	970179	973882	.	-	.	ID=evm.TU.supercontig_82.59;Name=evm.TU.supercontig_82.59
						supercontig_82	phytozomev11	mRNA	970179	973882	.	-	.	ID=PAC:16427096;Name=evm.model.supercontig_82.59;pacid=16427096;longest=1;Parent=evm.TU.supercontig_82.59
						supercontig_82	phytozomev11	CDS	973136	973882	.	-	0	ID=PAC:16427096.CDS.1;Parent=PAC:16427096;pacid=16427096
						supercontig_82	phytozomev11	CDS	972694	972786	.	-	1	ID=PAC:16427096.CDS.2;Parent=PAC:16427096;pacid=16427096
						supercontig_82	phytozomev11	CDS	972459	972560	.	-	0	ID=PAC:16427096.CDS.3;Parent=PAC:16427096;pacid=16427096
						supercontig_82	phytozomev11	CDS	972267	972332	.	-	0	ID=PAC:16427096.CDS.4;Parent=PAC:16427096;pacid=16427096
						supercontig_82	phytozomev11	CDS	971443	971508	.	-	0	ID=PAC:16427096.CDS.5;Parent=PAC:16427096;pacid=16427096
						supercontig_82	phytozomev11	CDS	971159	971227	.	-	0	ID=PAC:16427096.CDS.6;Parent=PAC:16427096;pacid=16427096
						supercontig_82	phytozomev11	CDS	970179	970628	.	-	1	ID=PAC:16427096.CDS.7;Parent=PAC:16427096;pacid=16427096
						contig_30708	phytozomev11	gene	1759	4682	.	+	.	ID=gevm.TU.contig_30708.1;Name=evm.TU.contig_30708.1
						contig_30708	phytozomev11	mRNA	1759	4682	.	+	.	ID=PAC:16429874;Name=evm.TU.contig_30708.1;pacid=16429874;longest=1;Parent=gevm.TU.contig_30708.1
						contig_30708	phytozomev11	CDS	1759	2250	.	+	1	ID=PAC:16429874.CDS.1;Parent=PAC:16429874;pacid=16429874
						contig_30708	phytozomev11	CDS	2541	2717	.	+	1	ID=PAC:16429874.CDS.2;Parent=PAC:16429874;pacid=16429874
						contig_30708	phytozomev11	CDS	2881	2946	.	+	0	ID=PAC:16429874.CDS.3;Parent=PAC:16429874;pacid=16429874
						contig_30708	phytozomev11	CDS	3572	3637	.	+	0	ID=PAC:16429874.CDS.4;Parent=PAC:16429874;pacid=16429874
						contig_30708	phytozomev11	CDS	3831	3899	.	+	0	ID=PAC:16429874.CDS.5;Parent=PAC:16429874;pacid=16429874
						contig_30708	phytozomev11	CDS	4266	4682	.	+	1	ID=PAC:16429874.CDS.6;Parent=PAC:16429874;pacid=16429874
						supercontig_117	phytozomev11	gene	926083	928328	.	+	.	ID=evm.TU.supercontig_117.94;Name=evm.TU.supercontig_117.94
						supercontig_117	phytozomev11	mRNA	926083	928328	.	+	.	ID=PAC:16406456;Name=evm.model.supercontig_117.94;pacid=16406456;longest=1;Parent=evm.TU.supercontig_117.94
						supercontig_117	phytozomev11	CDS	926083	926175	.	+	0	ID=PAC:16406456.CDS.1;Parent=PAC:16406456;pacid=16406456
						supercontig_117	phytozomev11	CDS	927284	927403	.	+	1	ID=PAC:16406456.CDS.2;Parent=PAC:16406456;pacid=16406456
						supercontig_117	phytozomev11	CDS	927939	928004	.	+	1	ID=PAC:16406456.CDS.3;Parent=PAC:16406456;pacid=16406456
						supercontig_117	phytozomev11	CDS	928263	928328	.	+	1	ID=PAC:16406456.CDS.4;Parent=PAC:16406456;pacid=16406456
						supercontig_52	phytozomev11	gene	835928	840930	.	-	.	ID=evm.TU.supercontig_52.97;Name=evm.TU.supercontig_52.97
						supercontig_52	phytozomev11	mRNA	835928	840930	.	-	.	ID=PAC:16422125;Name=evm.model.supercontig_52.97;pacid=16422125;longest=1;Parent=evm.TU.supercontig_52.97
						supercontig_52	phytozomev11	CDS	840565	840930	.	-	0	ID=PAC:16422125.CDS.1;Parent=PAC:16422125;pacid=16422125
						supercontig_52	phytozomev11	CDS	839292	839411	.	-	0	ID=PAC:16422125.CDS.2;Parent=PAC:16422125;pacid=16422125
						supercontig_52	phytozomev11	CDS	838612	838677	.	-	0	ID=PAC:16422125.CDS.3;Parent=PAC:16422125;pacid=16422125
						supercontig_52	phytozomev11	CDS	837124	837189	.	-	0	ID=PAC:16422125.CDS.4;Parent=PAC:16422125;pacid=16422125
						supercontig_52	phytozomev11	CDS	835928	836314	.	-	0	ID=PAC:16422125.CDS.5;Parent=PAC:16422125;pacid=16422125
						contig_45766	phytozomev11	gene	195	989	.	+	.	ID=evm.TU.contig_45766;Name=evm.TU.contig_45766
						contig_45766	phytozomev11	mRNA	195	989	.	+	.	ID=PAC:16432219;Name=evm.TU.contig_45766.1;pacid=16432219;longest=1;Parent=evm.TU.contig_45766
						contig_45766	phytozomev11	CDS	195	296	.	+	1	ID=PAC:16432219.CDS.1;Parent=PAC:16432219;pacid=16432219
						contig_45766	phytozomev11	CDS	426	491	.	+	1	ID=PAC:16432219.CDS.2;Parent=PAC:16432219;pacid=16432219
						contig_45766	phytozomev11	CDS	749	817	.	+	1	ID=PAC:16432219.CDS.3;Parent=PAC:16432219;pacid=16432219
						contig_45766	phytozomev11	CDS	924	989	.	+	0	ID=PAC:16432219.CDS.4;Parent=PAC:16432219;pacid=16432219
						supercontig_85	phytozomev11	gene	734998	737099	.	-	.	ID=evm.TU.supercontig_85.115;Name=evm.TU.supercontig_85.115
						supercontig_85	phytozomev11	mRNA	734998	737099	.	-	.	ID=PAC:16427425;Name=evm.model.supercontig_85.115;pacid=16427425;longest=1;Parent=evm.TU.supercontig_85.115
						supercontig_85	phytozomev11	CDS	736976	737099	.	-	0	ID=PAC:16427425.CDS.1;Parent=PAC:16427425;pacid=16427425
						supercontig_85	phytozomev11	CDS	735833	736167	.	-	0	ID=PAC:16427425.CDS.2;Parent=PAC:16427425;pacid=16427425
						supercontig_85	phytozomev11	CDS	735579	735746	.	-	1	ID=PAC:16427425.CDS.3;Parent=PAC:16427425;pacid=16427425
						supercontig_85	phytozomev11	CDS	735312	735377	.	-	1	ID=PAC:16427425.CDS.4;Parent=PAC:16427425;pacid=16427425
						supercontig_85	phytozomev11	CDS	735159	735227	.	-	1	ID=PAC:16427425.CDS.5;Parent=PAC:16427425;pacid=16427425
						supercontig_85	phytozomev11	CDS	734998	735069	.	-	0	ID=PAC:16427425.CDS.6;Parent=PAC:16427425;pacid=16427425
						supercontig_84	phytozomev11	gene	681176	683169	.	+	.	ID=evm.TU.supercontig_84.89;Name=evm.TU.supercontig_84.89
						supercontig_84	phytozomev11	mRNA	681176	683169	.	+	.	ID=PAC:16427375;Name=evm.model.supercontig_84.89;pacid=16427375;longest=1;Parent=evm.TU.supercontig_84.89
						supercontig_84	phytozomev11	CDS	681176	681764	.	+	1	ID=PAC:16427375.CDS.1;Parent=PAC:16427375;pacid=16427375
						supercontig_84	phytozomev11	CDS	681997	682256	.	+	0	ID=PAC:16427375.CDS.2;Parent=PAC:16427375;pacid=16427375
						supercontig_84	phytozomev11	CDS	682342	682509	.	+	0	ID=PAC:16427375.CDS.3;Parent=PAC:16427375;pacid=16427375
						supercontig_84	phytozomev11	CDS	682724	682789	.	+	0	ID=PAC:16427375.CDS.4;Parent=PAC:16427375;pacid=16427375
						supercontig_84	phytozomev11	CDS	682900	682968	.	+	0	ID=PAC:16427375.CDS.5;Parent=PAC:16427375;pacid=16427375
						supercontig_84	phytozomev11	CDS	683113	683169	.	+	1	ID=PAC:16427375.CDS.6;Parent=PAC:16427375;pacid=16427375
						supercontig_65	phytozomev11	gene	525133	526565	.	-	.	ID=evm.TU.supercontig_65.44;Name=evm.TU.supercontig_65.44
						supercontig_65	phytozomev11	mRNA	525133	526565	.	-	.	ID=PAC:16424453;Name=evm.model.supercontig_65.44;pacid=16424453;longest=1;Parent=evm.TU.supercontig_65.44
						supercontig_65	phytozomev11	CDS	526379	526565	.	-	0	ID=PAC:16424453.CDS.1;Parent=PAC:16424453;pacid=16424453
						supercontig_65	phytozomev11	CDS	526125	526252	.	-	1	ID=PAC:16424453.CDS.2;Parent=PAC:16424453;pacid=16424453
						supercontig_65	phytozomev11	CDS	525901	526023	.	-	1	ID=PAC:16424453.CDS.3;Parent=PAC:16424453;pacid=16424453
						supercontig_65	phytozomev11	CDS	525738	525803	.	-	0	ID=PAC:16424453.CDS.4;Parent=PAC:16424453;pacid=16424453
						supercontig_65	phytozomev11	CDS	525572	525640	.	-	0	ID=PAC:16424453.CDS.5;Parent=PAC:16424453;pacid=16424453
						supercontig_65	phytozomev11	CDS	525379	525462	.	-	1	ID=PAC:16424453.CDS.6;Parent=PAC:16424453;pacid=16424453
						supercontig_65	phytozomev11	CDS	525133	525234	.	-	1	ID=PAC:16424453.CDS.7;Parent=PAC:16424453;pacid=16424453
						supercontig_3	phytozomev11	gene	3588619	3590081	.	+	.	ID=evm.TU.supercontig_3.503;Name=evm.TU.supercontig_3.503
						supercontig_3	phytozomev11	mRNA	3588619	3590081	.	+	.	ID=PAC:16416817;Name=evm.model.supercontig_3.503;pacid=16416817;longest=1;Parent=evm.TU.supercontig_3.503
						supercontig_3	phytozomev11	CDS	3588619	3589044	.	+	1	ID=PAC:16416817.CDS.1;Parent=PAC:16416817;pacid=16416817
						supercontig_3	phytozomev11	CDS	3589158	3589271	.	+	1	ID=PAC:16416817.CDS.2;Parent=PAC:16416817;pacid=16416817
						supercontig_3	phytozomev11	CDS	3589437	3589502	.	+	1	ID=PAC:16416817.CDS.3;Parent=PAC:16416817;pacid=16416817
						supercontig_3	phytozomev11	CDS	3589588	3589656	.	+	1	ID=PAC:16416817.CDS.4;Parent=PAC:16416817;pacid=16416817
						supercontig_3	phytozomev11	CDS	3589776	3589853	.	+	0	ID=PAC:16416817.CDS.5;Parent=PAC:16416817;pacid=16416817
						supercontig_3	phytozomev11	CDS	3589986	3590081	.	+	0	ID=PAC:16416817.CDS.6;Parent=PAC:16416817;pacid=16416817
						supercontig_282	phytozomev11	gene	22413	23845	.	+	.	ID=evm.TU.supercontig_282.7;Name=evm.TU.supercontig_282.7
						supercontig_282	phytozomev11	mRNA	22413	23845	.	+	.	ID=PAC:16416034;Name=evm.model.supercontig_282.7;pacid=16416034;longest=1;Parent=evm.TU.supercontig_282.7
						supercontig_282	phytozomev11	CDS	22413	22751	.	+	1	ID=PAC:16416034.CDS.1;Parent=PAC:16416034;pacid=16416034
						supercontig_282	phytozomev11	CDS	22857	22976	.	+	0	ID=PAC:16416034.CDS.2;Parent=PAC:16416034;pacid=16416034
						supercontig_282	phytozomev11	CDS	23103	23168	.	+	0	ID=PAC:16416034.CDS.3;Parent=PAC:16416034;pacid=16416034
						supercontig_282	phytozomev11	CDS	23327	23395	.	+	0	ID=PAC:16416034.CDS.4;Parent=PAC:16416034;pacid=16416034
						supercontig_282	phytozomev11	CDS	23502	23579	.	+	1	ID=PAC:16416034.CDS.5;Parent=PAC:16416034;pacid=16416034
						supercontig_282	phytozomev11	CDS	23753	23845	.	+	1	ID=PAC:16416034.CDS.6;Parent=PAC:16416034;pacid=16416034
						supercontig_203	phytozomev11	gene	180142	183255	.	+	.	ID=evm.TU.supercontig_203.5;Name=evm.TU.supercontig_203.5
						supercontig_203	phytozomev11	mRNA	180142	183255	.	+	.	ID=PAC:16413213;Name=evm.model.supercontig_203.5;pacid=16413213;longest=1;Parent=evm.TU.supercontig_203.5
						supercontig_203	phytozomev11	CDS	180142	180267	.	+	0	ID=PAC:16413213.CDS.1;Parent=PAC:16413213;pacid=16413213
						supercontig_203	phytozomev11	CDS	180644	180874	.	+	0	ID=PAC:16413213.CDS.2;Parent=PAC:16413213;pacid=16413213
						supercontig_203	phytozomev11	CDS	181110	181175	.	+	1	ID=PAC:16413213.CDS.3;Parent=PAC:16413213;pacid=16413213
						supercontig_203	phytozomev11	CDS	181444	181512	.	+	1	ID=PAC:16413213.CDS.4;Parent=PAC:16413213;pacid=16413213
						supercontig_203	phytozomev11	CDS	181615	181692	.	+	0	ID=PAC:16413213.CDS.5;Parent=PAC:16413213;pacid=16413213
						supercontig_203	phytozomev11	CDS	183127	183255	.	+	0	ID=PAC:16413213.CDS.6;Parent=PAC:16413213;pacid=16413213
						supercontig_5	phytozomev11	gene	2747677	2750174	.	+	.	ID=evm.TU.supercontig_5.303;Name=evm.TU.supercontig_5.303
						supercontig_5	phytozomev11	mRNA	2747677	2750174	.	+	.	ID=PAC:16421422;Name=evm.model.supercontig_5.303;pacid=16421422;longest=1;Parent=evm.TU.supercontig_5.303
						supercontig_5	phytozomev11	CDS	2747677	2747976	.	+	1	ID=PAC:16421422.CDS.1;Parent=PAC:16421422;pacid=16421422
						supercontig_5	phytozomev11	CDS	2748387	2748578	.	+	1	ID=PAC:16421422.CDS.2;Parent=PAC:16421422;pacid=16421422
						supercontig_5	phytozomev11	CDS	2748797	2748862	.	+	1	ID=PAC:16421422.CDS.3;Parent=PAC:16421422;pacid=16421422
						supercontig_5	phytozomev11	CDS	2749025	2749093	.	+	1	ID=PAC:16421422.CDS.4;Parent=PAC:16421422;pacid=16421422
						supercontig_5	phytozomev11	CDS	2749204	2749257	.	+	0	ID=PAC:16421422.CDS.5;Parent=PAC:16421422;pacid=16421422
						supercontig_5	phytozomev11	CDS	2750043	2750174	.	+	0	ID=PAC:16421422.CDS.6;Parent=PAC:16421422;pacid=16421422
						supercontig_85	phytozomev11	gene	789191	794239	.	+	.	ID=evm.TU.supercontig_85.120;Name=evm.TU.supercontig_85.120
						supercontig_85	phytozomev11	mRNA	789191	794239	.	+	.	ID=PAC:16427431;Name=evm.model.supercontig_85.120;pacid=16427431;longest=1;Parent=evm.TU.supercontig_85.120
						supercontig_85	phytozomev11	CDS	789191	789715	.	+	1	ID=PAC:16427431.CDS.1;Parent=PAC:16427431;pacid=16427431
						supercontig_85	phytozomev11	CDS	789827	789955	.	+	0	ID=PAC:16427431.CDS.2;Parent=PAC:16427431;pacid=16427431
						supercontig_85	phytozomev11	CDS	790060	790125	.	+	1	ID=PAC:16427431.CDS.3;Parent=PAC:16427431;pacid=16427431
						supercontig_85	phytozomev11	CDS	791694	791762	.	+	1	ID=PAC:16427431.CDS.4;Parent=PAC:16427431;pacid=16427431
						supercontig_85	phytozomev11	CDS	792328	792399	.	+	0	ID=PAC:16427431.CDS.5;Parent=PAC:16427431;pacid=16427431
						supercontig_85	phytozomev11	CDS	793376	793589	.	+	0	ID=PAC:16427431.CDS.6;Parent=PAC:16427431;pacid=16427431
						supercontig_85	phytozomev11	CDS	794202	794239	.	+	0	ID=PAC:16427431.CDS.7;Parent=PAC:16427431;pacid=16427431
						supercontig_62	phytozomev11	gene	990791	992775	.	+	.	ID=evm.TU.supercontig_62.160;Name=evm.TU.supercontig_62.160
						supercontig_62	phytozomev11	mRNA	990791	992775	.	+	.	ID=PAC:16423962;Name=evm.model.supercontig_62.160;pacid=16423962;longest=1;Parent=evm.TU.supercontig_62.160
						supercontig_62	phytozomev11	CDS	990791	991327	.	+	1	ID=PAC:16423962.CDS.1;Parent=PAC:16423962;pacid=16423962
						supercontig_62	phytozomev11	CDS	991527	991736	.	+	0	ID=PAC:16423962.CDS.2;Parent=PAC:16423962;pacid=16423962
						supercontig_62	phytozomev11	CDS	991812	991946	.	+	0	ID=PAC:16423962.CDS.3;Parent=PAC:16423962;pacid=16423962
						supercontig_62	phytozomev11	CDS	992024	992095	.	+	1	ID=PAC:16423962.CDS.4;Parent=PAC:16423962;pacid=16423962
						supercontig_62	phytozomev11	CDS	992181	992327	.	+	1	ID=PAC:16423962.CDS.5;Parent=PAC:16423962;pacid=16423962
						supercontig_62	phytozomev11	CDS	992405	992498	.	+	0	ID=PAC:16423962.CDS.6;Parent=PAC:16423962;pacid=16423962
						supercontig_62	phytozomev11	CDS	992738	992775	.	+	0	ID=PAC:16423962.CDS.7;Parent=PAC:16423962;pacid=16423962
						supercontig_6	phytozomev11	gene	1026728	1028824	.	+	.	ID=evm.TU.supercontig_6.130;Name=evm.TU.supercontig_6.130
						supercontig_6	phytozomev11	mRNA	1026728	1028824	.	+	.	ID=PAC:16423299;Name=evm.model.supercontig_6.130;pacid=16423299;longest=1;Parent=evm.TU.supercontig_6.130
						supercontig_6	phytozomev11	CDS	1026728	1027162	.	+	0	ID=PAC:16423299.CDS.1;Parent=PAC:16423299;pacid=16423299
						supercontig_6	phytozomev11	CDS	1027499	1027696	.	+	1	ID=PAC:16423299.CDS.2;Parent=PAC:16423299;pacid=16423299
						supercontig_6	phytozomev11	CDS	1027867	1028001	.	+	1	ID=PAC:16423299.CDS.3;Parent=PAC:16423299;pacid=16423299
						supercontig_6	phytozomev11	CDS	1028122	1028262	.	+	0	ID=PAC:16423299.CDS.4;Parent=PAC:16423299;pacid=16423299
						supercontig_6	phytozomev11	CDS	1028487	1028508	.	+	1	ID=PAC:16423299.CDS.5;Parent=PAC:16423299;pacid=16423299
						supercontig_6	phytozomev11	CDS	1028745	1028824	.	+	1	ID=PAC:16423299.CDS.6;Parent=PAC:16423299;pacid=16423299
						supercontig_160	phytozomev11	gene	582084	584295	.	-	.	ID=evm.TU.supercontig_160.32;Name=evm.TU.supercontig_160.32
						supercontig_160	phytozomev11	mRNA	582084	584295	.	-	.	ID=PAC:16410164;Name=evm.model.supercontig_160.32;pacid=16410164;longest=1;Parent=evm.TU.supercontig_160.32
						supercontig_160	phytozomev11	CDS	583723	584295	.	-	0	ID=PAC:16410164.CDS.1;Parent=PAC:16410164;pacid=16410164
						supercontig_160	phytozomev11	CDS	583381	583614	.	-	1	ID=PAC:16410164.CDS.2;Parent=PAC:16410164;pacid=16410164
						supercontig_160	phytozomev11	CDS	583238	583303	.	-	1	ID=PAC:16410164.CDS.3;Parent=PAC:16410164;pacid=16410164
						supercontig_160	phytozomev11	CDS	583075	583143	.	-	1	ID=PAC:16410164.CDS.4;Parent=PAC:16410164;pacid=16410164
						supercontig_160	phytozomev11	CDS	582661	582732	.	-	0	ID=PAC:16410164.CDS.5;Parent=PAC:16410164;pacid=16410164
						supercontig_160	phytozomev11	CDS	582216	582359	.	-	0	ID=PAC:16410164.CDS.6;Parent=PAC:16410164;pacid=16410164
						supercontig_160	phytozomev11	CDS	582084	582131	.	-	0	ID=PAC:16410164.CDS.7;Parent=PAC:16410164;pacid=16410164
						supercontig_4	phytozomev11	gene	2257282	2259041	.	+	.	ID=evm.TU.supercontig_4.112;Name=evm.TU.supercontig_4.112
						supercontig_4	phytozomev11	mRNA	2257282	2259041	.	+	.	ID=PAC:16419189;Name=evm.model.supercontig_4.112;pacid=16419189;longest=1;Parent=evm.TU.supercontig_4.112
						supercontig_4	phytozomev11	CDS	2257282	2257668	.	+	0	ID=PAC:16419189.CDS.1;Parent=PAC:16419189;pacid=16419189
						supercontig_4	phytozomev11	CDS	2257776	2257991	.	+	1	ID=PAC:16419189.CDS.2;Parent=PAC:16419189;pacid=16419189
						supercontig_4	phytozomev11	CDS	2258082	2258147	.	+	1	ID=PAC:16419189.CDS.3;Parent=PAC:16419189;pacid=16419189
						supercontig_4	phytozomev11	CDS	2258338	2258406	.	+	1	ID=PAC:16419189.CDS.4;Parent=PAC:16419189;pacid=16419189
						supercontig_4	phytozomev11	CDS	2258489	2258572	.	+	0	ID=PAC:16419189.CDS.5;Parent=PAC:16419189;pacid=16419189
						supercontig_4	phytozomev11	CDS	2258672	2258827	.	+	0	ID=PAC:16419189.CDS.6;Parent=PAC:16419189;pacid=16419189
						supercontig_4	phytozomev11	CDS	2258937	2259041	.	+	0	ID=PAC:16419189.CDS.7;Parent=PAC:16419189;pacid=16419189
						supercontig_8	phytozomev11	gene	678507	680920	.	+	.	ID=evm.TU.supercontig_8.103;Name=evm.TU.supercontig_8.103
						supercontig_8	phytozomev11	mRNA	678507	680920	.	+	.	ID=PAC:16426379;Name=evm.model.supercontig_8.103;pacid=16426379;longest=1;Parent=evm.TU.supercontig_8.103
						supercontig_8	phytozomev11	CDS	678507	679385	.	+	0	ID=PAC:16426379.CDS.1;Parent=PAC:16426379;pacid=16426379
						supercontig_8	phytozomev11	CDS	679511	679741	.	+	1	ID=PAC:16426379.CDS.2;Parent=PAC:16426379;pacid=16426379
						supercontig_8	phytozomev11	CDS	679847	679912	.	+	0	ID=PAC:16426379.CDS.3;Parent=PAC:16426379;pacid=16426379
						supercontig_8	phytozomev11	CDS	680011	680079	.	+	0	ID=PAC:16426379.CDS.4;Parent=PAC:16426379;pacid=16426379
						supercontig_8	phytozomev11	CDS	680210	680281	.	+	1	ID=PAC:16426379.CDS.5;Parent=PAC:16426379;pacid=16426379
						supercontig_8	phytozomev11	CDS	680383	680607	.	+	1	ID=PAC:16426379.CDS.6;Parent=PAC:16426379;pacid=16426379
						supercontig_8	phytozomev11	CDS	680702	680801	.	+	0	ID=PAC:16426379.CDS.7;Parent=PAC:16426379;pacid=16426379
						supercontig_8	phytozomev11	CDS	680883	680920	.	+	0	ID=PAC:16426379.CDS.8;Parent=PAC:16426379;pacid=16426379
						supercontig_157	phytozomev11	gene	105884	108174	.	+	.	ID=evm.TU.supercontig_157.5;Name=evm.TU.supercontig_157.5
						supercontig_157	phytozomev11	mRNA	105884	108174	.	+	.	ID=PAC:16409838;Name=evm.model.supercontig_157.5;pacid=16409838;longest=1;Parent=evm.TU.supercontig_157.5
						supercontig_157	phytozomev11	CDS	105884	106819	.	+	1	ID=PAC:16409838.CDS.1;Parent=PAC:16409838;pacid=16409838
						supercontig_157	phytozomev11	CDS	106907	107122	.	+	1	ID=PAC:16409838.CDS.2;Parent=PAC:16409838;pacid=16409838
						supercontig_157	phytozomev11	CDS	107206	107271	.	+	1	ID=PAC:16409838.CDS.3;Parent=PAC:16409838;pacid=16409838
						supercontig_157	phytozomev11	CDS	107361	107429	.	+	1	ID=PAC:16409838.CDS.4;Parent=PAC:16409838;pacid=16409838
						supercontig_157	phytozomev11	CDS	107509	107580	.	+	0	ID=PAC:16409838.CDS.5;Parent=PAC:16409838;pacid=16409838
						supercontig_157	phytozomev11	CDS	107665	107880	.	+	0	ID=PAC:16409838.CDS.6;Parent=PAC:16409838;pacid=16409838
						supercontig_157	phytozomev11	CDS	107970	108048	.	+	0	ID=PAC:16409838.CDS.7;Parent=PAC:16409838;pacid=16409838
						supercontig_157	phytozomev11	CDS	108137	108174	.	+	1	ID=PAC:16409838.CDS.8;Parent=PAC:16409838;pacid=16409838
						supercontig_1	phytozomev11	gene	2657534	2660343	.	-	.	ID=evm.TU.supercontig_1.175;Name=evm.TU.supercontig_1.175
						supercontig_1	phytozomev11	mRNA	2657534	2660343	.	-	.	ID=PAC:16404094;Name=evm.model.supercontig_1.175;pacid=16404094;longest=1;Parent=evm.TU.supercontig_1.175
						supercontig_1	phytozomev11	CDS	2659423	2660343	.	-	0	ID=PAC:16404094.CDS.1;Parent=PAC:16404094;pacid=16404094
						supercontig_1	phytozomev11	CDS	2659101	2659355	.	-	1	ID=PAC:16404094.CDS.2;Parent=PAC:16404094;pacid=16404094
						supercontig_1	phytozomev11	CDS	2658947	2659012	.	-	0	ID=PAC:16404094.CDS.3;Parent=PAC:16404094;pacid=16404094
						supercontig_1	phytozomev11	CDS	2658790	2658858	.	-	0	ID=PAC:16404094.CDS.4;Parent=PAC:16404094;pacid=16404094
						supercontig_1	phytozomev11	CDS	2658385	2658456	.	-	1	ID=PAC:16404094.CDS.5;Parent=PAC:16404094;pacid=16404094
						supercontig_1	phytozomev11	CDS	2658066	2658278	.	-	1	ID=PAC:16404094.CDS.6;Parent=PAC:16404094;pacid=16404094
						supercontig_1	phytozomev11	CDS	2657662	2657749	.	-	0	ID=PAC:16404094.CDS.7;Parent=PAC:16404094;pacid=16404094
						supercontig_1	phytozomev11	CDS	2657534	2657571	.	-	0	ID=PAC:16404094.CDS.8;Parent=PAC:16404094;pacid=16404094
						supercontig_50	phytozomev11	gene	447812	451390	.	+	.	ID=evm.TU.supercontig_50.37;Name=evm.TU.supercontig_50.37
						supercontig_50	phytozomev11	mRNA	447812	451390	.	+	.	ID=PAC:16421657;Name=evm.model.supercontig_50.37;pacid=16421657;longest=1;Parent=evm.TU.supercontig_50.37
						supercontig_50	phytozomev11	CDS	447812	447922	.	+	0	ID=PAC:16421657.CDS.1;Parent=PAC:16421657;pacid=16421657
						supercontig_50	phytozomev11	CDS	448262	448321	.	+	1	ID=PAC:16421657.CDS.2;Parent=PAC:16421657;pacid=16421657
						supercontig_50	phytozomev11	CDS	448883	449002	.	+	1	ID=PAC:16421657.CDS.3;Parent=PAC:16421657;pacid=16421657
						supercontig_50	phytozomev11	CDS	449138	450259	.	+	1	ID=PAC:16421657.CDS.4;Parent=PAC:16421657;pacid=16421657
						supercontig_50	phytozomev11	CDS	450344	450445	.	+	1	ID=PAC:16421657.CDS.5;Parent=PAC:16421657;pacid=16421657
						supercontig_50	phytozomev11	CDS	450748	450879	.	+	1	ID=PAC:16421657.CDS.6;Parent=PAC:16421657;pacid=16421657
						supercontig_50	phytozomev11	CDS	451241	451390	.	+	1	ID=PAC:16421657.CDS.7;Parent=PAC:16421657;pacid=16421657
						supercontig_175	phytozomev11	gene	162780	167436	.	+	.	ID=evm.TU.supercontig_175.4;Name=evm.TU.supercontig_175.4
						supercontig_175	phytozomev11	mRNA	162780	167436	.	+	.	ID=PAC:16411058;Name=evm.model.supercontig_175.4;pacid=16411058;longest=1;Parent=evm.TU.supercontig_175.4
						supercontig_175	phytozomev11	CDS	162780	162847	.	+	0	ID=PAC:16411058.CDS.1;Parent=PAC:16411058;pacid=16411058
						supercontig_175	phytozomev11	CDS	163517	163606	.	+	0	ID=PAC:16411058.CDS.2;Parent=PAC:16411058;pacid=16411058
						supercontig_175	phytozomev11	CDS	163723	163831	.	+	0	ID=PAC:16411058.CDS.3;Parent=PAC:16411058;pacid=16411058
						supercontig_175	phytozomev11	CDS	163974	164021	.	+	1	ID=PAC:16411058.CDS.4;Parent=PAC:16411058;pacid=16411058
						supercontig_175	phytozomev11	CDS	164214	164273	.	+	1	ID=PAC:16411058.CDS.5;Parent=PAC:16411058;pacid=16411058
						supercontig_175	phytozomev11	CDS	164490	164522	.	+	1	ID=PAC:16411058.CDS.6;Parent=PAC:16411058;pacid=16411058
						supercontig_175	phytozomev11	CDS	164723	166321	.	+	0	ID=PAC:16411058.CDS.7;Parent=PAC:16411058;pacid=16411058
						supercontig_175	phytozomev11	CDS	166567	166668	.	+	1	ID=PAC:16411058.CDS.8;Parent=PAC:16411058;pacid=16411058
						supercontig_175	phytozomev11	CDS	166770	166940	.	+	1	ID=PAC:16411058.CDS.9;Parent=PAC:16411058;pacid=16411058
						supercontig_175	phytozomev11	CDS	167034	167159	.	+	0	ID=PAC:16411058.CDS.10;Parent=PAC:16411058;pacid=16411058
						supercontig_175	phytozomev11	CDS	167245	167436	.	+	0	ID=PAC:16411058.CDS.11;Parent=PAC:16411058;pacid=16411058
						supercontig_52	phytozomev11	gene	63645	66032	.	-	.	ID=evm.TU.supercontig_52.7;Name=evm.TU.supercontig_52.7
						supercontig_52	phytozomev11	mRNA	63645	66032	.	-	.	ID=PAC:16422095;Name=evm.model.supercontig_52.7;pacid=16422095;longest=1;Parent=evm.TU.supercontig_52.7
						supercontig_52	phytozomev11	CDS	65586	66032	.	-	1	ID=PAC:16422095.CDS.1;Parent=PAC:16422095;pacid=16422095
						supercontig_52	phytozomev11	CDS	65392	65454	.	-	0	ID=PAC:16422095.CDS.2;Parent=PAC:16422095;pacid=16422095
						supercontig_52	phytozomev11	CDS	65130	65273	.	-	1	ID=PAC:16422095.CDS.3;Parent=PAC:16422095;pacid=16422095
						supercontig_52	phytozomev11	CDS	64878	64940	.	-	1	ID=PAC:16422095.CDS.4;Parent=PAC:16422095;pacid=16422095
						supercontig_52	phytozomev11	CDS	64339	64404	.	-	0	ID=PAC:16422095.CDS.5;Parent=PAC:16422095;pacid=16422095
						supercontig_52	phytozomev11	CDS	63645	63812	.	-	0	ID=PAC:16422095.CDS.6;Parent=PAC:16422095;pacid=16422095
						supercontig_3	phytozomev11	gene	1605019	1611058	.	+	.	ID=evm.TU.supercontig_3.225;Name=evm.TU.supercontig_3.225
						supercontig_3	phytozomev11	mRNA	1605019	1611058	.	+	.	ID=PAC:16416508;Name=evm.model.supercontig_3.225;pacid=16416508;longest=1;Parent=evm.TU.supercontig_3.225
						supercontig_3	phytozomev11	CDS	1605019	1605055	.	+	0	ID=PAC:16416508.CDS.1;Parent=PAC:16416508;pacid=16416508
						supercontig_3	phytozomev11	CDS	1605212	1605289	.	+	1	ID=PAC:16416508.CDS.2;Parent=PAC:16416508;pacid=16416508
						supercontig_3	phytozomev11	CDS	1606664	1607041	.	+	1	ID=PAC:16416508.CDS.3;Parent=PAC:16416508;pacid=16416508
						supercontig_3	phytozomev11	CDS	1607871	1607970	.	+	1	ID=PAC:16416508.CDS.4;Parent=PAC:16416508;pacid=16416508
						supercontig_3	phytozomev11	CDS	1608060	1608187	.	+	1	ID=PAC:16416508.CDS.5;Parent=PAC:16416508;pacid=16416508
						supercontig_3	phytozomev11	CDS	1608489	1608600	.	+	1	ID=PAC:16416508.CDS.6;Parent=PAC:16416508;pacid=16416508
						supercontig_3	phytozomev11	CDS	1608789	1608858	.	+	1	ID=PAC:16416508.CDS.7;Parent=PAC:16416508;pacid=16416508
						supercontig_3	phytozomev11	CDS	1608954	1609049	.	+	1	ID=PAC:16416508.CDS.8;Parent=PAC:16416508;pacid=16416508
						supercontig_3	phytozomev11	CDS	1609155	1609609	.	+	1	ID=PAC:16416508.CDS.9;Parent=PAC:16416508;pacid=16416508
						supercontig_3	phytozomev11	CDS	1610274	1610403	.	+	0	ID=PAC:16416508.CDS.10;Parent=PAC:16416508;pacid=16416508
						supercontig_3	phytozomev11	CDS	1610954	1611058	.	+	0	ID=PAC:16416508.CDS.11;Parent=PAC:16416508;pacid=16416508
						supercontig_289	phytozomev11	gene	33240	42220	.	-	.	ID=evm.TU.supercontig_289.6;Name=evm.TU.supercontig_289.6
						supercontig_289	phytozomev11	mRNA	33240	42220	.	-	.	ID=PAC:16416117;Name=evm.model.supercontig_289.6;pacid=16416117;longest=1;Parent=evm.TU.supercontig_289.6
						supercontig_289	phytozomev11	CDS	42091	42220	.	-	0	ID=PAC:16416117.CDS.1;Parent=PAC:16416117;pacid=16416117
						supercontig_289	phytozomev11	CDS	41808	41892	.	-	0	ID=PAC:16416117.CDS.2;Parent=PAC:16416117;pacid=16416117
						supercontig_289	phytozomev11	CDS	40815	40884	.	-	1	ID=PAC:16416117.CDS.3;Parent=PAC:16416117;pacid=16416117
						supercontig_289	phytozomev11	CDS	40622	40717	.	-	1	ID=PAC:16416117.CDS.4;Parent=PAC:16416117;pacid=16416117
						supercontig_289	phytozomev11	CDS	34484	34694	.	-	1	ID=PAC:16416117.CDS.5;Parent=PAC:16416117;pacid=16416117
						supercontig_289	phytozomev11	CDS	34291	34432	.	-	0	ID=PAC:16416117.CDS.6;Parent=PAC:16416117;pacid=16416117
						supercontig_289	phytozomev11	CDS	33891	33981	.	-	0	ID=PAC:16416117.CDS.7;Parent=PAC:16416117;pacid=16416117
						supercontig_289	phytozomev11	CDS	33240	33296	.	-	1	ID=PAC:16416117.CDS.8;Parent=PAC:16416117;pacid=16416117
						supercontig_9	phytozomev11	gene	2551891	2553416	.	+	.	ID=evm.TU.supercontig_9.363;Name=evm.TU.supercontig_9.363
						supercontig_9	phytozomev11	mRNA	2551891	2553416	.	+	.	ID=PAC:16428272;Name=evm.model.supercontig_9.363;pacid=16428272;longest=1;Parent=evm.TU.supercontig_9.363
						supercontig_9	phytozomev11	CDS	2551891	2551989	.	+	1	ID=PAC:16428272.CDS.1;Parent=PAC:16428272;pacid=16428272
						supercontig_9	phytozomev11	CDS	2552337	2552402	.	+	0	ID=PAC:16428272.CDS.2;Parent=PAC:16428272;pacid=16428272
						supercontig_9	phytozomev11	CDS	2552606	2552671	.	+	0	ID=PAC:16428272.CDS.3;Parent=PAC:16428272;pacid=16428272
						supercontig_9	phytozomev11	CDS	2553032	2553079	.	+	0	ID=PAC:16428272.CDS.4;Parent=PAC:16428272;pacid=16428272
						supercontig_9	phytozomev11	CDS	2553261	2553416	.	+	0	ID=PAC:16428272.CDS.5;Parent=PAC:16428272;pacid=16428272
						supercontig_99	phytozomev11	gene	548915	551401	.	+	.	ID=evm.TU.supercontig_99.32;Name=evm.TU.supercontig_99.32
						supercontig_99	phytozomev11	mRNA	548915	551401	.	+	.	ID=PAC:16429274;Name=evm.model.supercontig_99.32;pacid=16429274;longest=1;Parent=evm.TU.supercontig_99.32
						supercontig_99	phytozomev11	CDS	548915	549030	.	+	1	ID=PAC:16429274.CDS.1;Parent=PAC:16429274;pacid=16429274
						supercontig_99	phytozomev11	CDS	549223	549571	.	+	1	ID=PAC:16429274.CDS.2;Parent=PAC:16429274;pacid=16429274
						supercontig_99	phytozomev11	CDS	549931	550065	.	+	0	ID=PAC:16429274.CDS.3;Parent=PAC:16429274;pacid=16429274
						supercontig_99	phytozomev11	CDS	550204	550269	.	+	1	ID=PAC:16429274.CDS.4;Parent=PAC:16429274;pacid=16429274
						supercontig_99	phytozomev11	CDS	550430	550495	.	+	1	ID=PAC:16429274.CDS.5;Parent=PAC:16429274;pacid=16429274
						supercontig_99	phytozomev11	CDS	551106	551168	.	+	1	ID=PAC:16429274.CDS.6;Parent=PAC:16429274;pacid=16429274
						supercontig_99	phytozomev11	CDS	551267	551401	.	+	0	ID=PAC:16429274.CDS.7;Parent=PAC:16429274;pacid=16429274
						supercontig_6	phytozomev11	gene	1406977	1409994	.	-	.	ID=evm.TU.supercontig_6.173;Name=evm.TU.supercontig_6.173
						supercontig_6	phytozomev11	mRNA	1406977	1409994	.	-	.	ID=PAC:16423346;Name=evm.model.supercontig_6.173;pacid=16423346;longest=1;Parent=evm.TU.supercontig_6.173
						supercontig_6	phytozomev11	CDS	1409855	1409994	.	-	0	ID=PAC:16423346.CDS.1;Parent=PAC:16423346;pacid=16423346
						supercontig_6	phytozomev11	CDS	1408508	1409126	.	-	0	ID=PAC:16423346.CDS.2;Parent=PAC:16423346;pacid=16423346
						supercontig_6	phytozomev11	CDS	1407835	1407969	.	-	1	ID=PAC:16423346.CDS.3;Parent=PAC:16423346;pacid=16423346
						supercontig_6	phytozomev11	CDS	1407551	1407616	.	-	0	ID=PAC:16423346.CDS.4;Parent=PAC:16423346;pacid=16423346
						supercontig_6	phytozomev11	CDS	1407378	1407443	.	-	0	ID=PAC:16423346.CDS.5;Parent=PAC:16423346;pacid=16423346
						supercontig_6	phytozomev11	CDS	1407191	1407253	.	-	0	ID=PAC:16423346.CDS.6;Parent=PAC:16423346;pacid=16423346
						supercontig_6	phytozomev11	CDS	1406977	1407099	.	-	1	ID=PAC:16423346.CDS.7;Parent=PAC:16423346;pacid=16423346
						supercontig_12	phytozomev11	gene	2955	5567	.	+	.	ID=evm.TU.supercontig_12.1;Name=evm.TU.supercontig_12.1
						supercontig_12	phytozomev11	mRNA	2955	5567	.	+	.	ID=PAC:16406636;Name=evm.model.supercontig_12.1;pacid=16406636;longest=1;Parent=evm.TU.supercontig_12.1
						supercontig_12	phytozomev11	CDS	2955	3250	.	+	1	ID=PAC:16406636.CDS.1;Parent=PAC:16406636;pacid=16406636
						supercontig_12	phytozomev11	CDS	3351	4008	.	+	1	ID=PAC:16406636.CDS.2;Parent=PAC:16406636;pacid=16406636
						supercontig_12	phytozomev11	CDS	4132	4251	.	+	1	ID=PAC:16406636.CDS.3;Parent=PAC:16406636;pacid=16406636
						supercontig_12	phytozomev11	CDS	4404	4469	.	+	1	ID=PAC:16406636.CDS.4;Parent=PAC:16406636;pacid=16406636
						supercontig_12	phytozomev11	CDS	4669	4734	.	+	1	ID=PAC:16406636.CDS.5;Parent=PAC:16406636;pacid=16406636
						supercontig_12	phytozomev11	CDS	4889	4948	.	+	1	ID=PAC:16406636.CDS.6;Parent=PAC:16406636;pacid=16406636
						supercontig_12	phytozomev11	CDS	5090	5247	.	+	1	ID=PAC:16406636.CDS.7;Parent=PAC:16406636;pacid=16406636
						supercontig_12	phytozomev11	CDS	5423	5567	.	+	1	ID=PAC:16406636.CDS.8;Parent=PAC:16406636;pacid=16406636
						supercontig_27	phytozomev11	gene	1760803	1763445	.	+	.	ID=evm.TU.supercontig_27.162;Name=evm.TU.supercontig_27.162
						supercontig_27	phytozomev11	mRNA	1760803	1763445	.	+	.	ID=PAC:16415537;Name=evm.model.supercontig_27.162;pacid=16415537;longest=1;Parent=evm.TU.supercontig_27.162
						supercontig_27	phytozomev11	CDS	1760803	1761179	.	+	0	ID=PAC:16415537.CDS.1;Parent=PAC:16415537;pacid=16415537
						supercontig_27	phytozomev11	CDS	1761480	1762026	.	+	1	ID=PAC:16415537.CDS.2;Parent=PAC:16415537;pacid=16415537
						supercontig_27	phytozomev11	CDS	1762318	1762431	.	+	0	ID=PAC:16415537.CDS.3;Parent=PAC:16415537;pacid=16415537
						supercontig_27	phytozomev11	CDS	1762636	1762701	.	+	0	ID=PAC:16415537.CDS.4;Parent=PAC:16415537;pacid=16415537
						supercontig_27	phytozomev11	CDS	1762839	1762904	.	+	0	ID=PAC:16415537.CDS.5;Parent=PAC:16415537;pacid=16415537
						supercontig_27	phytozomev11	CDS	1763003	1763056	.	+	0	ID=PAC:16415537.CDS.6;Parent=PAC:16415537;pacid=16415537
						supercontig_27	phytozomev11	CDS	1763290	1763445	.	+	0	ID=PAC:16415537.CDS.7;Parent=PAC:16415537;pacid=16415537
						contig_26556	phytozomev11	gene	5356	8837	.	+	.	ID=gevm.TU.contig_26556.1;Name=evm.TU.contig_26556.1
						contig_26556	phytozomev11	mRNA	5356	8837	.	+	.	ID=PAC:16429444;Name=evm.TU.contig_26556.1;pacid=16429444;longest=1;Parent=gevm.TU.contig_26556.1
						contig_26556	phytozomev11	CDS	5356	5675	.	+	0	ID=PAC:16429444.CDS.1;Parent=PAC:16429444;pacid=16429444
						contig_26556	phytozomev11	CDS	6682	7447	.	+	0	ID=PAC:16429444.CDS.2;Parent=PAC:16429444;pacid=16429444
						contig_26556	phytozomev11	CDS	7860	7991	.	+	0	ID=PAC:16429444.CDS.3;Parent=PAC:16429444;pacid=16429444
						contig_26556	phytozomev11	CDS	8123	8188	.	+	0	ID=PAC:16429444.CDS.4;Parent=PAC:16429444;pacid=16429444
						contig_26556	phytozomev11	CDS	8320	8385	.	+	0	ID=PAC:16429444.CDS.5;Parent=PAC:16429444;pacid=16429444
						contig_26556	phytozomev11	CDS	8525	8563	.	+	0	ID=PAC:16429444.CDS.6;Parent=PAC:16429444;pacid=16429444
						contig_26556	phytozomev11	CDS	8673	8837	.	+	1	ID=PAC:16429444.CDS.7;Parent=PAC:16429444;pacid=16429444
						supercontig_23	phytozomev11	gene	783909	787425	.	+	.	ID=evm.TU.supercontig_23.65;Name=evm.TU.supercontig_23.65
						supercontig_23	phytozomev11	mRNA	783909	787425	.	+	.	ID=PAC:16414277;Name=evm.model.supercontig_23.65;pacid=16414277;longest=1;Parent=evm.TU.supercontig_23.65
						supercontig_23	phytozomev11	CDS	783909	784186	.	+	0	ID=PAC:16414277.CDS.1;Parent=PAC:16414277;pacid=16414277
						supercontig_23	phytozomev11	CDS	784637	784961	.	+	0	ID=PAC:16414277.CDS.2;Parent=PAC:16414277;pacid=16414277
						supercontig_23	phytozomev11	CDS	785302	785376	.	+	1	ID=PAC:16414277.CDS.3;Parent=PAC:16414277;pacid=16414277
						supercontig_23	phytozomev11	CDS	785674	785739	.	+	0	ID=PAC:16414277.CDS.4;Parent=PAC:16414277;pacid=16414277
						supercontig_23	phytozomev11	CDS	785991	786056	.	+	0	ID=PAC:16414277.CDS.5;Parent=PAC:16414277;pacid=16414277
						supercontig_23	phytozomev11	CDS	786255	786311	.	+	0	ID=PAC:16414277.CDS.6;Parent=PAC:16414277;pacid=16414277
						supercontig_23	phytozomev11	CDS	786612	786656	.	+	1	ID=PAC:16414277.CDS.7;Parent=PAC:16414277;pacid=16414277
						supercontig_23	phytozomev11	CDS	787024	787071	.	+	0	ID=PAC:16414277.CDS.8;Parent=PAC:16414277;pacid=16414277
						supercontig_23	phytozomev11	CDS	787291	787425	.	+	0	ID=PAC:16414277.CDS.9;Parent=PAC:16414277;pacid=16414277
