# Supplementary material for: Genome-wide analysis of basic helix-loop-helix transcription factors in papaya (Carica papaya L.)
Source: PeerJ. 2020 Jul 3;8:e9319. doi: 10.7717/peerj.9319 (PMC7341539; doi:10.7717/peerj.9319)
Supplement: Supplemental Information 6 — Fisher’s exact test was used to evaluate enriched GO terms. GO terms include three aspects: biological process, cellular component and molecular function. [file peerj-08-9319-s006.xlsx]

## Sheet: Sheet1
GO_acc	term_type	Term	queryitem	querytotal	entries	CpbHLH proteins id	CpbHLH proteins name
GO:0080090	P	regulation of primary metabolic process	46	54	// AT4G16430.1 // AT1G27740.1 // AT4G33880.1 // AT2G16910.1 // AT3G50330.1 // AT1G72210.1 // AT3G24140.1 // AT2G42280.1 // AT2G28160.1 // AT5G53210.1 // AT1G25330.1 // AT5G01310.1 // AT1G59640.2 // AT1G10120.1 // AT1G09530.1 // AT1G32640.1 // AT3G57800.1 // AT4G00870.1 // AT3G19860.2 // AT2G41130.1 // AT3G26744.1 // AT3G22100.1 // AT4G38070.1 // AT1G30670.1 // AT4G00050.1 // AT3G61950.1 // AT4G02…	evm.TU.contig_45808.1,evm.model.supercontig_142.14,evm.model.supercontig_106.57,evm.model.supercontig_20.95,evm.model.supercontig_55.142,evm.model.supercontig_55.64,evm.model.supercontig_59.132,evm.TU.contig_45766.1,evm.TU.contig_28125.2,evm.model.supercontig_3.51,evm.model.supercontig_65.44,evm.model.supercontig_120.27,evm.model.supercontig_5.303,evm.model.supercontig_160.32,evm.model.superconti…	CpbHLH031,CpbHLH046,CpbHLH050,CpbHLH066,CpbHLH008,CpbHLH021,CpbHLH002,CpbHLH053,CpbHLH028,CpbHLH010,CpbHLH038,CpbHLH054,CpbHLH051,CpbHLH044,CpbHLH037,CpbHLH070,CpbHLH009,CpbHLH071,CpbHLH022,CpbHLH069,CpbHLH062,CpbHLH049,CpbHLH055,CpbHLH015,CpbHLH063,CpbHLH016,CpbHLH033,CpbHLH048,CpbHLH059,CpbHLH073,CpbHLH001,CpbHLH029,CpbHLH056,CpbHLH007,CpbHLH041,CpbHLH052,CpbHLH013,CpbHLH043,CpbHLH057,CpbHLH024…
GO:0006350	P	transcription	46	54	// AT4G16430.1 // AT1G27740.1 // AT4G33880.1 // AT2G16910.1 // AT3G50330.1 // AT1G72210.1 // AT3G24140.1 // AT2G42280.1 // AT2G28160.1 // AT5G53210.1 // AT1G25330.1 // AT5G01310.1 // AT1G59640.2 // AT1G10120.1 // AT1G09530.1 // AT1G32640.1 // AT3G57800.1 // AT4G00870.1 // AT3G19860.2 // AT2G41130.1 // AT3G26744.1 // AT3G22100.1 // AT4G38070.1 // AT1G30670.1 // AT4G00050.1 // AT3G61950.1 // AT4G02…	evm.TU.contig_45808.1,evm.model.supercontig_142.14,evm.model.supercontig_106.57,evm.model.supercontig_20.95,evm.model.supercontig_55.142,evm.model.supercontig_55.64,evm.model.supercontig_59.132,evm.TU.contig_45766.1,evm.TU.contig_28125.2,evm.model.supercontig_3.51,evm.model.supercontig_65.44,evm.model.supercontig_120.27,evm.model.supercontig_5.303,evm.model.supercontig_160.32,evm.model.superconti…	CpbHLH031,CpbHLH046,CpbHLH050,CpbHLH066,CpbHLH008,CpbHLH021,CpbHLH002,CpbHLH053,CpbHLH028,CpbHLH010,CpbHLH038,CpbHLH054,CpbHLH051,CpbHLH044,CpbHLH037,CpbHLH070,CpbHLH009,CpbHLH071,CpbHLH022,CpbHLH069,CpbHLH062,CpbHLH049,CpbHLH055,CpbHLH015,CpbHLH063,CpbHLH016,CpbHLH033,CpbHLH048,CpbHLH059,CpbHLH073,CpbHLH001,CpbHLH029,CpbHLH056,CpbHLH007,CpbHLH041,CpbHLH052,CpbHLH013,CpbHLH043,CpbHLH057,CpbHLH024…
GO:0045449	P	regulation of transcription	45	54	// AT4G16430.1 // AT1G27740.1 // AT4G33880.1 // AT2G16910.1 // AT3G50330.1 // AT1G72210.1 // AT3G24140.1 // AT2G42280.1 // AT2G28160.1 // AT5G53210.1 // AT1G25330.1 // AT5G01310.1 // AT1G59640.2 // AT1G10120.1 // AT1G32640.1 // AT3G57800.1 // AT4G00870.1 // AT3G19860.2 // AT2G41130.1 // AT3G26744.1 // AT3G22100.1 // AT4G38070.1 // AT1G30670.1 // AT4G00050.1 // AT3G61950.1 // AT4G02590.1 // AT4G14…	evm.TU.contig_45808.1,evm.model.supercontig_142.14,evm.model.supercontig_106.57,evm.model.supercontig_20.95,evm.model.supercontig_55.142,evm.model.supercontig_55.64,evm.model.supercontig_59.132,evm.TU.contig_45766.1,evm.TU.contig_28125.2,evm.model.supercontig_3.51,evm.model.supercontig_65.44,evm.model.supercontig_120.27,evm.model.supercontig_5.303,evm.model.supercontig_160.32,evm.model.superconti…	CpbHLH031,CpbHLH046,CpbHLH050,CpbHLH066,CpbHLH008,CpbHLH021,CpbHLH002,CpbHLH053,CpbHLH028,CpbHLH010,CpbHLH038,CpbHLH054,CpbHLH051,CpbHLH044,CpbHLH070,CpbHLH009,CpbHLH071,CpbHLH022,CpbHLH069,CpbHLH062,CpbHLH049,CpbHLH055,CpbHLH015,CpbHLH063,CpbHLH016,CpbHLH033,CpbHLH048,CpbHLH059,CpbHLH073,CpbHLH001,CpbHLH029,CpbHLH056,CpbHLH007,CpbHLH041,CpbHLH052,CpbHLH013,CpbHLH043,CpbHLH057,CpbHLH024,CpbHLH023…
GO:0019219	P	regulation of nucleobase, nucleoside, nucleotide and nucleic acid metabolic process	45	54	// AT4G16430.1 // AT1G27740.1 // AT4G33880.1 // AT2G16910.1 // AT3G50330.1 // AT1G72210.1 // AT3G24140.1 // AT2G42280.1 // AT2G28160.1 // AT5G53210.1 // AT1G25330.1 // AT5G01310.1 // AT1G59640.2 // AT1G10120.1 // AT1G32640.1 // AT3G57800.1 // AT4G00870.1 // AT3G19860.2 // AT2G41130.1 // AT3G26744.1 // AT3G22100.1 // AT4G38070.1 // AT1G30670.1 // AT4G00050.1 // AT3G61950.1 // AT4G02590.1 // AT4G14…	evm.TU.contig_45808.1,evm.model.supercontig_142.14,evm.model.supercontigevm.TU.contig_45808.1,evm.model.supercontig_142.14,evm.model.supercontig_106.57,evm.model.supercontig_20.95,evm.model.supercontig_55.142,evm.model.supercontig_55.64,evm.model.supercontig_59.132,evm.TU.contig_45766.1,evm.TU.contig_28125.2,evm.model.supercontig_3.51,evm.model.supercontig_65.44,evm.model.supercontig_120.27,evm.m…	CpbHLH031,CpbHLH046,CpbHLH050,CpbHLH066,CpbHLH008,CpbHLH021,CpbHLH002,CpbHLH053,CpbHLH028,CpbHLH010,CpbHLH038,CpbHLH054,CpbHLH051,CpbHLH044,CpbHLH070,CpbHLH009,CpbHLH071,CpbHLH022,CpbHLH069,CpbHLH062,CpbHLH049,CpbHLH055,CpbHLH015,CpbHLH063,CpbHLH016,CpbHLH033,CpbHLH048,CpbHLH059,CpbHLH073,CpbHLH001,CpbHLH029,CpbHLH056,CpbHLH007,CpbHLH041,CpbHLH052,CpbHLH013,CpbHLH043,CpbHLH057,CpbHLH024,CpbHLH023…
GO:0010556	P	regulation of macromolecule biosynthetic process	45	54	// AT4G16430.1 // AT1G27740.1 // AT4G33880.1 // AT2G16910.1 // AT3G50330.1 // AT1G72210.1 // AT3G24140.1 // AT2G42280.1 // AT2G28160.1 // AT5G53210.1 // AT1G25330.1 // AT5G01310.1 // AT1G59640.2 // AT1G10120.1 // AT1G32640.1 // AT3G57800.1 // AT4G00870.1 // AT3G19860.2 // AT2G41130.1 // AT3G26744.1 // AT3G22100.1 // AT4G38070.1 // AT1G30670.1 // AT4G00050.1 // AT3G61950.1 // AT4G02590.1 // AT4G14…	evm.TU.contig_45808.1,evm.model.supercontig_142.14,evm.model.supercontigevm.TU.contig_45808.1,evm.model.supercontig_142.14,evm.model.supercontig_106.57,evm.model.supercontig_20.95,evm.model.supercontig_55.142,evm.model.supercontig_55.64,evm.model.supercontig_59.132,evm.TU.contig_45766.1,evm.TU.contig_28125.2,evm.model.supercontig_3.51,evm.model.supercontig_65.44,evm.model.supercontig_120.27,evm.m…	CpbHLH031,CpbHLH046,CpbHLH050,CpbHLH066,CpbHLH008,CpbHLH021,CpbHLH002,CpbHLH053,CpbHLH028,CpbHLH010,CpbHLH038,CpbHLH054,CpbHLH051,CpbHLH044,CpbHLH070,CpbHLH009,CpbHLH071,CpbHLH022,CpbHLH069,CpbHLH062,CpbHLH049,CpbHLH055,CpbHLH015,CpbHLH063,CpbHLH016,CpbHLH033,CpbHLH048,CpbHLH059,CpbHLH073,CpbHLH001,CpbHLH029,CpbHLH056,CpbHLH007,CpbHLH041,CpbHLH052,CpbHLH013,CpbHLH043,CpbHLH057,CpbHLH024,CpbHLH023…
GO:0031323	P	regulation of cellular metabolic process	46	54	// AT4G16430.1 // AT1G27740.1 // AT4G33880.1 // AT2G16910.1 // AT3G50330.1 // AT1G72210.1 // AT3G24140.1 // AT2G42280.1 // AT2G28160.1 // AT5G53210.1 // AT1G25330.1 // AT5G01310.1 // AT1G59640.2 // AT1G10120.1 // AT1G09530.1 // AT1G32640.1 // AT3G57800.1 // AT4G00870.1 // AT3G19860.2 // AT2G41130.1 // AT3G26744.1 // AT3G22100.1 // AT4G38070.1 // AT1G30670.1 // AT4G00050.1 // AT3G61950.1 // AT4G02…	evm.TU.contig_45808.1,evm.model.supercontig_142.14,evm.model.supercontig_106.57,evm.model.supercontig_20.95,evm.model.supercontig_55.142,evm.model.supercontig_55.64,evm.model.supercontig_59.132,evm.TU.contig_45766.1,evm.TU.contig_28125.2,evm.model.supercontig_3.51,evm.model.supercontig_65.44,evm.model.supercontig_120.27,evm.model.supercontig_5.303,evm.model.supercontig_160.32,evm.model.superconti…	CpbHLH031,CpbHLH046,CpbHLH050,CpbHLH066,CpbHLH008,CpbHLH021,CpbHLH002,CpbHLH053,CpbHLH028,CpbHLH010,CpbHLH038,CpbHLH054,CpbHLH051,CpbHLH044,CpbHLH037,CpbHLH070,CpbHLH009,CpbHLH071,CpbHLH022,CpbHLH069,CpbHLH062,CpbHLH049,CpbHLH055,CpbHLH015,CpbHLH063,CpbHLH016,CpbHLH033,CpbHLH048,CpbHLH059,CpbHLH073,CpbHLH001,CpbHLH029,CpbHLH056,CpbHLH007,CpbHLH041,CpbHLH052,CpbHLH013,CpbHLH043,CpbHLH057,CpbHLH024…
GO:0031326	P	regulation of cellular biosynthetic process	45	54	// AT4G16430.1 // AT1G27740.1 // AT4G33880.1 // AT2G16910.1 // AT3G50330.1 // AT1G72210.1 // AT3G24140.1 // AT2G42280.1 // AT2G28160.1 // AT5G53210.1 // AT1G25330.1 // AT5G01310.1 // AT1G59640.2 // AT1G10120.1 // AT1G32640.1 // AT3G57800.1 // AT4G00870.1 // AT3G19860.2 // AT2G41130.1 // AT3G26744.1 // AT3G22100.1 // AT4G38070.1 // AT1G30670.1 // AT4G00050.1 // AT3G61950.1 // AT4G02590.1 // AT4G14…	evm.TU.contig_45808.1,evm.model.supercontig_142.14,evm.model.supercontig_106.57,evm.model.supercontig_20.95,evm.model.supercontig_55.142,evm.model.supercontig_55.64,evm.model.supercontig_59.132,evm.TU.contig_45766.1,evm.TU.contig_28125.2,evm.model.supercontig_3.51,evm.model.supercontig_65.44,evm.model.supercontig_120.27,evm.model.supercontig_5.303,evm.model.supercontig_160.32,evm.model.superconti…	CpbHLH031,CpbHLH046,CpbHLH050,CpbHLH066,CpbHLH008,CpbHLH021,CpbHLH002,CpbHLH053,CpbHLH028,CpbHLH010,CpbHLH038,CpbHLH054,CpbHLH051,CpbHLH044,CpbHLH070,CpbHLH009,CpbHLH071,CpbHLH022,CpbHLH069,CpbHLH062,CpbHLH049,CpbHLH055,CpbHLH015,CpbHLH063,CpbHLH016,CpbHLH033,CpbHLH048,CpbHLH059,CpbHLH073,CpbHLH001,CpbHLH029,CpbHLH056,CpbHLH007,CpbHLH041,CpbHLH052,CpbHLH013,CpbHLH043,CpbHLH057,CpbHLH024,CpbHLH023…
GO:0009889	P	regulation of biosynthetic process	45	54	// AT4G16430.1 // AT1G27740.1 // AT4G33880.1 // AT2G16910.1 // AT3G50330.1 // AT1G72210.1 // AT3G24140.1 // AT2G42280.1 // AT2G28160.1 // AT5G53210.1 // AT1G25330.1 // AT5G01310.1 // AT1G59640.2 // AT1G10120.1 // AT1G32640.1 // AT3G57800.1 // AT4G00870.1 // AT3G19860.2 // AT2G41130.1 // AT3G26744.1 // AT3G22100.1 // AT4G38070.1 // AT1G30670.1 // AT4G00050.1 // AT3G61950.1 // AT4G02590.1 // AT4G14…	evm.TU.contig_45808.1,evm.model.supercontig_142.14,evm.model.supercontig_106.57,evm.model.supercontig_20.95,evm.model.supercontig_55.142,evm.model.supercontig_55.64,evm.model.supercontig_59.132,evm.TU.contig_45766.1,evm.TU.contig_28125.2,evm.model.supercontig_3.51,evm.model.supercontig_65.44,evm.model.supercontig_120.27,evm.model.supercontig_5.303,evm.model.supercontig_160.32,evm.model.superconti…	CpbHLH031,CpbHLH046,CpbHLH050,CpbHLH066,CpbHLH008,CpbHLH021,CpbHLH002,CpbHLH053,CpbHLH028,CpbHLH010,CpbHLH038,CpbHLH054,CpbHLH051,CpbHLH044,CpbHLH070,CpbHLH009,CpbHLH071,CpbHLH022,CpbHLH069,CpbHLH062,CpbHLH049,CpbHLH055,CpbHLH015,CpbHLH063,CpbHLH016,CpbHLH033,CpbHLH048,CpbHLH059,CpbHLH073,CpbHLH001,CpbHLH029,CpbHLH056,CpbHLH007,CpbHLH041,CpbHLH052,CpbHLH013,CpbHLH043,CpbHLH057,CpbHLH024,CpbHLH023…
GO:0051171	P	regulation of nitrogen compound metabolic process	45	54	// AT4G16430.1 // AT1G27740.1 // AT4G33880.1 // AT2G16910.1 // AT3G50330.1 // AT1G72210.1 // AT3G24140.1 // AT2G42280.1 // AT2G28160.1 // AT5G53210.1 // AT1G25330.1 // AT5G01310.1 // AT1G59640.2 // AT1G10120.1 // AT1G32640.1 // AT3G57800.1 // AT4G00870.1 // AT3G19860.2 // AT2G41130.1 // AT3G26744.1 // AT3G22100.1 // AT4G38070.1 // AT1G30670.1 // AT4G00050.1 // AT3G61950.1 // AT4G02590.1 // AT4G14…	evm.TU.contig_45808.1,evm.model.supercontig_142.14,evm.model.supercontig_106.57,evm.model.supercontig_20.95,evm.model.supercontig_55.142,evm.model.supercontig_55.64,evm.model.supercontig_59.132,evm.TU.contig_45766.1,evm.TU.contig_28125.2,evm.model.supercontig_3.51,evm.model.supercontig_65.44,evm.model.supercontig_120.27,evm.model.supercontig_5.303,evm.model.supercontig_160.32,evm.model.superconti…	CpbHLH031,CpbHLH046,CpbHLH050,CpbHLH066,CpbHLH008,CpbHLH021,CpbHLH002,CpbHLH053,CpbHLH028,CpbHLH010,CpbHLH038,CpbHLH054,CpbHLH051,CpbHLH044,CpbHLH070,CpbHLH009,CpbHLH071,CpbHLH022,CpbHLH069,CpbHLH062,CpbHLH049,CpbHLH055,CpbHLH015,CpbHLH063,CpbHLH016,CpbHLH033,CpbHLH048,CpbHLH059,CpbHLH073,CpbHLH001,CpbHLH029,CpbHLH056,CpbHLH007,CpbHLH041,CpbHLH052,CpbHLH013,CpbHLH043,CpbHLH057,CpbHLH024,CpbHLH023…
GO:0010468	P	regulation of gene expression	45	54	// AT4G16430.1 // AT1G27740.1 // AT4G33880.1 // AT2G16910.1 // AT3G50330.1 // AT1G72210.1 // AT3G24140.1 // AT2G42280.1 // AT2G28160.1 // AT5G53210.1 // AT1G25330.1 // AT5G01310.1 // AT1G59640.2 // AT1G10120.1 // AT1G32640.1 // AT3G57800.1 // AT4G00870.1 // AT3G19860.2 // AT2G41130.1 // AT3G26744.1 // AT3G22100.1 // AT4G38070.1 // AT1G30670.1 // AT4G00050.1 // AT3G61950.1 // AT4G02590.1 // AT4G14…	evm.TU.contig_45808.1,evm.model.supercontig_142.14,evm.model.supercontig_106.57,evm.model.supercontig_20.95,evm.model.supercontig_55.142,evm.model.supercontig_55.64,evm.model.supercontig_59.132,evm.TU.contig_45766.1,evm.TU.contig_28125.2,evm.model.supercontig_3.51,evm.model.supercontig_65.44,evm.model.supercontig_120.27,evm.model.supercontig_5.303,evm.model.supercontig_160.32,evm.model.superconti…	CpbHLH031,CpbHLH046,CpbHLH050,CpbHLH066,CpbHLH008,CpbHLH021,CpbHLH002,CpbHLH053,CpbHLH028,CpbHLH010,CpbHLH038,CpbHLH054,CpbHLH051,CpbHLH044,CpbHLH070,CpbHLH009,CpbHLH071,CpbHLH022,CpbHLH069,CpbHLH062,CpbHLH049,CpbHLH055,CpbHLH015,CpbHLH063,CpbHLH016,CpbHLH033,CpbHLH048,CpbHLH059,CpbHLH073,CpbHLH001,CpbHLH029,CpbHLH056,CpbHLH007,CpbHLH041,CpbHLH052,CpbHLH013,CpbHLH043,CpbHLH057,CpbHLH024,CpbHLH023…
GO:0019222	P	regulation of metabolic process	46	54	// AT4G16430.1 // AT1G27740.1 // AT4G33880.1 // AT2G16910.1 // AT3G50330.1 // AT1G72210.1 // AT3G24140.1 // AT2G42280.1 // AT2G28160.1 // AT5G53210.1 // AT1G25330.1 // AT5G01310.1 // AT1G59640.2 // AT1G10120.1 // AT1G09530.1 // AT1G32640.1 // AT3G57800.1 // AT4G00870.1 // AT3G19860.2 // AT2G41130.1 // AT3G26744.1 // AT3G22100.1 // AT4G38070.1 // AT1G30670.1 // AT4G00050.1 // AT3G61950.1 // AT4G02…	evm.TU.contig_45808.1,evm.model.supercontig_142.14,evm.model.supercontig_106.57,evm.model.supercontig_20.95,evm.model.supercontig_55.142,evm.model.supercontig_55.64,evm.model.supercontig_59.132,evm.TU.contig_45766.1,evm.TU.contig_28125.2,evm.model.supercontig_3.51,evm.model.supercontig_65.44,evm.model.supercontig_120.27,evm.model.supercontig_5.303,evm.model.supercontig_160.32,evm.model.superconti…	CpbHLH031,CpbHLH046,CpbHLH050,CpbHLH066,CpbHLH008,CpbHLH021,CpbHLH002,CpbHLH053,CpbHLH028,CpbHLH010,CpbHLH038,CpbHLH054,CpbHLH051,CpbHLH044,CpbHLH037,CpbHLH070,CpbHLH009,CpbHLH071,CpbHLH022,CpbHLH069,CpbHLH062,CpbHLH049,CpbHLH055,CpbHLH015,CpbHLH063,CpbHLH016,CpbHLH033,CpbHLH048,CpbHLH059,CpbHLH073,CpbHLH001,CpbHLH029,CpbHLH056,CpbHLH007,CpbHLH041,CpbHLH052,CpbHLH013,CpbHLH043,CpbHLH057,CpbHLH024…
GO:0060255	P	regulation of macromolecule metabolic process	45	54	// AT4G16430.1 // AT1G27740.1 // AT4G33880.1 // AT2G16910.1 // AT3G50330.1 // AT1G72210.1 // AT3G24140.1 // AT2G42280.1 // AT2G28160.1 // AT5G53210.1 // AT1G25330.1 // AT5G01310.1 // AT1G59640.2 // AT1G10120.1 // AT1G32640.1 // AT3G57800.1 // AT4G00870.1 // AT3G19860.2 // AT2G41130.1 // AT3G26744.1 // AT3G22100.1 // AT4G38070.1 // AT1G30670.1 // AT4G00050.1 // AT3G61950.1 // AT4G02590.1 // AT4G14…	evm.TU.contig_45808.1,evm.model.supercontig_142.14,evm.model.supercontig_106.57,evm.model.supercontig_20.95,evm.model.supercontig_55.142,evm.model.supercontig_55.64,evm.model.supercontig_59.132,evm.TU.contig_45766.1,evm.TU.contig_28125.2,evm.model.supercontig_3.51,evm.model.supercontig_65.44,evm.model.supercontig_120.27,evm.model.supercontig_5.303,evm.model.supercontig_160.32,evm.model.superconti…	CpbHLH031,CpbHLH046,CpbHLH050,CpbHLH066,CpbHLH008,CpbHLH021,CpbHLH002,CpbHLH053,CpbHLH028,CpbHLH010,CpbHLH038,CpbHLH054,CpbHLH051,CpbHLH044,CpbHLH070,CpbHLH009,CpbHLH071,CpbHLH022,CpbHLH069,CpbHLH062,CpbHLH049,CpbHLH055,CpbHLH015,CpbHLH063,CpbHLH016,CpbHLH033,CpbHLH048,CpbHLH059,CpbHLH073,CpbHLH001,CpbHLH029,CpbHLH056,CpbHLH007,CpbHLH041,CpbHLH052,CpbHLH013,CpbHLH043,CpbHLH057,CpbHLH024,CpbHLH023…
GO:0006139	P	nucleobase, nucleoside, nucleotide and nucleic acid metabolic process	46	54	// AT4G16430.1 // AT1G27740.1 // AT4G33880.1 // AT2G16910.1 // AT3G50330.1 // AT1G72210.1 // AT3G24140.1 // AT2G42280.1 // AT2G28160.1 // AT5G53210.1 // AT1G25330.1 // AT5G01310.1 // AT1G59640.2 // AT1G10120.1 // AT1G32640.1 // AT3G57800.1 // AT4G00870.1 // AT3G19860.2 // AT2G41130.1 // AT3G26744.1 // AT3G22100.1 // AT4G38070.1 // AT1G30670.1 // AT4G00050.1 // AT3G61950.1 // AT4G02590.1 // AT4G14…	evm.TU.contig_45808.1,evm.model.supercontig_142.14,evm.model.supercontig_106.57,evm.model.supercontig_20.95,evm.model.supercontig_55.142,evm.model.supercontig_55.64,evm.model.supercontig_59.132,evm.TU.contig_45766.1,evm.TU.contig_28125.2,evm.model.supercontig_3.51,evm.model.supercontig_65.44,evm.model.supercontig_120.27,evm.model.supercontig_5.303,evm.model.supercontig_160.32,evm.model.superconti…	CpbHLH031,CpbHLH046,CpbHLH050,CpbHLH066,CpbHLH008,CpbHLH021,CpbHLH002,CpbHLH053,CpbHLH028,CpbHLH010,CpbHLH038,CpbHLH054,CpbHLH051,CpbHLH044,CpbHLH070,CpbHLH009,CpbHLH071,CpbHLH022,CpbHLH069,CpbHLH062,CpbHLH049,CpbHLH055,CpbHLH015,CpbHLH063,CpbHLH016,CpbHLH033,CpbHLH048,CpbHLH059,CpbHLH073,CpbHLH001,CpbHLH029,CpbHLH056,CpbHLH007,CpbHLH041,CpbHLH052,CpbHLH013,CpbHLH043,CpbHLH057,CpbHLH024,CpbHLH023…
GO:0050794	P	regulation of cellular process	46	54	// AT4G16430.1 // AT1G27740.1 // AT4G33880.1 // AT2G16910.1 // AT3G50330.1 // AT1G72210.1 // AT3G24140.1 // AT2G42280.1 // AT2G28160.1 // AT5G53210.1 // AT1G25330.1 // AT5G01310.1 // AT1G59640.2 // AT1G10120.1 // AT1G09530.1 // AT1G32640.1 // AT3G57800.1 // AT4G00870.1 // AT3G19860.2 // AT2G41130.1 // AT3G26744.1 // AT3G22100.1 // AT4G38070.1 // AT1G30670.1 // AT4G00050.1 // AT3G61950.1 // AT4G02…	evm.TU.contig_45808.1,evm.model.supercontig_142.14,evm.model.supercontig_106.57,evm.model.supercontig_20.95,evm.model.supercontig_55.142,evm.model.supercontig_55.64,evm.model.supercontig_59.132,evm.TU.contig_45766.1,evm.TU.contig_28125.2,evm.model.supercontig_3.51,evm.model.supercontig_65.44,evm.model.supercontig_120.27,evm.model.supercontig_5.303,evm.model.supercontig_160.32,evm.model.superconti…	CpbHLH031,CpbHLH046,CpbHLH050,CpbHLH066,CpbHLH008,CpbHLH021,CpbHLH002,CpbHLH053,CpbHLH028,CpbHLH010,CpbHLH038,CpbHLH054,CpbHLH051,CpbHLH044,CpbHLH037,CpbHLH070,CpbHLH009,CpbHLH071,CpbHLH022,CpbHLH069,CpbHLH062,CpbHLH049,CpbHLH055,CpbHLH015,CpbHLH063,CpbHLH016,CpbHLH033,CpbHLH048,CpbHLH059,CpbHLH073,CpbHLH001,CpbHLH029,CpbHLH056,CpbHLH007,CpbHLH041,CpbHLH052,CpbHLH013,CpbHLH043,CpbHLH057,CpbHLH024…
GO:0034645	P	cellular macromolecule biosynthetic process	46	54	// AT4G16430.1 // AT1G27740.1 // AT4G33880.1 // AT2G16910.1 // AT3G50330.1 // AT1G72210.1 // AT3G24140.1 // AT2G42280.1 // AT2G28160.1 // AT5G53210.1 // AT1G25330.1 // AT5G01310.1 // AT1G59640.2 // AT1G10120.1 // AT1G32640.1 // AT3G57800.1 // AT4G00870.1 // AT3G19860.2 // AT2G41130.1 // AT3G26744.1 // AT3G22100.1 // AT4G38070.1 // AT1G30670.1 // AT4G00050.1 // AT3G61950.1 // AT4G02590.1 // AT4G14…	evm.TU.contig_45808.1,evm.model.supercontig_142.14,evm.model.supercontig_106.57,evm.model.supercontig_20.95,evm.model.supercontig_55.142,evm.model.supercontig_55.64,evm.model.supercontig_59.132,evm.TU.contig_45766.1,evm.TU.contig_28125.2,evm.model.supercontig_3.51,evm.model.supercontig_65.44,evm.model.supercontig_120.27,evm.model.supercontig_5.303,evm.model.supercontig_160.32,evm.model.superconti…	CpbHLH031,CpbHLH046,CpbHLH050,CpbHLH066,CpbHLH008,CpbHLH021,CpbHLH002,CpbHLH053,CpbHLH028,CpbHLH010,CpbHLH038,CpbHLH054,CpbHLH051,CpbHLH044,CpbHLH070,CpbHLH009,CpbHLH071,CpbHLH022,CpbHLH069,CpbHLH062,CpbHLH049,CpbHLH055,CpbHLH015,CpbHLH063,CpbHLH016,CpbHLH033,CpbHLH048,CpbHLH059,CpbHLH073,CpbHLH001,CpbHLH029,CpbHLH056,CpbHLH007,CpbHLH041,CpbHLH052,CpbHLH013,CpbHLH043,CpbHLH057,CpbHLH024,CpbHLH023…
GO:0009059	P	macromolecule biosynthetic process	46	54	// AT4G16430.1 // AT1G27740.1 // AT4G33880.1 // AT2G16910.1 // AT3G50330.1 // AT1G72210.1 // AT3G24140.1 // AT2G42280.1 // AT2G28160.1 // AT5G53210.1 // AT1G25330.1 // AT5G01310.1 // AT1G59640.2 // AT1G10120.1 // AT1G32640.1 // AT3G57800.1 // AT4G00870.1 // AT3G19860.2 // AT2G41130.1 // AT3G26744.1 // AT3G22100.1 // AT4G38070.1 // AT1G30670.1 // AT4G00050.1 // AT3G61950.1 // AT4G02590.1 // AT4G14…	evm.TU.contig_45808.1,evm.model.supercontig_142.14,evm.model.supercontig_106.57,evm.model.supercontig_20.95,evm.model.supercontig_55.142,evm.model.supercontig_55.64,evm.model.supercontig_59.132,evm.TU.contig_45766.1,evm.TU.contig_28125.2,evm.model.supercontig_3.51,evm.model.supercontig_65.44,evm.model.supercontig_120.27,evm.model.supercontig_5.303,evm.model.supercontig_160.32,evm.model.superconti…	CpbHLH031,CpbHLH046,CpbHLH050,CpbHLH066,CpbHLH008,CpbHLH021,CpbHLH002,CpbHLH053,CpbHLH028,CpbHLH010,CpbHLH038,CpbHLH054,CpbHLH051,CpbHLH044,CpbHLH070,CpbHLH009,CpbHLH071,CpbHLH022,CpbHLH069,CpbHLH062,CpbHLH049,CpbHLH055,CpbHLH015,CpbHLH063,CpbHLH016,CpbHLH033,CpbHLH048,CpbHLH059,CpbHLH073,CpbHLH001,CpbHLH029,CpbHLH056,CpbHLH007,CpbHLH041,CpbHLH052,CpbHLH013,CpbHLH043,CpbHLH057,CpbHLH024,CpbHLH023…
GO:0006807	P	nitrogen compound metabolic process	46	54	// AT4G16430.1 // AT1G27740.1 // AT4G33880.1 // AT2G16910.1 // AT3G50330.1 // AT1G72210.1 // AT3G24140.1 // AT2G42280.1 // AT2G28160.1 // AT5G53210.1 // AT1G25330.1 // AT5G01310.1 // AT1G59640.2 // AT1G10120.1 // AT1G32640.1 // AT3G57800.1 // AT4G00870.1 // AT3G19860.2 // AT2G41130.1 // AT3G26744.1 // AT3G22100.1 // AT4G38070.1 // AT1G30670.1 // AT4G00050.1 // AT3G61950.1 // AT4G02590.1 // AT4G14…	evm.TU.contig_45808.1,evm.model.supercontig_142.14,evm.model.supercontig_106.57,evm.model.supercontig_20.95,evm.model.supercontig_55.142,evm.model.supercontig_55.64,evm.model.supercontig_59.132,evm.TU.contig_45766.1,evm.TU.contig_28125.2,evm.model.supercontig_3.51,evm.model.supercontig_65.44,evm.model.supercontig_120.27,evm.model.supercontig_5.303,evm.model.supercontig_160.32,evm.model.superconti…	CpbHLH031,CpbHLH046,CpbHLH050,CpbHLH066,CpbHLH008,CpbHLH021,CpbHLH002,CpbHLH053,CpbHLH028,CpbHLH010,CpbHLH038,CpbHLH054,CpbHLH051,CpbHLH044,CpbHLH070,CpbHLH009,CpbHLH071,CpbHLH022,CpbHLH069,CpbHLH062,CpbHLH049,CpbHLH055,CpbHLH015,CpbHLH063,CpbHLH016,CpbHLH033,CpbHLH048,CpbHLH059,CpbHLH073,CpbHLH001,CpbHLH029,CpbHLH056,CpbHLH007,CpbHLH041,CpbHLH052,CpbHLH013,CpbHLH043,CpbHLH057,CpbHLH024,CpbHLH023…
GO:0010467	P	gene expression	46	54	// AT4G16430.1 // AT1G27740.1 // AT4G33880.1 // AT2G16910.1 // AT3G50330.1 // AT1G72210.1 // AT3G24140.1 // AT2G42280.1 // AT2G28160.1 // AT5G53210.1 // AT1G25330.1 // AT5G01310.1 // AT1G59640.2 // AT1G10120.1 // AT1G32640.1 // AT3G57800.1 // AT4G00870.1 // AT3G19860.2 // AT2G41130.1 // AT3G26744.1 // AT3G22100.1 // AT4G38070.1 // AT1G30670.1 // AT4G00050.1 // AT3G61950.1 // AT4G02590.1 // AT4G14…	evm.TU.contig_45808.1,evm.model.supercontig_142.14,evm.model.supercontig_106.57,evm.model.supercontig_20.95,evm.model.supercontig_55.142,evm.model.supercontig_55.64,evm.model.supercontig_59.132,evm.TU.contig_45766.1,evm.TU.contig_28125.2,evm.model.supercontig_3.51,evm.model.supercontig_65.44,evm.model.supercontig_120.27,evm.model.supercontig_5.303,evm.model.supercontig_160.32,evm.model.superconti…	CpbHLH031,CpbHLH046,CpbHLH050,CpbHLH066,CpbHLH008,CpbHLH021,CpbHLH002,CpbHLH053,CpbHLH028,CpbHLH010,CpbHLH038,CpbHLH054,CpbHLH051,CpbHLH044,CpbHLH070,CpbHLH009,CpbHLH071,CpbHLH022,CpbHLH069,CpbHLH062,CpbHLH049,CpbHLH055,CpbHLH015,CpbHLH063,CpbHLH016,CpbHLH033,CpbHLH048,CpbHLH059,CpbHLH073,CpbHLH001,CpbHLH029,CpbHLH056,CpbHLH007,CpbHLH041,CpbHLH052,CpbHLH013,CpbHLH043,CpbHLH057,CpbHLH024,CpbHLH023…
GO:0044249	P	cellular biosynthetic process	46	54	// AT4G16430.1 // AT1G27740.1 // AT4G33880.1 // AT2G16910.1 // AT3G50330.1 // AT1G72210.1 // AT3G24140.1 // AT2G42280.1 // AT2G28160.1 // AT5G53210.1 // AT1G25330.1 // AT5G01310.1 // AT1G59640.2 // AT1G10120.1 // AT1G32640.1 // AT3G57800.1 // AT4G00870.1 // AT3G19860.2 // AT2G41130.1 // AT3G26744.1 // AT3G22100.1 // AT4G38070.1 // AT1G30670.1 // AT4G00050.1 // AT3G61950.1 // AT4G02590.1 // AT4G14…	evm.TU.contig_45808.1,evm.model.supercontig_142.14,evm.model.supercontig_106.57,evm.model.supercontig_20.95,evm.model.supercontig_55.142,evm.model.supercontig_55.64,evm.model.supercontig_59.132,evm.TU.contig_45766.1,evm.TU.contig_28125.2,evm.model.supercontig_3.51,evm.model.supercontig_65.44,evm.model.supercontig_120.27,evm.model.supercontig_5.303,evm.model.supercontig_160.32,evm.model.superconti…	CpbHLH031,CpbHLH046,CpbHLH050,CpbHLH066,CpbHLH008,CpbHLH021,CpbHLH002,CpbHLH053,CpbHLH028,CpbHLH010,CpbHLH038,CpbHLH054,CpbHLH051,CpbHLH044,CpbHLH070,CpbHLH009,CpbHLH071,CpbHLH022,CpbHLH069,CpbHLH062,CpbHLH049,CpbHLH055,CpbHLH015,CpbHLH063,CpbHLH016,CpbHLH033,CpbHLH048,CpbHLH059,CpbHLH073,CpbHLH001,CpbHLH029,CpbHLH056,CpbHLH007,CpbHLH041,CpbHLH052,CpbHLH013,CpbHLH043,CpbHLH057,CpbHLH024,CpbHLH023…
GO:0009058	P	biosynthetic process	46	54	// AT4G16430.1 // AT1G27740.1 // AT4G33880.1 // AT2G16910.1 // AT3G50330.1 // AT1G72210.1 // AT3G24140.1 // AT2G42280.1 // AT2G28160.1 // AT5G53210.1 // AT1G25330.1 // AT5G01310.1 // AT1G59640.2 // AT1G10120.1 // AT1G32640.1 // AT3G57800.1 // AT4G00870.1 // AT3G19860.2 // AT2G41130.1 // AT3G26744.1 // AT3G22100.1 // AT4G38070.1 // AT1G30670.1 // AT4G00050.1 // AT3G61950.1 // AT4G02590.1 // AT4G14…	evm.TU.contig_45808.1,evm.model.supercontig_142.14,evm.model.supercontig_106.57,evm.model.supercontig_20.95,evm.model.supercontig_55.142,evm.model.supercontig_55.64,evm.model.supercontig_59.132,evm.TU.contig_45766.1,evm.TU.contig_28125.2,evm.model.supercontig_3.51,evm.model.supercontig_65.44,evm.model.supercontig_120.27,evm.model.supercontig_5.303,evm.model.supercontig_160.32,evm.model.superconti…	CpbHLH031,CpbHLH046,CpbHLH050,CpbHLH066,CpbHLH008,CpbHLH021,CpbHLH002,CpbHLH053,CpbHLH028,CpbHLH010,CpbHLH038,CpbHLH054,CpbHLH051,CpbHLH044,CpbHLH070,CpbHLH009,CpbHLH071,CpbHLH022,CpbHLH069,CpbHLH062,CpbHLH049,CpbHLH055,CpbHLH015,CpbHLH063,CpbHLH016,CpbHLH033,CpbHLH048,CpbHLH059,CpbHLH073,CpbHLH001,CpbHLH029,CpbHLH056,CpbHLH007,CpbHLH041,CpbHLH052,CpbHLH013,CpbHLH043,CpbHLH057,CpbHLH024,CpbHLH023…
GO:0044260	P	cellular macromolecule metabolic process	46	54	// AT4G16430.1 // AT1G27740.1 // AT4G33880.1 // AT2G16910.1 // AT3G50330.1 // AT1G72210.1 // AT3G24140.1 // AT2G42280.1 // AT2G28160.1 // AT5G53210.1 // AT1G25330.1 // AT5G01310.1 // AT1G59640.2 // AT1G10120.1 // AT1G32640.1 // AT3G57800.1 // AT4G00870.1 // AT3G19860.2 // AT2G41130.1 // AT3G26744.1 // AT3G22100.1 // AT4G38070.1 // AT1G30670.1 // AT4G00050.1 // AT3G61950.1 // AT4G02590.1 // AT4G14…	evm.TU.contig_45808.1,evm.model.supercontig_142.14,evm.model.supercontig_106.57,evm.model.supercontig_20.95,evm.model.supercontig_55.142,evm.model.supercontig_55.64,evm.model.supercontig_59.132,evm.TU.contig_45766.1,evm.TU.contig_28125.2,evm.model.supercontig_3.51,evm.model.supercontig_65.44,evm.model.supercontig_120.27,evm.model.supercontig_5.303,evm.model.supercontig_160.32,evm.model.superconti…	CpbHLH031,CpbHLH046,CpbHLH050,CpbHLH066,CpbHLH008,CpbHLH021,CpbHLH002,CpbHLH053,CpbHLH028,CpbHLH010,CpbHLH038,CpbHLH054,CpbHLH051,CpbHLH044,CpbHLH070,CpbHLH009,CpbHLH071,CpbHLH022,CpbHLH069,CpbHLH062,CpbHLH049,CpbHLH055,CpbHLH015,CpbHLH063,CpbHLH016,CpbHLH033,CpbHLH048,CpbHLH059,CpbHLH073,CpbHLH001,CpbHLH029,CpbHLH056,CpbHLH007,CpbHLH041,CpbHLH052,CpbHLH013,CpbHLH043,CpbHLH057,CpbHLH024,CpbHLH023…
GO:0043170	P	macromolecule metabolic process	46	54	// AT4G16430.1 // AT1G27740.1 // AT4G33880.1 // AT2G16910.1 // AT3G50330.1 // AT1G72210.1 // AT3G24140.1 // AT2G42280.1 // AT2G28160.1 // AT5G53210.1 // AT1G25330.1 // AT5G01310.1 // AT1G59640.2 // AT1G10120.1 // AT1G32640.1 // AT3G57800.1 // AT4G00870.1 // AT3G19860.2 // AT2G41130.1 // AT3G26744.1 // AT3G22100.1 // AT4G38070.1 // AT1G30670.1 // AT4G00050.1 // AT3G61950.1 // AT4G02590.1 // AT4G14…	evm.TU.contig_45808.1,evm.model.supercontig_142.14,evm.model.supercontig_106.57,evm.model.supercontig_20.95,evm.model.supercontig_55.142,evm.model.supercontig_55.64,evm.model.supercontig_59.132,evm.TU.contig_45766.1,evm.TU.contig_28125.2,evm.model.supercontig_3.51,evm.model.supercontig_65.44,evm.model.supercontig_120.27,evm.model.supercontig_5.303,evm.model.supercontig_160.32,evm.model.superconti…	CpbHLH031,CpbHLH046,CpbHLH050,CpbHLH066,CpbHLH008,CpbHLH021,CpbHLH002,CpbHLH053,CpbHLH028,CpbHLH010,CpbHLH038,CpbHLH054,CpbHLH051,CpbHLH044,CpbHLH070,CpbHLH009,CpbHLH071,CpbHLH022,CpbHLH069,CpbHLH062,CpbHLH049,CpbHLH055,CpbHLH015,CpbHLH063,CpbHLH016,CpbHLH033,CpbHLH048,CpbHLH059,CpbHLH073,CpbHLH001,CpbHLH029,CpbHLH056,CpbHLH007,CpbHLH041,CpbHLH052,CpbHLH013,CpbHLH043,CpbHLH057,CpbHLH024,CpbHLH023…
GO:0044237	P	cellular metabolic process	47	54	// AT4G16430.1 // AT1G27740.1 // AT4G33880.1 // AT2G16910.1 // AT3G50330.1 // AT1G72210.1 // AT3G24140.1 // AT2G42280.1 // AT2G28160.1 // AT5G53210.1 // AT1G25330.1 // AT5G01310.1 // AT1G59640.2 // AT1G10120.1 // AT1G09530.1 // AT1G32640.1 // AT3G57800.1 // AT4G00870.1 // AT3G19860.2 // AT2G41130.1 // AT3G26744.1 // AT3G22100.1 // AT4G38070.1 // AT1G30670.1 // AT4G00050.1 // AT3G61950.1 // AT4G02…	evm.TU.contig_45808.1,evm.model.supercontig_142.14,evm.model.supercontig_106.57,evm.model.supercontig_20.95,evm.model.supercontig_55.142,evm.model.supercontig_55.64,evm.model.supercontig_59.132,evm.TU.contig_45766.1,evm.TU.contig_28125.2,evm.model.supercontig_3.51,evm.model.supercontig_65.44,evm.model.supercontig_120.27,evm.model.supercontig_5.303,evm.model.supercontig_160.32,evm.model.superconti…	CpbHLH031,CpbHLH046,CpbHLH050,CpbHLH066,CpbHLH008,CpbHLH021,CpbHLH002,CpbHLH053,CpbHLH028,CpbHLH010,CpbHLH038,CpbHLH054,CpbHLH051,CpbHLH044,CpbHLH037,CpbHLH070,CpbHLH009,CpbHLH071,CpbHLH022,CpbHLH069,CpbHLH062,CpbHLH049,CpbHLH055,CpbHLH015,CpbHLH063,CpbHLH016,CpbHLH033,CpbHLH048,CpbHLH059,CpbHLH073,CpbHLH001,CpbHLH029,CpbHLH056,CpbHLH007,CpbHLH041,CpbHLH052,CpbHLH013,CpbHLH043,CpbHLH057,CpbHLH024…
GO:0044238	P	primary metabolic process	47	54	// AT4G16430.1 // AT1G27740.1 // AT4G33880.1 // AT2G16910.1 // AT3G50330.1 // AT1G72210.1 // AT3G24140.1 // AT2G42280.1 // AT2G28160.1 // AT5G53210.1 // AT1G25330.1 // AT5G01310.1 // AT1G59640.2 // AT1G10120.1 // AT1G09530.1 // AT1G32640.1 // AT3G57800.1 // AT4G00870.1 // AT3G19860.2 // AT2G41130.1 // AT3G26744.1 // AT3G22100.1 // AT4G38070.1 // AT1G30670.1 // AT4G00050.1 // AT3G61950.1 // AT4G02…	evm.TU.contig_45808.1,evm.model.supercontig_142.14,evm.model.supercontig_106.57,evm.model.supercontig_20.95,evm.model.supercontig_55.142,evm.model.supercontig_55.64,evm.model.supercontig_59.132,evm.TU.contig_45766.1,evm.TU.contig_28125.2,evm.model.supercontig_3.51,evm.model.supercontig_65.44,evm.model.supercontig_120.27,evm.model.supercontig_5.303,evm.model.supercontig_160.32,evm.model.superconti…	CpbHLH031,CpbHLH046,CpbHLH050,CpbHLH066,CpbHLH008,CpbHLH021,CpbHLH002,CpbHLH053,CpbHLH028,CpbHLH010,CpbHLH038,CpbHLH054,CpbHLH051,CpbHLH044,CpbHLH037,CpbHLH070,CpbHLH009,CpbHLH071,CpbHLH022,CpbHLH069,CpbHLH062,CpbHLH049,CpbHLH055,CpbHLH015,CpbHLH063,CpbHLH016,CpbHLH033,CpbHLH048,CpbHLH059,CpbHLH073,CpbHLH001,CpbHLH029,CpbHLH056,CpbHLH007,CpbHLH041,CpbHLH052,CpbHLH013,CpbHLH043,CpbHLH057,CpbHLH024…
GO:0008152	P	metabolic process	47	54	// AT4G16430.1 // AT1G27740.1 // AT4G33880.1 // AT2G16910.1 // AT3G50330.1 // AT1G72210.1 // AT3G24140.1 // AT2G42280.1 // AT2G28160.1 // AT5G53210.1 // AT1G25330.1 // AT5G01310.1 // AT1G59640.2 // AT1G10120.1 // AT1G09530.1 // AT1G32640.1 // AT3G57800.1 // AT4G00870.1 // AT3G19860.2 // AT2G41130.1 // AT3G26744.1 // AT3G22100.1 // AT4G38070.1 // AT1G30670.1 // AT4G00050.1 // AT3G61950.1 // AT4G02…	evm.TU.contig_45808.1,evm.model.supercontig_142.14,evm.model.supercontig_106.57,evm.model.supercontig_20.95,evm.model.supercontig_55.142,evm.model.supercontig_55.64,evm.model.supercontig_59.132,evm.TU.contig_45766.1,evm.TU.contig_28125.2,evm.model.supercontig_3.51,evm.model.supercontig_65.44,evm.model.supercontig_120.27,evm.model.supercontig_5.303,evm.model.supercontig_160.32,evm.model.superconti…	CpbHLH031,CpbHLH046,CpbHLH050,CpbHLH066,CpbHLH008,CpbHLH021,CpbHLH002,CpbHLH053,CpbHLH028,CpbHLH010,CpbHLH038,CpbHLH054,CpbHLH051,CpbHLH044,CpbHLH037,CpbHLH070,CpbHLH009,CpbHLH071,CpbHLH022,CpbHLH069,CpbHLH062,CpbHLH049,CpbHLH055,CpbHLH015,CpbHLH063,CpbHLH016,CpbHLH033,CpbHLH048,CpbHLH059,CpbHLH073,CpbHLH001,CpbHLH029,CpbHLH056,CpbHLH007,CpbHLH041,CpbHLH052,CpbHLH013,CpbHLH043,CpbHLH057,CpbHLH024…
GO:0009791	P	post-embryonic development	9	54	// AT5G53210.1 // AT3G26744.1 // AT4G36930.1 // AT1G59640.2 // AT4G34530.1 // AT3G50330.1 // AT2G20180.2 // AT3G24140.1 // AT1G09530.1	evm.model.supercontig_3.51,evm.model.supercontig_70.77,evm.model.supercontig_21.176,evm.model.supercontig_5.303,evm.model.supercontig_62.160,evm.model.supercontig_55.142,evm.model.supercontig_8.199,evm.model.supercontig_59.132,evm.model.supercontig_65.63,	CpbHLH010,CpbHLH062,CpbHLH060,CpbHLH051,CpbHLH017,CpbHLH008,CpbHLH020,CpbHLH002,CpbHLH037,
GO:0007275	P	multicellular organismal development	12	54	// AT5G53210.1 // AT4G09820.1 // AT5G41315.1 // AT3G26744.1 // AT4G36930.1 // AT1G49770.1 // AT1G59640.2 // AT4G34530.1 // AT3G50330.1 // AT2G20180.2 // AT3G24140.1 // AT1G09530.1	evm.model.supercontig_3.51,evm.model.supercontig_52.26,evm.model.supercontig_537.2,evm.model.supercontig_70.77,evm.model.supercontig_21.176,evm.model.supercontig_21.177,evm.model.supercontig_5.303,evm.model.supercontig_62.160,evm.model.supercontig_55.142,evm.model.supercontig_8.199,evm.model.supercontig_59.132,evm.model.supercontig_65.63,	CpbHLH010,CpbHLH068,CpbHLH065,CpbHLH062,CpbHLH060,CpbHLH059,CpbHLH051,CpbHLH017,CpbHLH008,CpbHLH020,CpbHLH002,CpbHLH037,
GO:0032501	P	multicellular organismal process	12	54	// AT5G53210.1 // AT4G09820.1 // AT5G41315.1 // AT3G26744.1 // AT4G36930.1 // AT1G49770.1 // AT1G59640.2 // AT4G34530.1 // AT3G50330.1 // AT2G20180.2 // AT3G24140.1 // AT1G09530.1	evm.model.supercontig_3.51,evm.model.supercontig_52.26,evm.model.supercontig_537.2,evm.model.supercontig_70.77,evm.model.supercontig_21.176,evm.model.supercontig_21.177,evm.model.supercontig_5.303,evm.model.supercontig_62.160,evm.model.supercontig_55.142,evm.model.supercontig_8.199,evm.model.supercontig_59.132,evm.model.supercontig_65.63,	CpbHLH010,CpbHLH068,CpbHLH065,CpbHLH062,CpbHLH060,CpbHLH059,CpbHLH051,CpbHLH017,CpbHLH008,CpbHLH020,CpbHLH002,CpbHLH037,
GO:0032502	P	developmental process	12	54	// AT5G53210.1 // AT4G09820.1 // AT5G41315.1 // AT3G26744.1 // AT4G36930.1 // AT1G49770.1 // AT1G59640.2 // AT4G34530.1 // AT3G50330.1 // AT2G20180.2 // AT3G24140.1 // AT1G09530.1	evm.model.supercontig_3.51,evm.model.supercontig_52.26,evm.model.supercontig_537.2,evm.model.supercontig_70.77,evm.model.supercontig_21.176,evm.model.supercontig_21.177,evm.model.supercontig_5.303,evm.model.supercontig_62.160,evm.model.supercontig_55.142,evm.model.supercontig_8.199,evm.model.supercontig_59.132,evm.model.supercontig_65.63,	CpbHLH010,CpbHLH068,CpbHLH065,CpbHLH062,CpbHLH060,CpbHLH059,CpbHLH051,CpbHLH017,CpbHLH008,CpbHLH020,CpbHLH002,CpbHLH037,
GO:0048518	P	positive regulation of biological process	5	54	// AT3G26744.1 // AT3G24140.1 // AT1G32640.1 // AT1G09530.1 // AT4G34530.1	evm.model.supercontig_70.77,evm.model.supercontig_59.132,evm.model.supercontig_71.72,evm.model.supercontig_65.63,evm.model.supercontig_62.160,	CpbHLH062,CpbHLH002,CpbHLH070,CpbHLH037,CpbHLH017,
GO:0048869	P	cellular developmental process	4	54	// AT4G09820.1 // AT5G41315.1 // AT3G26744.1 // AT3G24140.1	evm.model.supercontig_52.26,evm.model.supercontig_537.2,evm.model.supercontig_70.77,evm.model.supercontig_59.132,	CpbHLH068,CpbHLH065,CpbHLH062,CpbHLH002,
GO:0030154	P	cell differentiation	3	54	// AT4G09820.1 // AT5G41315.1 // AT3G24140.1	evm.model.supercontig_52.26,evm.model.supercontig_537.2,evm.model.supercontig_59.132,	CpbHLH068,CpbHLH065,CpbHLH002,
GO:0009888	P	tissue development	4	54	// AT3G50330.1 // AT4G09820.1 // AT5G41315.1 // AT3G24140.1	evm.model.supercontig_55.142,evm.model.supercontig_52.26,evm.model.supercontig_537.2,evm.model.supercontig_59.132,	CpbHLH008,CpbHLH068,CpbHLH065,CpbHLH002,
GO:0050793	P	regulation of developmental process	4	54	// AT2G20180.2 // AT3G24140.1 // AT4G36930.1// AT4G34530.1	evm.model.supercontig_8.199,evm.model.supercontig_59.132,evm.model.supercontig_21.176,evm.model.supercontig_62.160,	CpbHLH020,CpbHLH002,CpbHLH060,CpbHLH017,
GO:0048513	P	organ development	6	54	// AT4G09820.1 // AT5G41315.1 // AT4G36930.1 // AT1G59640.2 // AT3G50330.1 // AT3G24140.1	evm.model.supercontig_52.26,evm.model.supercontig_537.2,evm.model.supercontig_21.176,evm.model.supercontig_5.303,evm.model.supercontig_55.142,evm.model.supercontig_59.132,	CpbHLH068,CpbHLH065,CpbHLH060,CpbHLH051,CpbHLH008,CpbHLH002,
GO:0048731	P	system development	6	54	// AT4G09820.1 // AT5G41315.1 // AT4G36930.1 // AT1G59640.2 // AT3G50330.1 // AT3G24140.1	evm.model.supercontig_52.26,evm.model.supercontig_537.2,evm.model.supercontig_21.176,evm.model.supercontig_5.303,evm.model.supercontig_55.142,evm.model.supercontig_59.132,	CpbHLH068,CpbHLH065,CpbHLH060,CpbHLH051,CpbHLH008,CpbHLH002,
GO:0009653	P	anatomical structure morphogenesis	5	54	// AT4G09820.1 // AT5G41315.1 // AT1G59640.2 // AT3G50330.1 // AT3G24140.1	evm.model.supercontig_52.26,evm.model.supercontig_537.2,evm.model.supercontig_5.303evm.model.supercontig_55.142,evm.model.supercontig_59.132,	CpbHLH068,CpbHLH065,CpbHLH051,CpbHLH008,CpbHLH002,
GO:0048856	P	anatomical structure development	9	54	// AT5G53210.1 // AT4G09820.1 // AT5G41315.1 // AT3G26744.1 // AT4G36930.1 // AT1G59640.2 // AT4G34530.1 // AT3G50330.1 // AT3G24140.1	evm.model.supercontig_3.51,evm.model.supercontig_52.26,evm.model.supercontig_537.2,evm.model.supercontig_70.77,evm.model.supercontig_21.176,evm.model.supercontig_5.303,evm.model.supercontig_62.160,evm.model.supercontig_55.142,evm.model.supercontig_59.132,	CpbHLH010,CpbHLH068,CpbHLH065,CpbHLH062,CpbHLH060,CpbHLH051,CpbHLH017,CpbHLH008,CpbHLH002,
GO:0009416	P	response to light stimulus	4	54	// AT2G20180.2 // AT2G46970.1 // AT4G36930.1 // AT1G09530.1	evm.model.supercontig_8.199,evm.model.supercontig_57.28,evm.model.supercontig_21.176,evm.model.supercontig_65.63,	CpbHLH020,CpbHLH014,CpbHLH060,CpbHLH037,
GO:0009314	P	response to radiation	4	54	// AT2G20180.2 // AT2G46970.1 // AT4G36930.1 // AT1G09530.1	evm.model.supercontig_8.199,evm.model.supercontig_57.28,evm.model.supercontig_21.176,evm.model.supercontig_65.63,	CpbHLH020,CpbHLH014,CpbHLH060,CpbHLH037,
GO:0009628	P	response to abiotic stimulus	6	54	// AT3G26744.1 // AT4G36930.1// AT1G32640.1 // AT2G20180.2 // AT2G46970.1 // AT1G09530.1	evm.model.supercontig_70.77,evm.model.supercontig_21.176,evm.model.supercontig_71.72,evm.model.supercontig_8.199,evm.model.supercontig_57.28,evm.model.supercontig_65.63,	CpbHLH062,CpbHLH060,CpbHLH070,CpbHLH020,CpbHLH014,CpbHLH037,
GO:0022414	P	reproductive process	6	54	// AT4G36930.1 // AT4G00050.1 // AT1G59640.2 // AT4G34530.1 // AT3G50330.1 // AT4G02590.1	evm.model.supercontig_21.176,evm.model.supercontig_212.3,evm.model.supercontig_5.303,evm.model.supercontig_62.160,evm.model.supercontig_55.142,evm.model.supercontig_52.97,	CpbHLH060,CpbHLH063,CpbHLH051,CpbHLH017,CpbHLH008,CpbHLH033,
GO:0009725	P	response to hormone stimulus	4	54	// AT2G20180.2 // AT1G32640.1 // AT1G09530.1 // AT5G50915.1	evm.model.supercontig_8.199,evm.model.supercontig_71.72,evm.model.supercontig_65.63,evm.model.supercontig_4.112,	CpbHLH020,CpbHLH070,CpbHLH037,CpbHLH039,
GO:0010033	P	response to organic substance	4	54	// AT5G50915.1// AT1G32640.1 //AT2G20180.2 // AT1G09530.1	evm.model.supercontig_4.112,evm.model.supercontig_71.72,evm.model.supercontig_8.199,evm.model.supercontig_65.63,	CpbHLH039,CpbHLH070,CpbHLH020,CpbHLH037,
GO:0009719	P	response to endogenous stimulus	4	54	// AT2G20180.2 // AT1G32640.1 // AT1G09530.1 // AT5G50915.1	evm.model.supercontig_8.199,evm.model.supercontig_71.72,evm.model.supercontig_65.63,evm.model.supercontig_4.112,	CpbHLH020,CpbHLH070,CpbHLH037,CpbHLH039,
GO:0042221	P	response to chemical stimulus	5	54	// AT5G50915.1 // AT1G32640.1// AT2G20180.2 // AT1G09530.1 // AT2G28160.1	evm.model.supercontig_4.112,evm.evm.model.supercontig_71.72,evm.model.supercontig_8.199,evm.model.supercontig_65.63,evm.TU.contig_28125.2,	CpbHLH039,CpbHLH070,CpbHLH020,CpbHLH037,CpbHLH028,
GO:0050896	P	response to stimulus	8	54	// AT3G26744.1 // AT5G50915.1 // AT4G36930.1// AT1G32640.1 //AT2G20180.2 // AT2G46970.1 // AT1G09530.1 // AT2G28160.1	evm.model.supercontig_70.77,evm.model.supercontig_4.112,evm.model.supercontig_21.176,evm.model.supercontig_71.72,evm.model.supercontig_8.199,evm.model.supercontig_57.28,evm.model.supercontig_65.63,evm.TU.contig_28125.2,	CpbHLH062,CpbHLH039,CpbHLH060,CpbHLH070,CpbHLH020,CpbHLH014,CpbHLH037,CpbHLH028,
GO:0030528	F	transcription regulator activity	53	54	// AT4G16430.1 // AT1G27740.1 // AT5G50915.1// AT4G33880.1 // AT2G16910.1 // AT3G50330.1 // AT1G72210.1 // AT3G24140.1 // AT1G09530.1 // AT1G25330.1 // AT5G41315.1 // AT5G01310.1 // AT5G56960.1 // AT3G47710.1 // AT1G59640.2 // AT1G10120.1 // AT3G21330.1 // AT2G42280.1 // AT1G32640.1 // AT3G57800.1 // AT4G00870.1 // AT3G19860.2 // AT2G41130.1 // AT3G26744.1 // AT3G22100.1 // AT4G38070.1 // AT1G306…	evm.TU.contig_45808.1,evm.model.supercontig_142.14,evm.model.supercontig_4.112,evm.model.supercontig_106.57,evm.model.supercontig_20.95,evm.model.supercontig_55.142,evm.model.supercontig_55.64,evm.model.supercontig_59.132,evm.model.supercontig_65.63,evm.TU.contig_28125.2,evm.model.supercontig_3.51,evm.model.supercontig_65.44,evm.model.supercontig_537.2,evm.model.supercontig_120.27,evm.model.super…	CpbHLH031,CpbHLH046,CpbHLH039,CpbHLH050,CpbHLH066,CpbHLH008,CpbHLH021,CpbHLH002,CpbHLH037,CpbHLH028,CpbHLH010,CpbHLH038,CpbHLH065,CpbHLH054,CpbHLH051,CpbHLH044,CpbHLH007,CpbHLH053,CpbHLH070,CpbHLH009,CpbHLH071,CpbHLH022,CpbHLH069,CpbHLH062,CpbHLH049,CpbHLH055,CpbHLH015,CpbHLH063,CpbHLH016,CpbHLH033,CpbHLH048,CpbHLH052,CpbHLH059,CpbHLH073,CpbHLH001,CpbHLH029,CpbHLH056,CpbHLH068,CpbHLH041,CpbHLH025…
GO:0003700	F	transcription factor activity	53	54	// AT4G16430.1 // AT1G27740.1 // AT5G50915.1// AT4G33880.1 // AT2G16910.1 // AT3G50330.1 // AT1G72210.1 // AT3G24140.1 // AT1G09530.1 // AT1G25330.1 // AT5G41315.1 // AT5G01310.1 // AT5G56960.1 // AT3G47710.1 // AT1G59640.2 // AT1G10120.1 // AT3G21330.1 // AT2G42280.1 // AT1G32640.1 // AT3G57800.1 // AT4G00870.1 // AT3G19860.2 // AT2G41130.1 // AT3G26744.1 // AT3G22100.1 // AT4G38070.1 // AT1G306…	evm.TU.contig_45808.1,evm.model.supercontig_142.14,evm.model.supercontig_4.112,evm.model.supercontig_106.57,evm.model.supercontig_20.95,evm.model.supercontig_55.142,evm.model.supercontig_55.64,evm.model.supercontig_59.132,evm.model.supercontig_65.63,evm.TU.contig_28125.2,evm.model.supercontig_3.51,evm.model.supercontig_65.44,evm.model.supercontig_537.2,evm.model.supercontig_120.27,evm.model.super…	CpbHLH031,CpbHLH046,CpbHLH039,CpbHLH050,CpbHLH066,CpbHLH008,CpbHLH021,CpbHLH002,CpbHLH037,CpbHLH028,CpbHLH010,CpbHLH038,CpbHLH065,CpbHLH054,CpbHLH051,CpbHLH044,CpbHLH007,CpbHLH053,CpbHLH070,CpbHLH009,CpbHLH071,CpbHLH022,CpbHLH069,CpbHLH062,CpbHLH049,CpbHLH055,CpbHLH015,CpbHLH063,CpbHLH016,CpbHLH033,CpbHLH048,CpbHLH052,CpbHLH059,CpbHLH073,CpbHLH001,CpbHLH029,CpbHLH056,CpbHLH068,CpbHLH041,CpbHLH025…
GO:0003677	F	DNA binding	53	54	// AT4G16430.1 // AT1G27740.1 // AT5G50915.1// AT4G33880.1 // AT2G16910.1 // AT3G50330.1 // AT1G72210.1 // AT3G24140.1 // AT1G09530.1 // AT1G25330.1 // AT5G41315.1 // AT5G01310.1 // AT5G56960.1 // AT3G47710.1 // AT1G59640.2 // AT1G10120.1 // AT3G21330.1 // AT2G42280.1 // AT1G32640.1 // AT3G57800.1 // AT4G00870.1 // AT3G19860.2 // AT2G41130.1 // AT3G26744.1 // AT3G22100.1 // AT4G38070.1 // AT1G306…	evm.TU.contig_45808.1,evm.model.supercontig_142.14,evm.model.supercontig_4.112,evm.model.supercontig_58.45,evm.model.supercontig_106.57,evm.modeevm.TU.contig_45808.1,evm.model.supercontig_142.14,evm.model.supercontig_4.112,evm.model.supercontig_106.57,evm.model.supercontig_20.95,evm.model.supercontig_55.142,evm.model.supercontig_55.64,evm.model.supercontig_59.132,evm.model.supercontig_65.63,evm.T…	CpbHLH031,CpbHLH046,CpbHLH039,CpbHLH050,CpbHLH066,CpbHLH008,CpbHLH021,CpbHLH002,CpbHLH037,CpbHLH028,CpbHLH010,CpbHLH038,CpbHLH065,CpbHLH054,CpbHLH051,CpbHLH044,CpbHLH007,CpbHLH053,CpbHLH070,CpbHLH009,CpbHLH071,CpbHLH022,CpbHLH069,CpbHLH062,CpbHLH049,CpbHLH055,CpbHLH015,CpbHLH063,CpbHLH016,CpbHLH033,CpbHLH048,CpbHLH052,CpbHLH059,CpbHLH073,CpbHLH001,CpbHLH029,CpbHLH056,CpbHLH068,CpbHLH041,CpbHLH025…
GO:0003676	F	nucleic acid binding	53	54	// AT4G16430.1 // AT1G27740.1 // AT5G50915.1// AT4G33880.1 // AT2G16910.1 // AT3G50330.1 // AT1G72210.1 // AT3G24140.1 // AT1G09530.1 // AT1G25330.1 // AT5G41315.1 // AT5G01310.1 // AT5G56960.1 // AT3G47710.1 // AT1G59640.2 // AT1G10120.1 // AT3G21330.1 // AT2G42280.1 // AT1G32640.1 // AT3G57800.1 // AT4G00870.1 // AT3G19860.2 // AT2G41130.1 // AT3G26744.1 // AT3G22100.1 // AT4G38070.1 // AT1G306…	evm.TU.contig_45808.1,evm.model.supercontig_142.14,evm.model.supercontig_4.112,evm.model.supercontig_58.45,evm.model.supercontig_106.57,evm.modeevm.TU.contig_45808.1,evm.model.supercontig_142.14,evm.model.supercontig_4.112,evm.model.supercontig_106.57,evm.model.supercontig_20.95,evm.model.supercontig_55.142,evm.model.supercontig_55.64,evm.model.supercontig_59.132,evm.model.supercontig_65.63,evm.T…	CpbHLH031,CpbHLH046,CpbHLH039,CpbHLH050,CpbHLH066,CpbHLH008,CpbHLH021,CpbHLH002,CpbHLH037,CpbHLH028,CpbHLH010,CpbHLH038,CpbHLH065,CpbHLH054,CpbHLH051,CpbHLH044,CpbHLH007,CpbHLH053,CpbHLH070,CpbHLH009,CpbHLH071,CpbHLH022,CpbHLH069,CpbHLH062,CpbHLH049,CpbHLH055,CpbHLH015,CpbHLH063,CpbHLH016,CpbHLH033,CpbHLH048,CpbHLH052,CpbHLH059,CpbHLH073,CpbHLH001,CpbHLH029,CpbHLH056,CpbHLH068,CpbHLH041,CpbHLH025…
GO:0047627	F	adenylylsufatase activity	1	54	//AT5G01310.1	evm.model.supercontig_120.27	CpbHLH054
GO:0010313	F	phytochrome binding	1	54	//AT2G20180.2	evm.model.supercontig_8.199	CpbHLH020
GO:0005488	F	binding	53	54	// AT4G16430.1 // AT1G27740.1 // AT5G50915.1// AT4G33880.1 // AT2G16910.1 // AT3G50330.1 // AT1G72210.1 // AT3G24140.1 // AT1G09530.1 // AT1G25330.1 // AT5G41315.1 // AT5G01310.1 // AT5G56960.1 // AT3G47710.1 // AT1G59640.2 // AT1G10120.1 // AT3G21330.1 // AT2G42280.1 // AT1G32640.1 // AT3G57800.1 // AT4G00870.1 // AT3G19860.2 // AT2G41130.1 // AT3G26744.1 // AT3G22100.1 // AT4G38070.1 // AT1G306…	evm.TU.contig_45808.1,evm.model.supercontig_142.14,evm.model.supercontig_4.112,evm.model.supercontig_106.57,evm.model.supercontig_20.95,evm.model.supercontig_55.142,evm.model.supercontig_55.64,evm.model.supercontig_59.132,evm.model.supercontig_65.63,evm.TU.contig_28125.2,evm.model.supercontig_3.51,evm.model.supercontig_65.44,evm.model.supercontig_537.2,evm.model.supercontig_120.27,evm.model.super…	CpbHLH031,CpbHLH046,CpbHLH039,CpbHLH050,CpbHLH066,CpbHLH008,CpbHLH021,CpbHLH002,CpbHLH037,CpbHLH028,CpbHLH010,CpbHLH038,CpbHLH065,CpbHLH054,CpbHLH051,CpbHLH044,CpbHLH007,CpbHLH053,CpbHLH070,CpbHLH009,CpbHLH071,CpbHLH022,CpbHLH069,CpbHLH062,CpbHLH049,CpbHLH055,CpbHLH015,CpbHLH063,CpbHLH016,CpbHLH033,CpbHLH048,CpbHLH052,CpbHLH059,CpbHLH073,CpbHLH001,CpbHLH029,CpbHLH056,CpbHLH068,CpbHLH041,CpbHLH025…
GO:0005634	C	nucleus	37	54	// AT4G16430.1 // AT1G27740.1 // AT5G50915.1 // AT4G33880.1 //AT1G68920.1 // AT1G72210.1 // AT3G24140.1 // AT2G42280.1 // AT5G53210.1 // AT1G25330.1 // AT5G41315.1 // AT1G10120.1 // AT1G09530.1 // AT3G22100.1 // AT3G57800.1 // AT4G00870.1 // AT3G19860.2 // AT3G26744.1 // AT5G48560.1 // AT5G01310.1 // AT1G30670.1 // AT3G61950.1 // AT4G14410.1 // AT1G10610.1 // AT5G58010.1 // AT3G21330.1 // AT1G511…	evm.TU.contig_45808.1,evm.model.supercontig_142.14,evm.model.supercontig_4.112,evm.model.supercontig_106.57,evm.model.supercontig_1.175,evm.model.supercontig_55.64,evm.model.supercontig_59.132,evm.TU.contig_45766.1,evm.model.supercontig_3.51,evm.model.supercontig_65.44,evm.model.supercontig_537.2,evm.model.supercontig_160.32,evm.model.supercontig_65.63,evm.model.supercontig_8.253,evm.model.superc…	CpbHLH031,CpbHLH046,CpbHLH039,CpbHLH050,CpbHLH029,CpbHLH021,CpbHLH002,CpbHLH053,CpbHLH010,CpbHLH038,CpbHLH065,CpbHLH044,CpbHLH037,CpbHLH049,CpbHLH009,CpbHLH071,CpbHLH022,CpbHLH062,CpbHLH012,CpbHLH054,CpbHLH015,CpbHLH016,CpbHLH048,CpbHLH073,CpbHLH001,CpbHLH007,CpbHLH041,CpbHLH052,CpbHLH013,CpbHLH043,CpbHLH057,CpbHLH024,CpbHLH060,CpbHLH023,CpbHLH017,CpbHLH030,CpbHLH020,
GO:0043227	C	membrane-bounded organelle	39	54	// AT4G16430.1 // AT1G27740.1 // AT5G50915.1// AT4G33880.1 //AT1G68920.1 // AT1G72210.1 // AT3G24140.1 // AT2G42280.1 // AT5G53210.1 // AT1G25330.1 // AT5G41315.1 // AT5G01310.1 //AT1G10120.1 // AT1G09530.1 // AT3G22100.1 // AT3G57800.1 //AT4G00870.1 // AT3G19860.2 // AT2G41130.1 // AT3G26744.1 // AT5G48560.1 // AT4G38070.1 // AT1G30670.1 // AT3G61950.1 // AT4G14410.1 // AT1G10610.1 // AT5G58010.…	evm.TU.contig_45808.1,evm.model.supercontig_142.14,evm.model.supercontig_4.112,,evm.model.supercontig_106.57,evm.model.supercontig_1.175,evm.model.supercontig_55.64,evm.model.supercontig_59.132,evm.TU.contig_45766.1,evm.model.supercontig_3.51,evm.model.supercontig_65.44,evm.model.supercontig_537.2,evm.model.supercontig_120.27,evm.model.supercontig_160.32,evm.model.supercontig_65.63,evm.model.supe…	CpbHLH031,CpbHLH046,CpbHLH039,CpbHLH050,CpbHLH029,CpbHLH021,CpbHLH002,CpbHLH053,CpbHLH010,CpbHLH038,CpbHLH065,CpbHLH054,CpbHLH044,CpbHLH037,CpbHLH049,CpbHLH009,CpbHLH071,CpbHLH022,CpbHLH069,CpbHLH062,CpbHLH012,CpbHLH055,CpbHLH015,CpbHLH016,CpbHLH048,CpbHLH073,CpbHLH001,CpbHLH007,CpbHLH041,CpbHLH052,CpbHLH013,CpbHLH043,CpbHLH057,CpbHLH024,CpbHLH060,CpbHLH023,CpbHLH017,CpbHLH030,CpbHLH020,
GO:0043231	C	intracellular membrane-bounded organelle	39	54	// AT4G16430.1 // AT1G27740.1 // AT5G50915.1// AT4G33880.1 //AT1G68920.1 // AT1G72210.1 // AT3G24140.1 // AT2G42280.1 // AT5G53210.1 // AT1G25330.1 // AT5G41315.1 // AT5G01310.1 //AT1G10120.1 // AT1G09530.1 // AT3G22100.1 // AT3G57800.1 //AT4G00870.1 // AT3G19860.2 // AT2G41130.1 // AT3G26744.1 // AT5G48560.1 // AT4G38070.1 // AT1G30670.1 // AT3G61950.1 // AT4G14410.1 // AT1G10610.1 // AT5G58010.…	evm.TU.contig_45808.1,evm.model.supercontig_142.14,evm.model.supercontig_4.112,evm.model.supercontig_58.45,evm.model.supercontig_106.57,evm.modeevm.TU.contig_45808.1,evm.model.supercontig_142.14,evm.model.supercontig_4.112,,evm.model.supercontig_106.57,evm.model.supercontig_1.175,evm.model.supercontig_55.64,evm.model.supercontig_59.132,evm.TU.contig_45766.1,evm.model.supercontig_3.51,evm.model.su…	CpbHLH031,CpbHLH046,CpbHLH039,CpbHLH050,CpbHLH029,CpbHLH021,CpbHLH002,CpbHLH053,CpbHLH010,CpbHLH038,CpbHLH065,CpbHLH054,CpbHLH044,CpbHLH037,CpbHLH049,CpbHLH009,CpbHLH071,CpbHLH022,CpbHLH069,CpbHLH062,CpbHLH012,CpbHLH055,CpbHLH015,CpbHLH016,CpbHLH048,CpbHLH073,CpbHLH001,CpbHLH007,CpbHLH041,CpbHLH052,CpbHLH013,CpbHLH043,CpbHLH057,CpbHLH024,CpbHLH060,CpbHLH023,CpbHLH017,CpbHLH030,CpbHLH020,
GO:0043229	C	intracellular organelle	39	54	// AT4G16430.1 // AT1G27740.1 // AT5G50915.1// AT4G33880.1 //AT1G68920.1 // AT1G72210.1 // AT3G24140.1 // AT2G42280.1 // AT5G53210.1 // AT1G25330.1 // AT5G41315.1 // AT5G01310.1 //AT1G10120.1 // AT1G09530.1 // AT3G22100.1 // AT3G57800.1 //AT4G00870.1 // AT3G19860.2 // AT2G41130.1 // AT3G26744.1 // AT5G48560.1 // AT4G38070.1 // AT1G30670.1 // AT3G61950.1 // AT4G14410.1 // AT1G10610.1 // AT5G58010.…	evm.TU.contig_45808.1,evm.model.supercontig_142.14,evm.model.supercontig_4.112,evm.model.supercontig_58.45,evm.model.supercontig_106.57,evm.modeevm.TU.contig_45808.1,evm.model.supercontig_142.14,evm.model.supercontig_4.112,,evm.model.supercontig_106.57,evm.model.supercontig_1.175,evm.model.supercontig_55.64,evm.model.supercontig_59.132,evm.TU.contig_45766.1,evm.model.supercontig_3.51,evm.model.su…	CpbHLH031,CpbHLH046,CpbHLH039,CpbHLH050,CpbHLH029,CpbHLH021,CpbHLH002,CpbHLH053,CpbHLH010,CpbHLH038,CpbHLH065,CpbHLH054,CpbHLH044,CpbHLH037,CpbHLH049,CpbHLH009,CpbHLH071,CpbHLH022,CpbHLH069,CpbHLH062,CpbHLH012,CpbHLH055,CpbHLH015,CpbHLH016,CpbHLH048,CpbHLH073,CpbHLH001,CpbHLH007,CpbHLH041,CpbHLH052,CpbHLH013,CpbHLH043,CpbHLH057,CpbHLH024,CpbHLH060,CpbHLH023,CpbHLH017,CpbHLH030,CpbHLH020,
GO:0043226	C	organelle	39	54	// AT4G16430.1 // AT1G27740.1 // AT5G50915.1// AT4G33880.1 //AT1G68920.1 // AT1G72210.1 // AT3G24140.1 // AT2G42280.1 // AT5G53210.1 // AT1G25330.1 // AT5G41315.1 // AT5G01310.1 //AT1G10120.1 // AT1G09530.1 // AT3G22100.1 // AT3G57800.1 //AT4G00870.1 // AT3G19860.2 // AT2G41130.1 // AT3G26744.1 // AT5G48560.1 // AT4G38070.1 // AT1G30670.1 // AT3G61950.1 // AT4G14410.1 // AT1G10610.1 // AT5G58010.…	evm.TU.contig_45808.1,evm.model.supercontig_142.14,evm.model.supercontig_4.112,evm.model.supercontig_58.45,evm.model.supercontig_106.57,evm.modeevm.TU.contig_45808.1,evm.model.supercontig_142.14,evm.model.supercontig_4.112,,evm.model.supercontig_106.57,evm.model.supercontig_1.175,evm.model.supercontig_55.64,evm.model.supercontig_59.132,evm.TU.contig_45766.1,evm.model.supercontig_3.51,evm.model.su…	CpbHLH031,CpbHLH046,CpbHLH039,CpbHLH050,CpbHLH029,CpbHLH021,CpbHLH002,CpbHLH053,CpbHLH010,CpbHLH038,CpbHLH065,CpbHLH054,CpbHLH044,CpbHLH037,CpbHLH049,CpbHLH009,CpbHLH071,CpbHLH022,CpbHLH069,CpbHLH062,CpbHLH012,CpbHLH055,CpbHLH015,CpbHLH016,CpbHLH048,CpbHLH073,CpbHLH001,CpbHLH007,CpbHLH041,CpbHLH052,CpbHLH013,CpbHLH043,CpbHLH057,CpbHLH024,CpbHLH060,CpbHLH023,CpbHLH017,CpbHLH030,CpbHLH020,
GO:0044424	C	intracellular part	39	54	// AT4G16430.1 // AT1G27740.1 // AT5G50915.1// AT4G33880.1 //AT1G68920.1 // AT1G72210.1 // AT3G24140.1 // AT2G42280.1 // AT5G53210.1 // AT1G25330.1 // AT5G41315.1 // AT5G01310.1 //AT1G10120.1 // AT1G09530.1 // AT3G22100.1 // AT3G57800.1 //AT4G00870.1 // AT3G19860.2 // AT2G41130.1 // AT3G26744.1 // AT5G48560.1 // AT4G38070.1 // AT1G30670.1 // AT3G61950.1 // AT4G14410.1 // AT1G10610.1 // AT5G58010.…	evm.TU.contig_45808.1,evm.model.supercontig_142.14,evm.model.supercontig_4.112,evm.model.supercontig_58.45,evm.model.supercontig_106.57,evm.modeevm.TU.contig_45808.1,evm.model.supercontig_142.14,evm.model.supercontig_4.112,,evm.model.supercontig_106.57,evm.model.supercontig_1.175,evm.model.supercontig_55.64,evm.model.supercontig_59.132,evm.TU.contig_45766.1,evm.model.supercontig_3.51,evm.model.su…	CpbHLH031,CpbHLH046,CpbHLH039,CpbHLH050,CpbHLH029,CpbHLH021,CpbHLH002,CpbHLH053,CpbHLH010,CpbHLH038,CpbHLH065,CpbHLH054,CpbHLH044,CpbHLH037,CpbHLH049,CpbHLH009,CpbHLH071,CpbHLH022,CpbHLH069,CpbHLH062,CpbHLH012,CpbHLH055,CpbHLH015,CpbHLH016,CpbHLH048,CpbHLH073,CpbHLH001,CpbHLH007,CpbHLH041,CpbHLH052,CpbHLH013,CpbHLH043,CpbHLH057,CpbHLH024,CpbHLH060,CpbHLH023,CpbHLH017,CpbHLH030,CpbHLH020,
GO:0005622	C	intracellular	39	54	// AT4G16430.1 // AT1G27740.1 // AT5G50915.1// AT4G33880.1 //AT1G68920.1 // AT1G72210.1 // AT3G24140.1 // AT2G42280.1 // AT5G53210.1 // AT1G25330.1 // AT5G41315.1 // AT5G01310.1 //AT1G10120.1 // AT1G09530.1 // AT3G22100.1 // AT3G57800.1 //AT4G00870.1 // AT3G19860.2 // AT2G41130.1 // AT3G26744.1 // AT5G48560.1 // AT4G38070.1 // AT1G30670.1 // AT3G61950.1 // AT4G14410.1 // AT1G10610.1 // AT5G58010.…	evm.TU.contig_45808.1,evm.model.supercontig_142.14,evm.model.supercontig_4.112,evm.model.supercontig_58.45,evm.model.supercontig_106.57,evm.modeevm.TU.contig_45808.1,evm.model.supercontig_142.14,evm.model.supercontig_4.112,,evm.model.supercontig_106.57,evm.model.supercontig_1.175,evm.model.supercontig_55.64,evm.model.supercontig_59.132,evm.TU.contig_45766.1,evm.model.supercontig_3.51,evm.model.su…	CpbHLH031,CpbHLH046,CpbHLH039,CpbHLH050,CpbHLH029,CpbHLH021,CpbHLH002,CpbHLH053,CpbHLH010,CpbHLH038,CpbHLH065,CpbHLH054,CpbHLH044,CpbHLH037,CpbHLH049,CpbHLH009,CpbHLH071,CpbHLH022,CpbHLH069,CpbHLH062,CpbHLH012,CpbHLH055,CpbHLH015,CpbHLH016,CpbHLH048,CpbHLH073,CpbHLH001,CpbHLH007,CpbHLH041,CpbHLH052,CpbHLH013,CpbHLH043,CpbHLH057,CpbHLH024,CpbHLH060,CpbHLH023,CpbHLH017,CpbHLH030,CpbHLH020,
GO:0005623	C	cell	39	54	// AT4G16430.1 // AT1G27740.1 // AT5G50915.1// AT4G33880.1 //AT1G68920.1 // AT1G72210.1 // AT3G24140.1 // AT2G42280.1 // AT5G53210.1 // AT1G25330.1 // AT5G41315.1 // AT5G01310.1 //AT1G10120.1 // AT1G09530.1 // AT3G22100.1 // AT3G57800.1 //AT4G00870.1 // AT3G19860.2 // AT2G41130.1 // AT3G26744.1 // AT5G48560.1 // AT4G38070.1 // AT1G30670.1 // AT3G61950.1 // AT4G14410.1 // AT1G10610.1 // AT5G58010.…	evm.TU.contig_45808.1,evm.model.supercontig_142.14,evm.model.supercontig_4.112,evm.model.supercontig_58.45,evm.model.supercontig_106.57,evm.modeevm.TU.contig_45808.1,evm.model.supercontig_142.14,evm.model.supercontig_4.112,,evm.model.supercontig_106.57,evm.model.supercontig_1.175,evm.model.supercontig_55.64,evm.model.supercontig_59.132,evm.TU.contig_45766.1,evm.model.supercontig_3.51,evm.model.su…	CpbHLH031,CpbHLH046,CpbHLH039,CpbHLH050,CpbHLH029,CpbHLH021,CpbHLH002,CpbHLH053,CpbHLH010,CpbHLH038,CpbHLH065,CpbHLH054,CpbHLH044,CpbHLH037,CpbHLH049,CpbHLH009,CpbHLH071,CpbHLH022,CpbHLH069,CpbHLH062,CpbHLH012,CpbHLH055,CpbHLH015,CpbHLH016,CpbHLH048,CpbHLH073,CpbHLH001,CpbHLH007,CpbHLH041,CpbHLH052,CpbHLH013,CpbHLH043,CpbHLH057,CpbHLH024,CpbHLH060,CpbHLH023,CpbHLH017,CpbHLH030,CpbHLH020,
GO:0044464	C	cell part	39	54	// AT4G16430.1 // AT1G27740.1 // AT5G50915.1// AT4G33880.1 //AT1G68920.1 // AT1G72210.1 // AT3G24140.1 // AT2G42280.1 // AT5G53210.1 // AT1G25330.1 // AT5G41315.1 // AT5G01310.1 //AT1G10120.1 // AT1G09530.1 // AT3G22100.1 // AT3G57800.1 //AT4G00870.1 // AT3G19860.2 // AT2G41130.1 // AT3G26744.1 // AT5G48560.1 // AT4G38070.1 // AT1G30670.1 // AT3G61950.1 // AT4G14410.1 // AT1G10610.1 // AT5G58010.…	evm.TU.contig_45808.1,evm.model.supercontig_142.14,evm.model.supercontig_4.112,evm.model.supercontig_58.45,evm.model.supercontig_106.57,evm.modeevm.TU.contig_45808.1,evm.model.supercontig_142.14,evm.model.supercontig_4.112,,evm.model.supercontig_106.57,evm.model.supercontig_1.175,evm.model.supercontig_55.64,evm.model.supercontig_59.132,evm.TU.contig_45766.1,evm.model.supercontig_3.51,evm.model.su…	CpbHLH031,CpbHLH046,CpbHLH039,CpbHLH050,CpbHLH029,CpbHLH021,CpbHLH002,CpbHLH053,CpbHLH010,CpbHLH038,CpbHLH065,CpbHLH054,CpbHLH044,CpbHLH037,CpbHLH049,CpbHLH009,CpbHLH071,CpbHLH022,CpbHLH069,CpbHLH062,CpbHLH012,CpbHLH055,CpbHLH015,CpbHLH016,CpbHLH048,CpbHLH073,CpbHLH001,CpbHLH007,CpbHLH041,CpbHLH052,CpbHLH013,CpbHLH043,CpbHLH057,CpbHLH024,CpbHLH060,CpbHLH023,CpbHLH017,CpbHLH030,CpbHLH020,
GO:0009536	C	plastid	4	54	// AT2G41130.1 // AT5G62610.1 // AT3G07340.1 // AT5G01310.1	evm.model.supercontig_92.83,evm.model.supercontig_203.5,evm.model.supercontig_8.103,evm.model.supercontig_120.27,	CpbHLH069,CpbHLH013,CpbHLH043,CpbHLH054,
GO:0005737	C	cytoplasm	5	54	// AT2G41130.1 // AT5G62610.1 // AT3G07340.1 // AT4G38070.1 // AT5G01310.1	evm.model.supercontig_92.83,evm.model.supercontig_203.5,evm.model.supercontig_8.103,evm.model.supercontig_55.51,evm.model.supercontig_120.27,	CpbHLH069,CpbHLH013,CpbHLH043,CpbHLH055,CpbHLH054,
GO:0009507	C	chloroplast	4	54	// AT2G41130.1 // AT5G62610.1 // AT3G07340.1 // AT5G01310.1	evm.model.supercontig_92.83,evm.model.supercontig_203.5,evm.model.supercontig_8.103,evm.model.supercontig_120.27,	CpbHLH069,CpbHLH013,CpbHLH043,CpbHLH054,
GO:0044444	C	cytoplasmic part	5	54	// AT2G41130.1 // AT5G62610.1 // AT3G07340.1 // AT4G38070.1 // AT5G01310.1	evm.model.supercontig_92.83,evm.model.supercontig_203.5,evm.model.supercontig_8.103,evm.model.supercontig_55.51,evm.model.supercontig_120.27,	CpbHLH069,CpbHLH013,CpbHLH043,CpbHLH055,CpbHLH054,
GO:0005739	C	mitochondrion	1	54	//AT4G38070.1	evm.model.supercontig_55.51	CpbHLH055
GO:0009506	C	plasmodesma	2	54	// AT4G00050.1	evm.model.supercontig_1213.3,evm.model.supercontig_212.3	CpbHLH072,CpbHLH063
