# Supplementary material for: Genome-wide analysis of basic helix-loop-helix transcription factors in papaya (Carica papaya L.)
Source: PeerJ. 2020 Jul 3;8:e9319. doi: 10.7717/peerj.9319 (PMC7341539; doi:10.7717/peerj.9319)
Supplement: Supplemental Information 7 [file peerj-08-9319-s007.xlsx]

## Sheet: Sheet1
Protein_id	Amino acid sequence
evm.model.supercontig_12.1	MADEFNTSTNWWDSSRNRFDSGSSSSSSGINSLGGSFGWPTEMVDIKARSSMDSVSVSGSSVVFQDTQKLQGSDSGGDHLHMMGLGLSSPAMDWNQALLRGDKAEPSFRSLLQDSNSTTPYHQQEIGHMGSSSTTTSSQVQWREKMFAGGVSSGDSSSANEFKQLNRGFSLDQSQFSPHGSSSDSTVTCQGLPSSFQIDNSAGIYGSQASSILQGLLGSDNQPPPQPQPSSFENRALNYNQYTNYAMNPNELMANSWPKIPQFLRNSPPKQPSHSHLHFSNNAPFWNAPATAMNDVRSSFFPSLQPQFSNPNFEEKPKNISEVRESSSVVKKNGSESSNPASNKRARSETASPLPAFKVRKEKMGDRITALQQLVSPFGKTDTASVLSEAIEYIKFLHE…
evm.model.supercontig_124.41	MKKRSSDSSKLDRKTVERNRRIHMKSLCFKLSSLIPSQHFKACDKEHLSQQEQLEHAATYIKELRERIEELKGRKEEAIMEESGRGKYRSNINDGGLSLPMVELRDMGSSIEVNVISGLNKNFMSYQVIRILQEEGADVVSASFNTVGDKIFHTFHAQVKITRVGVETSRVSQRLEEMICLGSANI
evm.model.supercontig_14.15	MSSRRSRSQAATSSRITDDQIVELVSKLRQLLPEIRDRRSDKVSASKVLQETCNYIRSLHREVDDLSERLSQLLATIDADSAEASIIRSLIM
evm.model.supercontig_175.4	MSEAEMGSVLKQALKRLCCSNGWLLTFEDAYYEDQMGTVVNHMLLQVHMLGKGIIGQAALAGSHSWVFFDTHGEQSNSIGSVTNQDIFQEETSTEFHHQFSSGIKTIVTISVGSRGVVQFGSTQKIIGQEKLLLIMVLESLEFLDQTKRMLQGMESIDGLIPLEHASSSSDFYDLDGLFATLIASENSSSGNLVQVYGGSSTELIGNAACLSASPSQSSFTSDFFIGNMTPIHGDSCHVFNQLQTDVPEAQGELSSKPNTKIQSFGLPTSSVNNSVDNVPSNSAWSDDSILAAFEPISLPEKGMQDLPGVFVAKTDTLVSRGSAIKSCLGESNVSLKYQYRSGKLTPDQNCPLERAIDHPNISEKFKEADLLADISSAFAVDDLTQWFALSPEYDIDKI…
evm.model.supercontig_183.32	MSSRRSRSRQSSSSRISDDQITELITKLQQLIPELRHRRSDKLSASKVLQETCNYIRNLHREVDDLSDRLSALLASTDSDSPEAAIIRSLLM
evm.model.supercontig_19.98	MVSREHKRAVLNEKLQTLRSITNSHAVNKTSIIVDASKYIKELKQKVERLNQDIAATCTQTSTDQNPLPGIHVTVETLEKGFLINVCCGRSCPGLLVSILEAFEDLGLNVLEARVSCTESFRLQAVGGEDGEDEASESIDAQVVKQVVLQAIKNWGGPAHQG
evm.model.supercontig_23.65	MNRGVLQSSPVQQMMAGNPNWWNMNGVRPMVIPPLTSTHQQPPSPFLPPPPTLFPHHYTLNPSSSSSSSSVFPLPSWHGSPDQLPESWSQLLLGGLVGEEEKAAMGHFQAKKLESWEEQVLHQPPNGGGVVEVKQENSASSFVYGHANEDFQAKPTWSHHHQVMPVSSPKSCVTTFSSNMLDFSTNNKSDGRHPPPDRSSECNSPASGGAVKKARVQASSSQPTFKVRKEKLGDRITALHQLVSPFGKTDTASVLLEAIGYIRFLQSQIEALSLPYLGSASSNIRHQQSVQGERNCVFPEDPGQLLNDNCMKRKAGAAEQDGHEEPKKDLRSRGLCLVPVSCTLQVGSDNGADYWAPALGGGFR
evm.model.supercontig_27.162	MGEEFHAGVCGETWWNSSKNVFASPCSVGIGGDLMGGSTNFFWSSFDVLDMKAKSSYEEEDVANITTAVTDTSTNTKNSSSVSADGVFHVQKLQEAAADSDSTLQMMGFGISSSSPSTSDWNQSILGRLSSSESNYSSMMPEDMNSISRLQQSYSESSINENIFKPVYLHQDFSSSSSSSSSASYGFPNSTLLQTLFESAPTHDDPPPPPPPHHHHHHQLLNNRSMNYMSTYTNCNSQDQLSPSNWSKTVSPLLKPSLPKQQFWNSSSSSFPAPLNDIIRPRLSPSSQSQFLVPCFQEKSNCSKLTPKLSTGEIRDSGSAMKKASSELPVSKRPRIETPSPLPTFKVRKEKLGDRITALQQLVSPFGKTDTASVLHEAIEYIKFLHDQVSVLSNPYMKQ…
evm.model.supercontig_27.35	MESNPSSSSRTDRKTIERNRRNQMKVLYSKLNSLLPQETSRDRTSLPDQLQEATSYIKKLQVNVERMKEKKDRLMVGMERLGSAGSSSGNGSNRIDVHVTGSILQVVLVTGLDSQSMFNEILRLIHEEGAEIVNASFSVVDDNTVLHTIHAQVDQSELGHGHHKAARISERLKKFVHDADHGAF
evm.model.supercontig_388.7	MSSRRSRSRQSGGSRISDDQINDLVTKLQQLLPELRDRRSDKVSAAKVLQETCNYIRNLHREVDDLSERLSELLATTDTAQAAIIRSLLMQ
evm.model.supercontig_4.179	MFPLQQSNELCFRISSSPHHQHKIPQDLILSCALTDGMSDMIAVDNNLGKSRRRKVCGMASTKTTERHDLHHPQEFGTDNHESNNKKKMHHRDIERQRRQEMATLYASLRSLLPLDFIKGKRAISDHMNEAVNYIKHLQKNIKELSVKRNRLKQFDSSTAGSINSNSDSSSSMIVNQSLVGVEIMFSSGFWAKSLRLSRVLHVILEEGLCVRSCTSARADDKFLHTIQAELFTTQ
evm.model.supercontig_4.181	MDSGGGGFDNNPMMRKSQLKQKSSVNDSSGENYDNDDYKKKMLHRDLERLRRQEMATLYASLRTLLPLEYIKGYRAVSDHMNGAVNYIKDLKQRVEGLRATRDELKKLSESSVGFDSEINSSSSYFSPSCVMVNPCPCGVEVVISTHLRVQGLPLSRALQVILDQGLNVVSCVSTRLNETLVYKMQVEVNELTGFDTCWLQQKLIAEEVRLWNETSK
evm.model.supercontig_50.37	MLEVAYKQLRFTNLSSKPNDLKCREEIKSRPRQKFDLTIVVVAVVPQGVVQLGSLNKVTEDEKLVTHVRDVFYALQDPLVGHVKNLVQQSMKSSVSLSNLPAKTLASEVTDSLWSSAHPKKTVEVACKPAGMEISMSESEEGANLLQPGGKVVNMKCENQVEMNFISSGFYEGETSGWKDLTVRSGHSLNLHSNNSITNDISLCDFALEAEKLKVDRTCFASAILDSAVCDPVKMDGSESYQDGMPSVAKSSNLKFQKDSEECKSLSKLSQLDSANLAFKYSAGWELLEALGPAFQKQSNYVDWEIDKAESVTFTEMTEGMNSSQLTFESGSENLLEAVVANICHSSSDVKSERSFCKSMQSLLTTDEMAESSGYTKHTIDSAGCPINQSHFIDGDMQQ…
evm.model.supercontig_52.7	MEGESGQENPLQLRSLTFAGNSNYGSYGSGDDQNQLFPMSDGVIESQPDTLSLSQWLHCSKTPCSYVEFLTGNSGYLENAPIADLMESVALPGGGIDAVERVSEVQRGLLNNDLEKVFAPRDNDSSSDMDAWKLKQCTCMLNSNFHEASVSFLKLQDGGSIYSKFQTYAQNQTFGTQEPSGNDCNSFHFRSKYGVQTSGFLSKPRNRRPRQGTSATDRQRRLRIADKLKALRGLLQNSEGSQTSVVDDVIGHIKFLQLQIKGYGHYILHEKTMNGPLEDLMGNLLEMNPSEATQLLESRGLYIMPISFAEGFCQAA
evm.model.supercontig_57.85	MERLQGPINSCFLEEHLDVEFLEQGFVNQENWRLEEEEELHLSIPSLEDKMPFLQMLQSVESSSFLPFKEPNFQTLLRLQHVKKPWELNPTLPDMDTQIQALEFESCVTHEIVDLDLPSPVKSETKDIQNPHSTSYVEGVSSVSNTNSGENYPREGNSGSSPPLTHPQIKPRDTHFPKSTPPITRERKKRKRTKTTKNKEEVESQRMTHIAVERNRRRQMNDHLNSLRSLMPPSYIQRGDQASIIGGAIDFVKELEQLLQSLETQKRMRKGEGSTDNSVCNSMTGISSNGLVVSRTQSGEEVKAENKSETADIEVTVIQNHVNMKIQCPRRHGQLLKAIVSLENLRLTVLHLNITTSQSRVHYSFNLKMEEECKLGSADEIASAVHQIFRYIIKGS
evm.model.supercontig_58.45	MDGLLQDLLKLQAETSFHSPFMNRTAFLPYTNISSSSYSSLVHCPSMNKKMIDFLRSNWHLNMNLKTQNPDRERCYRHMLNERIRREKQKQSYFALHALLPRGTKNDKNSIVQTASKSILELQRFREELKKRKSEFEGNLVVGNKTENTGETQIKIKVGNPTSGVDSMLQVLKCLNNMNSKLTTIQANFSPHQLSAVINIETQMIAGDVEKAVHTTLHEVEAKHQFQFPEDHHHHHPPCYIMESADTELNIYRSS
evm.model.supercontig_61.16	MDDTFLLDELTRRHFFRTLMNSFGCTYFCLWSYVPRTNCLIPLDGYFNEENEQASTSSGSLARNLFSEYRQSIINLENDSHVPGLAFRNNHPFIELRGAEIKRRAQSGTQRQFYQINMEMGMRELFPDDFLRQFPLGEFPHPTSQEQKSSSSSTLRSLDSPSEYSPFTFNIQRPSLDIPPLQALTTTTMETLSRIPNIHLPNRENEEDAITRAILAVLTSPCSSTSSSTQQNQNLPYHKHGLLNRKTGAFKRYNTSPKSQMIGASSRRPSMIKRAISYYQRLNILAREHILANRPTTTQLHHMISERKRREKLNESFQALRSLLLQEPSTREHITSLKGEIAELMKKNQELEAQLLHGKESKGDHEDDIEGNVSERVNVRVVNASESTSQDRVMELRVI…
evm.model.supercontig_6.173	MESAANIHFQFQLQEQLARYYSMATRSTASHKVSVPSHDWHPSTGFLNNDSNNMNYHRETISSSSSGSEPWAPSHHHQQSLLANHMKEEISDYNSFLKLLMTEINAEDSLSQNLISLDRNFSSTHHHQQLPELSGADHHHQSLQANNYNSYNDYMNYLRNNIDHVSTPTSRSLLYSSSNYANNSFVLRSELSSTYDHDNDDTGRNSSRQLSSSFAQRNLGGLNIRSGETSAIFMKSERDGSSITPSKRSCTKLKMSALESGSGRTKTPSIFTASGSMESQEKAKKYKTMPRSSCPPLKVRKEKLGDRIAALHKLVAPFGKTDTASVLTEAIGYIQFLHDQIQTLSVPYRKSSYKSGTRSFILASSSKEEDEKEGEKAELRSRGLCLVPLSCVSFLNLYN…
evm.model.supercontig_69.31	MERASSSRQHRNIQERNRRLRMRELCSTLVSLLPPQPTRVTVYELIGKATSYINQLKERIKAANDEKNQVLKLLGGGNGDRTGEEIRAVVKLTSRNQCSLEVNIISGTNKTFMLHEVISILQEEGAQVSNIALHNIVGHRTIYVIHSQAINSRIGLETSRIEERLLDLLC
evm.model.supercontig_69.33	MERASSSRQHRNIQERNRRLRMRELCSTLVSLLPPQPTRVTVYELIGEAANYINQLKERIKAANDERNQVLKLLGGGNGDRTGEEIRAVVKLTSRNQCSLEVNIISGTNKTFMLHEVISILQEEGAQVSNIALHNIVGHRTIYVIHSQAINSRIGLETSRIEERLLDLLC
evm.model.supercontig_9.363	MMENKRSPCSVNQSSLTSLASKRHKADLSFSNKEKKEKVGERIVALQKLVSPYGKTDTASVLLEAMEYIQFLHEQVKVLSAPYLQSLSAAKMQELEQYSLRSRGLCLVPISCTVGVARSNGADIWAPIKTSTSPRFEKPVSQFN
evm.model.supercontig_99.32	MESANLHHQHDQVEHNLAGTNSSCYGVTTSQAWTPNISLINGASTSGNIVSINSTDQSAHEYFPNFTEMLNSSHSTTAMKMINKDHNTMSSSDLIPINAHNLHQFYSHNSSIFGNFTQIHPTIDVSNFNIHMNLKAMDAGFNATCIQFSSTDLGKLSPSFPNQITSEEKRSSILVEKPNATEAPTKKSRLDSRASCPPFKARKEKLGDRIAALQQLVAPFGKTDTASVLMEAIGYIKFLQNQIETLSVAYMKSSSGKKMVRRAQKGLTAEEVESDEDRQDLRSRGLCLVPLSCMAYVTSSVGGEMLLHN
evm.TU.contig_26556.1	MAEECTESSVATSSSTPQNWPWDLHHHHNHAASWTTACWHQQQNPNSNNSSCEDDVSISTSFTNASNHSGLTVDSSRPLLESASSNDFMPEHQHAASDNHLWTHLLLHGGSNGELGNNQDVGENLVDPLSSKSVSTGILEAPYDYLKKVGSNWEFSNFDHPNQTDQIRFTKLSNLVSNWSIAPPDPEEINTTTHFDPHTTSCNISLATNKFSNSSNNHYSQLKQSLISPSTGSNLLLSYAPHHLKVENNQDHNHIINNIDQAPTTAYLNRRSSSSIGGYGNIGYHIGVNSNNNSVVVEGVDNYVMSQYALPCLSTTSTIADSPLHFPSRLTKPLIDAHASRPCTKPLHLSDSKKQALPTTTPTKANGRMQGGVLTNEGKKKRSEETSDAALKKPKHENS…
evm.TU.contig_30141.2	MVSETPAPENVEKVYVPSNVSDNRSSKGKIPKRVHKAEREKMKREHLNELFIELGNALELTQQNNGKASILCETSRLLKDLFDQIESLKKENASLISESRDVTIEKKELKEENSALETQIEKLQNEIAARVAQCKPDLNIPPLEFQQSELMSHFPGHGLGMPAGDALQQAPAVLVVPLHRDLQAYPATDITQPMLKPPSHVSKPHARYPTPADSWPSQLLREQPLAGKEFICRGSDDGVNNSPEQGR
evm.TU.contig_31184.1	MVCQAASQTRFRALKYENGIAGSATIVVRVIACFQPLQDCQILVLSGWERTLDPGFLGIDWNCNPLIFIPPVLHFIPLARIKFRGGPGCAQKRFLVFDQSGCQTRLIFSSGVETRNQHFTPLGPKFPGVNREVPQSKEELKIDIGMNSMDEVDGIHGTDVESEMREDTEELNALLYSDDSDGDGDYTEDDEVTSTGHSPSTMTAHGKQG
evm.TU.contig_36549.1	MNEEFEMNDFVSKLQALLSQLDHIPNSRVATSEVVKETCSYIRRLQREIDDLSERLSRLLDANPIALHVDTLIALLQQ
evm.model.supercontig_1175.1	FLCPARCPNAAVTELMCGPILHEGETIKVDQFTPKEAIFHEESDENDLYGEDSEMHEDTEEINALLYSDDDEDCGKEYGNDNDDDEVMSTGHSPVTIKGAYNEQEQLEEITEEVASSDGPHKRQKLLDGGYGELLLVGTANSVKSKESHEDDDDVEPSYDIGQAQTEEVGSIPGNKRLRNDKIRSTLRILESIIPRAKGKDPLVVLDEAIDYLKLLKHKGSALGVNWY
evm.model.supercontig_1383.2	MEDIEWDEPGFWDFFNLDSNALETQIKYPMDPPPPPPPPCFTSDLSLNPPTVPSPDLDQPQAADPAAAAVGEKEKGEKLIGADEKIIKKSGDDEEKKKKGKKEGKAEADKQTRIWAERKRRKKIKDMFQNLHGLMLSNPHGMMRPVPPKQSYSTNPDHALIALLLLLLLRD
evm.model.supercontig_1938.2	MKILFNNLFSLLPQHSTNPKEQGLTVADQIEETVEYIKSLDSKLKKSMEEKERLLMAIRNSRSTSFCKSSSSSPPKIEIGQVGSSLEIVLTSGLDYQFMFHEIICLIQQEGGEVLHANYSVLGNMIFHIVHAEISESKLGIGAAKIIREKLNKLVNGCMNDEEELWDIQIHNEMWGF
evm.model.supercontig_5.180	MCALYPFLPNWNWPLADPIGHEDNYVNYYRDDQGTLDSVLHFPLSSPNVFEPKHSPSFTTNNVTSSDSNGGVGARKSIAKKLDHNASERDRRRKLNTLFSSLRSLLPTSDHNVHEFPT
evm.TU.contig_34101.1	INLEFNDDMSLKKLLKAKRKENKKVGIAAGHRWQAFEVEMERLYRAKVRLDNMKHTLLKLKNQKARNLNKSQLLEESVIYVPVAELKEKA
evm.TU.contig_38183.1	MAKVDGKSTGQKANAHRSKHSETEQRRRSKINERQTYFFPSFX
