# Supplementary material for: Genome-wide analysis of basic helix-loop-helix transcription factors in papaya (Carica papaya L.)
Source: PeerJ. 2020 Jul 3;8:e9319. doi: 10.7717/peerj.9319 (PMC7341539; doi:10.7717/peerj.9319)
Supplement: Supplemental Information 8 [file peerj-08-9319-s008.xlsx]

## Sheet: Sheet1
		Table 2. Consensus sequences of bHLH domains
Conserved region	Position in the alignment	Frequencies of conserved amino acids within the OsbHLH domains	Position in the alignment	Frequencies of conserved amino acids within the AtbHLH domains	Position in the alignment	Frequencies of conserved amino acids within the CpbHLH domains
Basic	1	R (61%), K (27%)	1	R (24%), K (22%)	1	R (25%), K (30%)
	2	R (77%), K (16%)	2	R (35%)	2	R (42%)
	9	E (93%)	13	E (76%), A (10%)	13	E (86%), A (12%)
	10	R (81%), K (14%)	14	R (74%), K (14%)	14	R (86%), K (11%)
	14	R (91%)	16	R (91%)	16	R (100%)
Helix	16	I (35%), L (33%), V (23%)	20	I (52%), L (27%), M (12%)	20	I (60%), L (26%), M (12%)
	17	N (74%)	21	N (51%), S (19%)	21	N (56%), S (27%)
	20	F (72%), L (14%), I (9%)	24	F (26%), L (26%), M (20%), I (14%)	24	L (33%), M (32%), F (26%)
	23	L (98%)	27	L (100%)	27	L (99%)
	24	R (44%), K (35%)	28	Q (42%), R (35%)	28	Q (48%), R (38%)
Loop	47	K (58%), R (24%)	39	K (66%)	49	K (56%), R (11%)
Helix	54	L (98%)	46	L (76%), V (14%)	53	L (82%)
	57	A (76%)	49	A (60%), I (16%), V (12%)	56	A (55%), I (23%), V (12%)
	58	I (31%), V (27%), T (23%)	50	I (63%), V (22%)	57	I (73%), V (22%)
	60	Y (77%)	52	Y (78%)	59	Y (74%)
	61	I (69%), L (16%), V (8%)	53	I (40%), V (33%), L (13%)	60	V (58%), I (21%), L (18%)
	64	L (80%), M (7%)	56	L (93%)	63	L (100%)
