# Supplementary material for: Genome-wide analysis of basic helix-loop-helix transcription factors in papaya (Carica papaya L.)
Source: PeerJ. 2020 Jul 3;8:e9319. doi: 10.7717/peerj.9319 (PMC7341539; doi:10.7717/peerj.9319)
Supplement: Supplemental Information 9 [file peerj-08-9319-s009.xlsx]

## Sheet: Result
Raw data of qRT-PCR assay
Gene	Different treatments	Biological replicates（1）			Biological replicates（2）			Biological replicates（3）			CpTBP2			Biological replicates（1）			Biological replicates（2）			Biological replicates（3）			Biological replicates（1）			Biological replicates（2）			Biological replicates（3）			Biological replicates（1）			Biological replicates（2）			Biological replicates（3）			Biological replicates（1-3）			Average	SD
S6K	Sample 3	26.43	26.29				26.6				24.4424			1.98758	1.84758	2.15758																1	1												1	0
S6K	Sample 4	25.3	25.15				25.41				22.4956			2.80439	2.65439	2.91439																1	1												1	0
		Ct			Ct			Ct			Mean Ct			Ct-Mean Ct			Ct-Mean Ct			Ct-Mean Ct			∆∆Ct			∆∆Ct			∆∆Ct			2 -(∆∆Ct)			2 -(∆∆Ct)			2 -(∆∆Ct)
											TBP2																														平均			平均
Name	Four treatments	Ct1	Ct2	Ct3	Ct1	Ct2	Ct3	Ct1	Ct2	Ct3	Mean Ct1	Mean Ct2	Mean Ct3	∆Ct1	∆Ct2	∆Ct3	∆Ct1	∆Ct2	∆Ct3	∆Ct1	∆Ct2	∆Ct3	∆∆Ct1	∆∆Ct2	∆∆Ct3	∆∆Ct1	∆∆Ct2	∆∆Ct3	∆∆Ct1	∆∆Ct2	∆∆Ct3	2 -(∆∆Ct) 1	2 -(∆∆Ct) 2	2 -(∆∆Ct) 3	2 -(∆∆Ct) 1	2 -(∆∆Ct) 2	2 -(∆∆Ct) 3	2 -(∆∆Ct) 1	2 -(∆∆Ct) 2	2 -(∆∆Ct) 3	Average(1)	Average(2)	Average(3)	Average(1-3)	SD
supercontig_8.199	Control(roots)	26.8712	26.6882	26.6957	26.432	26.5076	26.4465	27.0345	26.9704	26.9265	23.8999	23.0914	24.7745	2.97128	2.7883	2.79576	3.3406	3.4162	3.3551	2.26	2.1959	2.152	0	0	0	0	0	0	0	0	0	1	1)	1	1	1	1	1	1	1	1	1	1	1	0
CpbHLH020	NacL(200mM)	28.9002	28.7157	28.6883	28.5211	28.6877	28.4088	29.1743	29.0502	29.1169	23.6383	22.8564	24.5981	5.26189	5.07745	5.05003	5.6647	5.8313	5.5524	4.5762	4.4521	4.5188	2.29061	2.28915	2.25427	2.3241	2.4151	2.1973	2.3162	2.2562	2.3668	0.204389	0.204597	0.209603	0.199699	0.187492	0.218045	0.200796	0.209323	0.193875	0.206196	0.201745	0.201331	0.203091	0.00269724
	PEG(25%)	27.4778	27.536	27.4886	27.3085	27.1646	27.1925	27.7156	27.7045	27.7008	23.2631	22.4993	24.1986	4.21471	4.27295	4.22549	4.8092	4.6653	4.6932	3.517	3.5059	3.5022	1.24342	1.48465	1.42972	1.4686	1.2491	1.3381	1.257	1.31	1.3502	0.422369	0.357335	0.371202	0.361333	0.420711	0.395541	0.418413	0.403321	0.392238	0.383635	0.392528	0.404657	0.393607	0.0105524
	ABA	28.2129	28.3182	28.2868	27.8096	27.9238	27.8865	28.5429	28.6502	28.726	23.2046	22.4128	24.2569	5.00824	5.11355	5.08215	5.3968	5.511	5.4737	4.286	4.3933	4.4691	2.03696	2.32525	2.28639	2.0562	2.0948	2.1186	2.026	2.1974	2.3171	0.243677	0.19954	0.204988	0.240449	0.234101	0.23027	0.245535	0.21803	0.20067	0.216069	0.23494	0.221412	0.22414	0.00972694
	Control(leaves)	23.3669	23.5453	23.4068	22.9668	23.0986	23.0512	23.7905	23.8689	23.7336	23.6353	22.8631	24.5997	-0.268402	-0.0900402	-0.228593	0.1037	0.2355	0.1881	-0.8092	-0.7308	-0.8661	0	0	0	0	0	0	0	0	0	1	1	1	1	1	1	1	1	1	1	1	1	1	0
	4℃	24.5436	24.9384	24.5046	24.0433	24.2478	23.9006	24.7826	24.8702	24.7859	24.3555	23.5097	25.2291	0.188084	0.582951	0.149095	0.5336	0.7381	0.3909	-0.4465	-0.3589	-0.4432	0.456486	0.672991	0.377688	0.4299	0.5026	0.2028	0.3627	0.3719	0.4229	0.728759	0.627205	0.76967	0.742313	0.705834	0.868863	0.777708	0.772764	0.745924	0.708545	0.772336	0.765465	0.748782	0.0350155
supercontig_21.176	Control(roots)	28.1178	27.5469	27.8756	26.8645	26.7409	26.8007	28.9749	28.7004	28.6069	23.8999	23.0914	24.7745	4.21785	3.64698	3.97565	3.7731	3.6495	3.7093	4.2004	3.9259	3.8324	0	0	0	0	0	0	0	0	0	1	1	1	1	1	1	1	1	1	1	1	1	1	0
CpbHLH060	NacL(200mM)	27.9886	27.4949	27.7097	26.8037	26.8946	26.8962	28.6105	28.7045	28.7112	23.6383	22.8564	24.5981	4.35027	3.85666	4.07137	3.94725	4.0382	4.0398	4.0124	4.1064	4.1131	0.132418	0.209686	0.0957173	0.17415	0.3887	0.3305	-0.188	0.1805	0.2807	0.912301	0.864725	0.935807	0.88629	0.763818	0.795261	1.13918	0.882397	0.823192	0.904278	0.815123	0.948257	0.889219	0.0678327
	PEG(25%)	27.5861	27.6628	27.4949	26.7397	26.6005	26.7995	28.6012	28.4648	28.4937	23.2631	22.4993	24.1986	4.32301	4.39977	4.23181	4.24035	4.1012	4.3002	4.40261	4.2662	4.2951	0.10516	0.75279	0.256162	0.46725	0.4517	0.5909	0.20221	0.3403	0.4627	0.929702	0.593455	0.837312	0.723342	0.731181	0.663929	0.869218	0.789877	0.725627	0.786823	0.70615	0.794907	0.762627	0.0490768
	ABA	27.5486	27.6279	27.4867	26.8674	26.9674	26.6023	28.5765	28.4345	28.4665	23.2046	22.4128	24.2569	4.34402	4.42326	4.28213	4.4546	4.5546	4.1895	4.3196	4.1776	4.2096	0.126173	0.776285	0.306484	0.6815	0.9051	0.4802	0.1192	0.2517	0.3772	0.916259	0.583868	0.80861	0.623517	0.533996	0.716878	0.920698	0.839906	0.76993	0.769579	0.624797	0.843512	0.745962	0.111253
	Control(leaves)	25.3182	25.3902	25.3887	24.4685	24.5043	24.5224	26.0435	25.9064	26.1375	23.6353	22.8631	24.5997	1.6829	1.75484	1.75335	1.6054	1.6412	1.6593	1.4438	1.3067	1.5378	0	0	0	0	0	0	0	0	0	1	1	1	1	1	1	1	1	1	1	1	1	1	0
	4℃	26.3445	26.9291	26.6547	25.7674	25.8448	25.7685	27.0123	27.2425	27.1234	24.3555	23.5097	25.2291	1.98907	2.57368	2.29921	2.2577	2.3351	2.2588	1.7832	2.0134	1.8943	0.30617	0.818836	0.545864	0.6523	0.6939	0.5995	0.3394	0.7067	0.3565	0.808786	0.566899	0.684981	0.636265	0.61818	0.659983	0.79037	0.61272	0.781057	0.686889	0.638143	0.728049	0.68436	0.0450065
supercontig_84.89	Control(roots)	25.0948	24.9671	24.9079	24.2435	24.1864	24.2006	26.0436	25.9869	25.8652	23.8999	23.0914	24.7745	1.19489	1.06716	1.00794	1.1521	1.095	1.1092	1.2691	1.2124	1.0907	0	0		0	0	0	0	0	0	1	1	1	1	1	1	1	1	1	1	1	1	1	0
CpbHLH041	NacL(200mM)	25.8362	25.4168	25.6435	25.0438	24.7763	24.6536	26.7869	26.5537	26.6075	23.6383	22.8564	24.5981	2.19789	1.77847	2.00524	2.1874	1.9199	1.7972	2.1888	1.9556	2.0094	1.003	0.711313	0.997302	1.0353	0.8249	0.688	0.9197	0.7432	0.9187	0.498963	0.610764	0.500936	0.487914	0.564521	0.620714	0.528619	0.597413	0.528985	0.536887	0.557716	0.551672	0.548759	0.0107158
	PEG(25%)	24.6643	24.9345	24.8846	23.8064	24.0763	23.9956	25.5981	25.9338	25.8129	23.2631	22.4993	24.1986	1.40126	1.6714	1.62155	1.3071	1.577	1.4963	1.3995	1.7352	1.6143	0.206371	0.604237	0.613609	0.155	0.482	0.3871	0.1304	0.5228	0.5236	0.866714	0.657819	0.65356	0.898132	0.715984	0.764665	0.913578	0.69602	0.695634	0.726031	0.792927	0.768411	0.762456	0.0338432
	ABA	24.7587	24.961	24.9002	23.9643	24.1149	24.0567	25.7574	25.8979	26.1114	23.2046	22.4128	24.2569	1.55409	1.75635	1.69563	1.5515	1.7021	1.6439	1.5005	1.641	1.8545	0.3592	0.689192	0.687688	0.3994	0.6071	0.5347	0.2314	0.4286	0.7638	0.779597	0.620201	0.620848	0.758174	0.656515	0.690302	0.851808	0.742982	0.588943	0.673549	0.701664	0.727911	0.701041	0.0271865
	Control(leaves)	24.8678	24.8688	24.7965	24.0123	24.1134	23.9886	25.8637	25.7991	25.8332	23.6353	22.8631	24.5997	1.23247	1.23347	1.1612	1.1492	1.2503	1.1255	1.264	1.1994	1.2335	0	0	0	0	0	0	0	0	0	1	1	1	1	1	1	1	1	1	1	1	1	1	0
	4℃	25.8747	26.2326	25.9056	25.1546	25.3349	25.0148	26.7547	26.9984	27.0051	24.3555	23.5097	25.2291	1.51924	1.87709	1.55017	1.6449	1.8252	1.5051	1.5256	1.7693	1.776	0.286774	0.643627	0.388971	0.4957	0.5749	0.3796	0.2616	0.5699	0.5425	0.819733	0.640102	0.763674	0.709217	0.671333	0.768651	0.834162	0.673663	0.68658	0.74117	0.7164	0.731469	0.72968	0.0124812
supercontig_85.115	Control(roots)	26.9432	26.6827	26.7044	26.2048	25.9437	25.9536	27.8995	27.6998	27.6024	23.8999	23.0914	24.7745	3.04333	2.78281	2.80452	3.1134	2.8523	2.8622	3.125	2.9253	2.8279	0	0	0	0	0	0	0	0	0	1	1	1	1	1	1	1	1	1	1	1	1	1	0
CpbHLH040	NacL(200mM)	26.1267	26.0499	26.1326	25.4345	25.2679	25.2369	27.0654	27.1105	26.9956	23.6383	22.8564	24.5981	2.48843	2.41163	2.49433	2.5781	2.4115	2.3805	2.4673	2.5124	2.3975	-0.554907	-0.371181	-0.310197	-0.5353	-0.4408	-0.4817	-0.6577	-0.4129	-0.4304	1.46907	1.29341	1.23988	1.44924	1.35736	1.39639	1.57757	1.33136	1.34761	1.33412	1.401	1.41884	1.38465	0.0446634
	PEG(25%)	26.5206	26.6046	26.5543	25.7869	25.8041	25.6754	27.6908	27.5234	27.5056	23.2631	22.4993	24.1986	3.25752	3.34154	3.29125	3.2876	3.3048	3.1761	3.4922	3.3248	3.307	0.214184	0.558733	0.486722	0.1742	0.4525	0.3139	0.3672	0.3995	0.4791	0.862034	0.678898	0.713645	0.886259	0.730775	0.804464	0.775286	0.758121	0.717425	0.751525	0.807166	0.750277	0.769656	0.0324905
	ABA	27.1967	27.1957	27.0048	26.6021	26.2998	26.1486	28.1076	28.2769	27.9986	23.2046	22.4128	24.2569	3.99211	3.99109	3.80023	4.1893	3.887	3.7358	3.8507	4.02	3.7417	0.948771	1.20828	0.995702	1.0759	1.0347	0.8736	0.7257	1.0947	0.9138	0.518074	0.432783	0.501492	0.474375	0.488117	0.545783	0.604704	0.468233	0.530785	0.484116	0.502759	0.534574	0.50715	0.0255139
	Control(leaves)	25.4115	25.5988	25.6648	24.5983	24.8009	24.8653	26.5024	26.5547	26.6048	23.6353	22.8631	24.5997	1.77619	1.96348	2.02949	1.7352	1.9378	2.0022	1.9027	1.955	2.0051	0	0	0	0	0	0	0	0	0	1	1	1	1	1	1	1	1	1	1	1	1	1	0
	4℃	26.7888	26.9291	27.0346	26.1466	26.1096	25.9809	27.9043	27.8335	27.7247	24.3555	23.5097	25.2291	2.43334	2.57366	2.67912	2.6369	2.5999	2.4712	2.6752	2.6044	2.4956	0.657156	0.610174	0.649631	0.9017	0.6621	0.469	0.7725	0.6494	0.4905	0.634127	0.655118	0.637443	0.535256	0.631958	0.722465	0.585402	0.637545	0.711778	0.642229	0.629893	0.644909	0.63901	0.00800877
supercontig_45766.1	Control(roots)	24.3766	24.0618	24.1192	23.7758	23.4709	23.5142	24.8769	24.7896	24.7072	23.8999	23.0914	24.7745	0.476698	0.161863	0.21932	0.6844	0.3795	0.4228	0.1024	0.0151	-0.0673	0	0	0	0	0	0	0	0	0	1	1	1	1	1	1	1	1	1	1	1	1	1	0
CpbHLH053	NacL(200mM)	25.3375	24.9679	25.1338	24.0343	24.2126	24.1508	25.8409	25.5124	25.5996	23.6383	22.8564	24.5981	1.69917	1.32964	1.4955	1.1779	1.3562	1.2944	1.2428	0.9143	1.0015	1.22248	1.16778	1.27618	1.1779	1.3562	1.2944	1.2428	0.9143	1.0015	0.428547	0.445106	0.412889	0.441994	0.39061	0.407706	0.422552	0.530601	0.49948	0.428847	0.413437	0.484211	0.442165	0.0372194
	PEG(25%)	25.26	25.2974	25.1997	24.4668	24.7001	24.5347	25.8941	25.9034	25.799	23.2631	22.4993	24.1986	1.99695	2.03428	1.93657	1.9675	2.2008	2.0354	1.6955	1.7048	1.6004	1.52026	1.87241	1.71725	1.2831	1.8213	2.0354	1.5931	1.6897	1.5331	0.348624	0.273116	0.304128	0.410912	0.282966	0.24394	0.331458	0.309991	0.345534	0.308623	0.312606	0.328995	0.316741	0.0107971
	ABA	25.8763	25.9908	25.8046	25.3768	25.4006	25.2241	26.6358	26.5113	26.5857	23.2046	22.4128	24.2569	2.67173	2.78617	2.60003	2.964	2.9878	2.8113	2.3789	2.2544	2.3288	2.19504	2.62431	2.38071	2.2796	2.6083	2.3885	2.2765	2.2393	2.3961	0.218388	0.162183	0.192015	0.205955	0.163992	0.190981	0.206398	0.211789	0.189977	0.190862	0.186976	0.202721	0.19352	0.00820236
	Control(leaves)	25.5484	25.7439	25.5504	24.9931	25.1039	24.9067	26.3164	26.2205	26.3924	23.6353	22.8631	24.5997	1.91304	2.10856	1.91508	2.13	2.2408	2.0436	1.7167	1.6208	1.7927	0	0	0	0	0	0	0	0	0	1	1	1	1	1	1	1	1	1	1	1	1	1	0
	4℃	26.5874	26.9363	26.4856	26.0008	26.1465	26.0125	27.2089	27.4386	27.0294	24.3555	23.5097	25.2291	2.23189	2.58087	2.13017	2.4911	2.6368	2.5028	1.9798	2.2095	1.8003	-0.000238419	0.366213	-0.247727	0.3611	0.396	0.4592	0.2631	0.5887	0.0076	0.366213	0.775816	1.18733	0.778571	0.759962	0.727389	0.833295	0.664942	0.994746	0.776455	0.755308	0.830994	0.787586	0.0390518
supercontig_92.83	Control(roots)	26.27	26.132	26.1146	25.4693	25.3967	25.3007	27.0467	26.9043	26.9345	23.8999	23.0914	24.7745	2.37012	2.23213	2.21465	2.3779	2.3053	2.2093	2.2722	2.1298	2.16	2.37012	2.23213	0	0	0	0	0	0	0	1	1	1	1	1	1	1	1	1	1	1	1	1	0
CpbHLH069	NacL(200mM)	26.6687	26.5331	26.5747	25.5046	25.4996	25.6947	27.3325	27.4546	27.3038	23.6383	22.8564	24.5981	3.03044	2.89484	2.9364	2.6482	2.6432	2.8383	2.7344	2.8565	2.7057	3.03044	2.89484	0.721742	0.2703	0.3379	0.629	0.4622	0.7267	0.5457	0.122391	0.134451	0.606365	0.829147	0.791192	0.646624	0.725879	0.604285	0.685059	0.287736	0.755655	0.671741	0.57171	0.249483
	PEG(25%)	26.0592	26.1007	26.0352	24.8435	24.9501	24.8209	26.2546	26.4135	26.3653	23.2631	22.4993	24.1986	2.79616	2.83758	2.77209	2.3442	2.4508	2.3216	2.056	2.2149	2.1667	2.79616	2.83758	0.557432	-0.0337	0.1455	0.1123	-0.2162	0.0851	0.0067	0.14397	0.139895	0.67951	1.02363	0.904066	0.925112	1.16167	0.942719	0.995367	0.321125	0.950937	1.03325	0.768438	0.389565
	ABA	26.7623	26.6386	26.6996	25.4154	25.4964	25.5996	27.2695	27.4024	27.3031	23.2046	22.4128	24.2569	3.55773	3.43395	3.49497	3.0026	3.0836	3.1868	3.0126	3.1455	3.0462	3.55773	3.43395	1.28031	0.6247	0.7783	0.9775	0.7404	1.0157	0.8862	0.0849212	0.0925289	0.411707	0.648555	0.583053	0.507859	0.598573	0.494588	0.541037	0.196386	0.579822	0.544733	0.440314	0.211975
	Control(leaves)	24.863	24.8725	24.791	23.957	23.8799	23.9065	25.5003	25.6457	25.5994	23.6353	22.8631	24.5997	1.22762	1.23713	1.15561	1.0939	1.0168	1.0434	0.9006	1.046	0.9997	1.22762	1.23713	0	0	0	0	0	0	0	0.427022	0.424216	1	1	1	1	1	1	1	0.617079	1	1	0.87236	0.221079
	4℃	26.0786	26.2454	26.1146	25.2104	25.0215	25.3576	26.7467	26.8412	26.7024	24.3555	23.5097	25.2291	1.72311	1.88994	1.75911	1.7007	1.5118	1.8479	1.5176	1.6121	1.4733	1.72311	1.88994	0.603504	0.6068	0.495	0.8045	0.617	0.5661	0.4736	0.302895	0.269818	0.658153	0.656652	0.709562	0.57256	0.652025	0.67544	0.720165	0.410289	0.646258	0.682544	0.579697	0.147829
supercontig_70.77	Control(roots)	28.0057	27.9817	27.8835	27.2204	27.1049	27.0806	28.6047	28.5957	28.6637	23.8999	23.0914	24.7745	4.10574	4.08177	3.98355	4.129	4.0135	3.9892	3.8302	3.8212	3.8892	4.10574	0	0	0	0	0	0	0	0	1	1	1	1	1	1	1	1	1	1	1	1	1	0
CpbHLH062	NacL(200mM)	28.9625	28.9139	28.889	28.4643	28.2012	28.1024	30.0045	29.8945	29.8803	23.6383	22.8564	24.5981	5.32417	5.27561	5.25076	5.6079	5.3448	5.246	5.4064	5.2964	5.2822	5.32417	5.27561	1.26722	1.4789	1.3313	1.2568	1.5762	1.4752	1.393	0.0249612	0.0258156	0.41546	0.358762	0.39741	0.418471	0.335364	0.359684	0.380772	0.155412	0.391548	0.358607	0.301856	0.127889
	PEG(25%)	27.7331	27.9058	27.779	27.0967	27.1069	27.1836	28.5642	28.8345	28.7143	23.2631	22.4993	24.1986	4.47	4.64269	4.51588	4.5974	4.6076	4.6843	4.3656	4.6359	4.5157	4.47	4.64269	0.532338	0.4684	0.5941	0.6951	0.5354	0.8147	0.6265	0.0451227	0.0400324	0.691433	0.722766	0.662458	0.617667	0.689967	0.568527	0.647746	0.258863	0.66763	0.635413	0.520635	0.227273
	ABA	28.7535	28.9984	28.9908	28.0014	28.2012	28.0657	29.7023	29.9934	29.9025	23.2046	22.4128	24.2569	5.54892	5.79374	5.78617	5.5886	5.7884	5.6529	5.4454	5.7365	5.6456	5.54892	5.79374	1.80263	1.4596	1.7749	1.6637	1.6152	1.9153	1.7564	0.0213604	0.0180264	0.286652	0.363594	0.292215	0.315629	0.32642	0.265117	0.295986	0.10868	0.323812	0.295841	0.242778	0.116971
	Control(leaves)	24.7716	24.313	24.4469	24.0015	23.8765	23.8024	25.3308	25.2435	25.3807	23.6353	22.8631	24.5997	1.13624	0.677656	0.811528	1.1384	1.0134	0.9393	0.7311	0.6438	0.781	1.13624	0.677656	0	0	0	0	0	0	0	0.454943	0.62518	1	1	1	1	1	1	1	0.693374	1	1	0.897791	0.17703
	4℃	24.4518	24.3401	24.3065	23.8869	23.7934	23.6112	25.2709	25.2034	25.4107	24.3555	23.5097	25.2291	0.0963333	-0.0153461	-0.0489443	0.3772	0.2837	0.1015	0.0418	-0.0257	0.1816	0.0963333	-0.0153461	-0.860473	-0.7612	-0.7297	-0.8378	-0.6893	-0.6695	-0.5994	0.935407	1.01069	1.81563	1.6949	1.65829	1.78732	1.6125	1.59052	1.51509	1.25391	1.71351	1.5727	1.51337	0.235471
supercontig_537.2	Control(roots)	28.6018	28.4399	28.4603	27.8143	27.6657	26.5908	29.5504	29.3807	29.4126	23.8999	23.0914	24.7745	4.70191	4.54002	4.56043	4.7229	4.5743	3.4994	4.7759	4.6062	4.6381	0	0	0	0	0	0	0	0	0	1	1	1	1	1	1	1	1	1	1	1	1	1	0
CpbHLH065	NacL(200mM)	27.5974	27.3998	27.4007	26.5808	26.4983	26.5845	28.4362	28.2118	29.3114	23.6383	22.8564	24.5981	3.95906	3.76151	3.76239	3.7244	3.6419	3.7281	3.8381	3.6137	4.7133	-0.742846	-0.77851	-0.798045	-0.9985	-0.9324	0.2287	-0.9378	-0.9925	0.0752	1.67347	1.71536	1.73874	1.99792	1.90845	0.853404	1.9156	1.98963	0.949211	1.70919	1.58659	1.61815	1.63798	0.0636602
	PEG(25%)	27.692	27.9388	27.7861	26.8984	26.7004	26.9689	28.7006	28.8356	28.7993	23.2631	22.4993	24.1986	4.42892	4.67569	4.52305	4.3991	4.2011	4.4696	4.502	4.637	4.6007	4.42892	4.67569	-0.0373835	-0.3238	-0.3732	0.9702	-0.2739	0.0308	-0.0374	0.0464261	0.0391271	1.02625	1.25162	1.29522	0.510435	1.20907	0.978877	1.02626	0.370601	1.01909	1.0714	0.820366	0.390385
	ABA	28.7688	28.9056	28.7995	27.8356	27.8135	27.7243	29.6523	29.7992	29.7341	23.2046	22.4128	24.2569	5.56416	5.70095	5.59484	5.4228	5.4007	5.3115	5.3954	5.5423	5.4772	5.56416	5.70095	1.03441	0.6999	0.8264	1.8121	0.6195	0.9361	0.8391	0.0211359	0.019224	0.488215	0.615615	0.563935	0.284776	0.650896	0.522644	0.558992	0.176192	0.488109	0.577511	0.413937	0.21069
	Control(leaves)	26.8563	27.2321	27.0047	26.1136	26.1209	26.2263	27.8046	28.0176	27.9908	23.6353	22.8631	24.5997	3.22096	3.59671	3.36931	3.2505	3.2578	3.3632	3.2049	3.4179	3.3911	3.22096	3.59671	0	0	0	0	0	0	0	0.107249	0.0826576	1	1	1	1	1	1	1	0.396636	1	1	0.798879	0.348353
	4℃	28.5448	28.6269	28.5878	27.6596	27.6064	27.4638	29.4768	29.4347	29.3572	24.3555	23.5097	25.2291	4.18929	4.27145	4.2323	4.1499	4.0967	3.9541	4.2477	4.2056	4.1281	4.18929	4.27145	0.862982	0.8994	0.8389	0.5909	1.0428	0.7877	0.737	0.054815	0.0517804	0.549815	0.53611	0.55907	0.663929	0.485385	0.579267	0.599986	0.218803	0.586369	0.554879	0.453351	0.203733
supercontig_6.255	Control(roots)	30.984	30.9858	30.9357	30.1196	30.2503	30.2649	31.2543	31.1586	31.1126	23.8999	23.0914	24.7745	7.08407	7.08585	7.03583	7.0282	7.1589	7.1735	6.4798	6.3841	6.3381	0	0		0	0	0	0	0	0	1	1	1	1	1	1	1	1	1	1	1	1	1	0
CpbHLH022	NacL(200mM)	28.7953	28.5197	28.6044	27.9014	27.8856	27.8964	28.8499	28.9764	28.9836	23.6383	22.8564	24.5981	5.15701	4.88138	4.96615	5.045	5.0292	5.04	4.2518	4.3783	4.3855	-1.92706	-2.20447	-2.06968	-1.9832	-2.1297	-2.1335	-2.228	-2.0058	-1.9526	3.80279	4.60904	4.19793	3.95369	4.37626	4.38781	4.68484	4.01611	3.87071	4.20325	4.23925	4.19056	4.21102	0.0252609
	PEG(25%)	28.6228	28.8612	28.6987	27.9967	28.0646	28.0038	28.9175	29.0243	28.9946	23.2631	22.4993	24.1986	5.3597	5.59808	5.43566	5.4974	5.5653	5.5045	4.7189	4.8257	4.796	-1.72437	-1.48777	-1.60017	-1.5308	-1.5936	-1.669	-1.7609	-1.5584	-1.5421	3.30435	2.80456	3.03178	2.88946	3.01802	3.17994	3.38909	2.94527	2.91218	3.0469	3.02914	3.08218	3.05274	0.0269998
	ABA	29.6351	29.6907	29.6499	28.8464	28.9001	28.7995	30.0661	30.1104	30.1869	23.2046	22.4128	24.2569	6.43048	6.48609	6.4453	6.4336	6.4873	6.3867	5.8092	5.8535	5.93	-0.653593	-0.599766	-0.590533	-0.5946	-0.6716	-0.7868	-0.6706	-0.5306	-0.4081	1.57308	1.51547	1.5058	1.51005	1.59284	1.72524	1.59173	1.44453	1.32694	1.53145	1.60938	1.4544	1.53174	0.0774894
	Control(leaves)	28.3485	28.441	28.3006	27.5294	27.6039	27.5019	28.6004	28.7309	28.5963	23.6353	22.8631	24.5997	4.71315	4.80562	4.66523	4.6663	4.7408	4.6388	4.0007	4.1312	3.9966	0	0	0	0	0	0	0	0	0	1	1	1	1	1	1	1	1	1	1	1	1	1	0
	4℃	28.9342	29.3247	29.1007	28.1134	28.0785	28.0394	29.3907	29.3812	29.4006	24.3555	23.5097	25.2291	4.57871	4.96923	4.74519	4.6037	4.5688	4.5297	4.1616	4.1521	4.1715	-0.134432	0.163618	0.0799542	-0.0626	-0.172	-0.1091	0.1609	0.0209	0.1749	1.09766	0.892783	0.946088	1.04435	1.12662	1.07856	0.894467	0.985618	0.885829	0.978844	1.08317	0.921971	0.994663	0.0817572
supercontig_17.155	Control(roots)	25.7467	25.6104	25.6655	24.9334	24.8935	24.7438	26.6638	26.5418	26.6031	23.8999	23.0914	24.7745	1.84676	1.71045	1.76557	1.842	0.119	1.6524	1.8893	1.7673	1.8286	0	0	0	0	0	0	0	0	0	1	1	1	1	1	1	1	1	1	1	1	1	1	0
CpbHLH006	NacL(200mM)	25.9339	26.0913	26.0068	25.2024	25.1683	25.2617	26.8836	26.8162	26.1994	23.6383	22.8564	24.5981	2.29557	2.45301	2.36856	2.346	0.5702	2.4053	2.2855	2.2181	1.6013	0.448814	0.742558	0.602994	0.504	0.4512	0.7529	0.3962	0.4508	-0.2273	0.732645	0.597679	0.658386	0.705149	0.731434	0.59341	0.759857	0.731637	1.17064	0.662903	0.676664	0.887379	0.742315	0.125817
	PEG(25%)	25.1656	25.3064	25.31	24.5102	24.4952	24.4127	26.5281	25.5748	25.6001	23.2631	22.4993	24.1986	1.90252	2.04327	2.04687	2.0109	0.2966	1.9134	2.3295	1.3762	1.4015	0.0557648	0.33282	0.281308	0.1689	0.1776	0.261	0.4402	-0.3911	-0.4271	0.962084	0.793983	0.822845	0.889521	0.884173	0.834509	0.737032	1.31139	1.34453	0.859637	0.869401	1.13098	0.953341	0.153921
	ABA	25.5472	25.524	25.3566	24.81	24.6263	24.7732	26.2312	26.3963	26.4449	23.2046	22.4128	24.2569	2.3426	2.31943	2.15203	2.39724	0.3694	2.3604	1.9743	2.1394	2.188	0.49584	0.608985	0.386465	0.55524	0.2504	0.708	0.085	0.3721	0.3594	0.709149	0.655658	0.765002	0.680544	0.840663	0.612168	0.942785	0.772657	0.779489	0.709936	0.711125	0.831643	0.750902	0.069927
	Control(leaves)	25.4026	25.4356	25.5989	24.8016	24.7346	24.6583	26.5547	26.6086	26.4837	23.6353	22.8631	24.5997	1.76729	1.80028	1.96353	1.9385	0.1349	1.7952	1.955	2.0089	1.884	0	0	0	0	0	0	0	0	0	1	1	1	1	1	1	1	1	1	1	1	1	1	0
	4℃	26.32	26.3587	26.2005	25.4221	25.4026	25.4336	27.162	27.0634	27.1002	24.3555	23.5097	25.2291	1.96453	2.00327	1.84507	1.9124	0.1735	1.9239	1.9329	1.8343	1.8711	0.197239	0.202993	-0.118455	-0.0261	0.0386	0.1287	-0.0221	-0.1746	-0.0129	0.872218	0.868747	1.08557	1.01826	0.973599	0.914655	1.01544	1.12865	1.00898	0.942179	0.968837	1.05102	0.987346	0.0567338
supercontig_6.130	Control(roots)	30.1019	29.8249	29.9967	29.2562	29.1134	29.2704	30.8842	30.7069	30.7561	23.8999	23.0914	24.7745	6.20201	5.92494	6.09683	6.1648	6.022	6.179	6.1097	5.9324	5.9816	0	0	0	0	0	0	0	0	0	1	1	1	1	1	1	1	1	1	1	1	1	1	0
CpbHLH042	NacL(200mM)	30.5346	30.623	30.5547	29.7765	29.8064	29.7236	31.5208	31.5989	31.4786	23.6383	22.8564	24.5981	6.8963	6.98467	6.91639	6.9201	6.95	6.8672	6.9227	7.0008	6.8805	0.694292	1.05973	0.819558	0.7553	0.928	0.6882	0.813	1.0684	0.8989	0.618013	0.479723	0.566615	0.592423	0.525586	0.620628	0.569197	0.476848	0.536295	0.554784	0.579546	0.527447	0.553925	0.0260602
	PEG(25%)	31.3726	31.4177	31.4995	30.8976	30.7936	30.9126	32.5906	32.7996	32.6546	23.2631	22.4993	24.1986	8.10948	8.15462	8.23645	8.3983	8.2943	8.4133	8.392	8.601	8.456	1.90747	2.22968	2.13962	1.4782	1.3443	1.5461	1.4693	1.6002	1.5755	0.26656	0.213207	0.22694	0.358936	0.393845	0.342435	0.361157	0.329831	0.335527	0.235569	0.365072	0.342172	0.314271	0.0691131
	ABA	32.0931	32.0944	32.1567	32.8542	32.7349	32.7206	34.7436	34.7968	34.8546	23.2046	22.4128	24.2569	8.88846	8.88976	8.95213	10.4414	10.3221	10.3078	10.4867	10.5399	10.5977	2.68646	2.96482	2.8553	2.0431	2.0278	1.8945	2.0947	1.9389	2.1417	0.155345	0.128086	0.138187	0.242642	0.245229	0.268967	0.234117	0.260815	0.226613	0.140539	0.252279	0.240515	0.211111	0.0613994
	Control(leaves)	24.9398	25.2118	25.0537	24.3156	24.4673	24.3369	25.8865	25.9001	25.9654	23.6353	22.8631	24.5997	1.30445	1.57641	1.41833	1.4525	1.6042	1.4738	1.2868	1.3004	1.3657	0	0	0	0	0	0	0	0	0	1	1	1	1	1	1	1	1	1	1	1	1	1	0
	4℃	26.0962	26.5666	26.5422	25.4356	25.6634	25.7007	27.0943	26.9924	26.8901	24.3555	23.5097	25.2291	1.74069	2.21118	2.18672	1.9259	2.1537	2.191	1.8652	1.7633	1.661	0.436243	0.634771	0.768395	0.4734	0.5495	0.7172	0.5784	0.4629	0.2953	0.739057	0.644043	0.58707	0.720265	0.683257	0.608277	0.669706	0.725526	0.814903	0.656723	0.6706	0.736712	0.688012	0.0427425
														0	0
supercontig_71.72	Control(roots)	24.4237	24.2052	24.2246	23.6675	23.4509	23.4667	25.3658	25.1264	25.3068	23.8999	23.0914	24.7745	0.523779	0.305298	0.32465	0.5761	0.3595	0.3753	0.5913	0.3519	0.5323	0	0	0	0	0	0	0	0	0	1	1	1	1	1	1	1	1	1	1	1	1	1	0
CpbHLH070	NacL(200mM)	23.9897	23.8188	23.8856	23.2204	23.0879	23.1064	24.9856	24.9336	24.8596	23.6383	22.8564	24.5981	0.35141	0.180544	0.247357	0.364	0.2315	0.25	0.3875	0.3355	0.2615	-0.172369	-0.124754	-0.0772929	-0.2121	-0.128	-0.1253	-0.2038	-0.0164	-0.2708	1.12691	1.09032	1.05504	1.15837	1.09278	1.09073	1.15173	1.01143	1.20648	1.09076	1.11396	1.12321	1.10931	0.0167212
	PEG(25%)	23.3759	23.5553	23.4237	22.4049	22.5034	22.4756	24.3056	24.4678	24.3365	23.2631	22.4993	24.1986	0.112852	0.292171	0.16057	-0.0944	0.0041	-0.0237	0.107	0.2692	0.1379	-0.410927	-0.0131264	-0.16408	-0.4584	-0.2274	-0.2737	-0.2805	-0.0663	-0.1236	1.32954	1.00914	1.12045	1.37402	1.17072	1.2089	1.21462	1.04703	1.08945	1.15304	1.25121	1.11703	1.17376	0.0694499
	ABA	23.0476	22.9252	23.1097	21.8427	21.7964	21.7067	23.6965	23.9968	23.9075	23.2046	22.4128	24.2569	-0.157036	-0.279391	-0.0949545	-0.5701	-0.6164	-0.7061	-0.5604	-0.2601	-0.3494	-0.157036	-0.279391	-0.255525	-0.4757	-0.6205	-0.6824	-0.6674	-0.5293	-0.4873	1.11499	1.21368	1.19377	1.39059	1.53741	1.60481	1.58821	1.44323	1.40182	1.17415	1.51094	1.47775	1.38761	0.185608
	Control(leaves)	23.3242	23.6994	23.4485	22.6045	22.8744	22.6778	24.7965	24.2258	24.3983	23.6353	22.8631	24.5997	-0.311159	0.0640678	-0.186836	-0.2586	0.0113	-0.1853	0.1968	-0.3739	-0.2014	0	0	0	0	0	0	0	0	0	1	1	1	1	1	1	1	1	1	1	1	1	1	0
	4℃	24.4418	24.5345	24.4866	24.0559	23.9065	23.9886	25.3634	25.2675	25.3997	24.3555	23.5097	25.2291	0.0863544	0.179067	0.131106	0.5462	0.3968	0.4789	0.1343	0.0384	0.1706	0.397514	0.114999	0.317942	0.8048	0.3855	0.6642	-0.0625	0.4123	0.372	0.759166	0.923383	0.802214	0.572441	0.765514	0.631039	1.04427	0.751424	0.772711	0.828254	0.656331	0.856136	0.78024	0.10821
														0	0
														0	0
supercontig_142.14	Control(roots)	30.9244	31.0273	30.979	30.2436	30.1174	30.1765	31.8863	31.9964	31.9023	23.8999	23.0914	24.7745	7.02454	7.12735	7.07905	7.1522	7.026	7.0851	7.1118	7.2219	7.1278	0	0	0	0	0	0	0	0	0	1	1	1	1	1	1	1	1	1	1	1	1	1	0
CpbHLH046	NacL(200mM)	30.9879	30.9635	30.9135	30.3646	30.3979	30.4668	32.1027	32.1907	32.1347	23.6383	22.8564	24.5981	7.34959	7.32518	7.27518	7.5082	7.5415	7.6104	7.5046	7.5926	7.5366	0.325051	0.197838	0.196129	0.356	0.5155	0.5253	0.3928	0.3707	0.4088	0.79827	0.871856	0.87289	0.781328	0.69955	0.694815	0.76165	0.773407	0.75325	0.847672	0.725231	0.762769	0.778557	0.0627288
	PEG(25%)	27.7979	27.9826	27.8074	27.2348	27.1127	27.1006	28.8605	28.9324	28.9806	23.2631	22.4993	24.1986	4.53478	4.71951	4.54435	4.7355	4.6134	4.6013	4.6619	4.7338	4.782	-2.48975	-2.40784	-2.5347	-2.4167	-2.4126	-2.4838	-2.4499	-2.4881	-2.3458	5.61682	5.30679	5.79456	5.33948	5.32433	5.59369	5.46378	5.61039	5.08342	5.57272	5.41917	5.38586	5.45925	0.099671
	ABA	31.3898	31.0221	31.115	30.6044	30.4456	30.4908	32.2574	32.3938	32.2074	23.2046	22.4128	24.2569	8.18523	7.81753	7.91036	8.1916	8.0328	8.078	8.0005	8.1369	7.9505	1.16069	0.690186	0.831306	1.0394	1.0068	0.9929	0.8887	0.915	0.8227	0.447298	0.619774	0.56202	0.48653	0.497649	0.502467	0.540101	0.530344	0.565383	0.543031	0.495548	0.545276	0.527952	0.0280845
	Control(leaves)	32.6515	32.6364	32.6573	31.8856	31.8037	31.7958	33.5637	33.6011	33.4409	23.6353	22.8631	24.5997	9.0162	9.00109	9.022	9.0225	8.9406	8.9327	8.964	9.0014	8.8412	0	0	0	0	0	0	0	0	0	1	1	1	1	1	1	1	1	1	1	1	1	1	0
	4℃	36.3593	36.4041	36.335	35.4607	35.3997	35.5847	36.9053	36.9756	36.9635	24.3555	23.5097	25.2291	12.0039	12.0486	11.9795	11.951	11.89	12.075	11.6762	11.7465	11.7344	2.98768	3.04754	2.95751	2.9285	2.9494	3.1423	2.7122	2.7451	2.8932	0.126072	0.120948	0.128736	0.131351	0.129462	0.113259	0.152597	0.149157	0.134605	0.125252	0.124691	0.145453	0.131798	0.0118283
														0	0																		1
supercontig_106.57	Control(roots)	32.1325	32.1672	32.1147	31.3067	31.3365	31.4012	33.0745	32.9958	33.1022	23.8999	23.0914	24.7745	8.23259	8.26726	8.21477	8.2153	8.2451	8.3098	8.3	8.2213	8.3277	0	0	0	0	0	0	0	0	0	1	1	1	1	1	1	1	1	1	1	1	1	1	0
CpbHLH050	NacL(200mM)	32.857	32.9647	32.8847	31.9045	32.0046	32.0825	33.6034	33.8824	33.6127	23.6383	22.8564	24.5981	9.21873	9.3264	9.24637	9.0481	9.1482	9.2261	9.0053	9.2843	9.0146	0.986137	1.05914	1.0316	0.8328	0.9031	0.9163	0.7053	1.063	0.6869	0.504828	0.479918	0.489168	0.561439	0.534736	0.529866	0.613315	0.478636	0.621187	0.491305	0.542014	0.571046	0.534788	0.0403588
	PEG(25%)	27.9573	27.9331	27.874	27.2145	27.2908	27.0734	28.8845	28.9034	28.9908	23.2631	22.4993	24.1986	4.69422	4.66999	4.61089	4.7152	4.7915	4.5741	4.6859	4.7048	4.7922	-3.53837	-3.59727	-3.60389	-3.5001	-3.4536	-3.7357	-3.6141	-3.5165	-3.5355	11.6187	12.1028	12.1584	11.3145	10.9556	13.3216	12.2448	11.4438	11.5956	11.96	11.8639	11.7614	11.8618	0.0993001
	ABA	31.2121	31.2281	31.2007	30.4571	30.5007	30.3856	32.2054	32.2906	32.3007	23.2046	22.4128	24.2569	8.00745	8.02347	7.99604	8.0443	8.0879	7.9728	7.9485	8.0337	8.0438	-0.225142	-0.243792	-0.218729	-0.171	-0.1572	-0.337	-0.3515	-0.1876	-0.2839	1.16889	1.1841	1.16371	1.12584	1.11512	1.26313	1.27589	1.13887	1.21748	1.17223	1.16803	1.21075	1.18367	0.0235426
	Control(leaves)	33.5538	33.6288	33.5006	32.756	32.8851	33.7128	34.4936	34.5542	34.4307	23.6353	22.8631	24.5997	9.91844	9.99348	9.8653	9.8929	10.022	10.8497	9.8939	9.9545	9.831	0	0	0	0	0	0	0	0		1	1	1	1	1	1	1	1	1	1	1	1	1	0
	4℃	35.7378	35.9979	35.8848	35.1647	35.2967	35.1857	36.7605	36.8056	36.7908	24.3555	23.5097	25.2291	11.3823	11.6424	11.5293	11.655	11.787	11.676	11.5314	11.5765	11.5617	1.46388	1.64893	1.664	1.7621	1.765	0.8263	1.6375	1.622	1.7307	0.362516	0.318876	0.315564	0.294819	0.294227	0.563974	0.321413	0.324885	0.301306	0.332319	0.38434	0.315868	0.344175	0.0357427
														0	0																	1	1
supercontig_27490.2	Control(roots)	32.6499	32.7808	32.6674	31.8846	31.9042	31.8094	33.5637	33.6504	33.5017	23.8999	23.0914	24.7745	8.75	8.88093	8.76752	8.7932	8.8128	8.718	8.7892	8.8759	8.7272	0	0	0	0	0	0	0	0	0	1	1	1	1	1	1	1	1	1	1	1	1	1	0
CpbHLH052	NacL(200mM)	31.6663	31.8206	31.7786	30.8996	31.0053	30.9049	32.5567	32.7026	32.6015	23.6383	22.8564	24.5981	8.02799	8.18227	8.14028	8.0432	8.1489	8.0485	7.9586	8.1045	8.0034	-0.722006	-0.698666	-0.627243	-0.75	-0.6639	-0.6695	-0.8306	-0.7714	-0.7238	1.64947	1.623	1.54461	1.68179	1.58436	1.59052	1.77842	1.70693	1.65153	1.6057	1.61889	1.71229	1.64563	0.05811
	PEG(25%)	28.9694	28.9462	28.9032	28.1874	28.1996	28.0954	29.8847	29.9016	29.8042	23.2631	22.4993	24.1986	5.70634	5.68309	5.64017	5.6881	5.7003	5.5961	5.6861	5.703	5.6056	-3.04366	-3.19784	-3.12735	-3.1051	-3.1125	-3.1219	-3.1031	-3.1729	-3.1216	8.24581	9.17586	8.7383	8.60455	8.6488	8.70534	8.59263	9.01858	8.70353	8.71999	8.6529	8.77158	8.71482	0.0595099
	ABA	29.8483	29.9075	29.8956	29.0046	29.1123	29.0962	30.8745	30.9046	30.8003	23.2046	22.4128	24.2569	6.6437	6.70289	6.69102	6.5918	6.6995	6.6834	6.6176	6.6477	6.5434	-2.10629	-2.17804	-2.0765	-2.2014	-2.1133	-2.0346	-2.1716	-2.2282	-2.1838	4.30583	4.52539	4.21782	4.59925	4.3268	4.09709	4.50523	4.68549	4.54349	4.34968	4.34105	4.57807	4.42293	0.13442
	Control(leaves)	35.0191	35.7112	35.4436	34.6164	34.7609	34.6981	35.9334	35.9443	35.9946	23.6353	22.8631	24.5997	12.0759	11.3838	11.8082	11.7533	11.8978	11.835	11.3337	11.3446	11.3949	0	0	0	0	0	0	0	0	0	1	1	1	1	1	1	1	1	1	1	1	1	1	0
	4℃	38.6909	38.6526	38.7938	38.2909	38.2304	38.3056	38.9945	38.9006	38.9375	24.3555	23.5097	25.2291	14.3354	14.2971	14.4384	14.7812	14.7207	14.7959	13.7654	13.6715	13.7084	2.25955	2.91336	2.63013	3.0279	2.8229	2.9609	2.4317	2.3269	2.3135	0.208837	0.132737	0.161529	0.122606	0.141326	0.128434	0.185347	0.199312	0.201172	0.167701	0.130789	0.195277	0.164589	0.0323565
														0	0																	1	1
supercontig_52.26	Control(roots)	30.932	31.2525	31.0065	30.2143	30.3056	30.2248	31.8845	31.9906	31.9017	23.8999	23.0914	24.7745	7.03205	7.35254	7.10663	7.1229	7.2142	7.1334	7.11	7.2161	7.1272	0	0	0	0	0	0	0	0	0	1	1	1	1	1	1	1	1	1	1	1	1	1	0
CpbHLH068	NacL(200mM)	29.9385	30.1545	30.1046	29.129	29.3348	29.2206	30.9842	30.8995	30.9072	23.6383	22.8564	24.5981	6.30024	6.51622	6.46635	6.2726	6.4784	6.3642	6.3861	6.3014	6.3091	-0.73181	-0.836327	-0.640282	-0.8503	-0.7358	-0.7692	-0.7239	-0.9147	-0.8181	1.66072	1.7855	1.55863	1.80288	1.66532	1.70432	1.65164	1.88518	1.76308	1.66828	1.72417	1.76663	1.7197	0.0493271
	PEG(25%)	29.1011	29.3192	29.188	28.3576	28.4487	28.3596	30.1252	30.1034	30.0927	23.2631	22.4993	24.1986	5.83798	6.05608	5.92487	5.8583	5.9494	5.8603	5.9266	5.9048	5.8941	-1.19407	-1.29647	-1.18176	-1.2646	-1.2648	-1.2731	-1.1834	-1.3113	-1.2331	2.28797	2.45627	2.26853	2.40261	2.40294	2.4168	2.27111	2.48165	2.35072	2.33759	2.40745	2.36783	2.37095	0.0350353
	ABA	29.9169	29.9456	29.9045	29.1044	29.1597	29.2033	30.8865	30.9027	30.7993	23.2046	22.4128	24.2569	6.71232	6.74099	6.69985	6.6916	6.7469	6.7905	6.6296	6.6458	6.5424	-0.319725	-0.611549	-0.406779	-0.4313	-0.4673	-0.3429	-0.4804	-0.5703	-0.5848	1.24809	1.5279	1.32572	1.34845	1.38252	1.2683	1.39513	1.48483	1.49983	1.36724	1.33309	1.45993	1.38675	0.0656337
	Control(leaves)	32.9969	32.7989	32.8055	32.1063	32.0065	32.0467	32.1107	32.0089	32.0657	23.6353	22.8631	24.5997	9.36156	9.16358	9.1702	9.2432	9.1434	9.1836	7.511	7.4092	7.466	0	0	0	0	0	0	0	0	0	1	1	1	1	1	1	1	1	1	1	1	1	1	0
	4℃	34.6032	34.6125	34.5907	34.0436	33.8954	33.8035	33.9647	33.8078	33.8042	24.3555	23.5097	25.2291	10.2478	10.257	10.2353	10.5339	10.3857	10.2938	8.7356	8.5787	8.5751	0.886216	1.09346	1.06508	1.2907	1.2423	1.1102	1.2246	1.1695	1.1091	0.541031	0.468635	0.477946	0.408753	0.422698	0.46323	0.427916	0.444575	0.463583	0.495871	0.43156	0.445358	0.457596	0.0338569
														0	0
supercontig_1024.1	Control(roots)	29.4791	29.0321	29.3345	28.4096	28.4407	28.5314	30.2908	30.1134	30.2204	23.8999	23.0914	24.7745	5.57917	5.13221	5.43459	5.3182	5.3493	5.44	5.5163	5.3389	5.4459	0	0	0	0	0	0	0	0	0	1	1	1	1	1	1	1	1	1	1	1	1	1	0
CpbHLH027	NacL(200mM)	26.9314	26.7319	26.8394	26.0044	26.1903	26.0874	27.8845	27.9013	27.8026	23.6383	22.8564	24.5981	3.29311	3.09364	3.20111	3.148	3.3339	3.231	3.2864	3.3032	3.2045	-2.28606	-2.03856	-2.23347	-2.1702	-2.0154	-2.209	-2.2299	-2.0357	-2.2414	4.87721	4.10836	4.70265	4.50086	4.04293	4.62355	4.69101	4.10022	4.72856	4.56274	4.38911	4.5066	4.48615	0.0886021
	PEG(25%)	27.4037	27.4399	27.4536	26.7348	26.7044	26.6637	28.3018	28.499	28.3807	23.2631	22.4993	24.1986	4.14065	4.17677	4.19052	4.2355	4.2051	4.1644	4.1032	4.3004	4.1821	-1.43851	-0.955433	-1.24407	-1.0827	-1.1442	-1.2756	-1.4131	-1.0385	-1.2638	2.71042	1.93916	2.36865	2.118	2.21024	2.42099	2.66309	2.05409	2.40127	2.33941	2.24974	2.37282	2.32066	0.0636448
	ABA	27.5981	27.1525	27.2371	26.6816	26.5304	26.6087	28.7013	28.5327	28.5024	23.2046	22.4128	24.2569	4.39348	3.9479	4.03249	4.2688	4.1176	4.1959	4.4444	4.2758	4.2455	-1.18569	-1.18431	-1.4021	-1.0494	-1.2317	-1.2441	-1.0719	-1.0631	-1.2004	2.27472	2.27255	2.64285	2.06967	2.34844	2.36871	2.1022	2.08942	2.29803	2.3967	2.26227	2.16322	2.27406	0.11719
	Control(leaves)	27.711	27.9365	27.8596	27.1586	27.0342	27.1022	28.6917	28.7819	28.8012	23.6353	22.8631	24.5997	4.07562	4.30117	4.22425	4.2955	4.1711	4.2391	4.092	4.1822	4.2015	0	0	0	0	0	0	0	0	0	1	1	1	1	1	1	1	1	1	1	1	1	1	0
	4℃	27.6739	27.5754	27.7069	26.8848	26.8189	27.0022	28.4534	28.4971	28.6913	24.3555	23.5097	25.2291	3.31843	3.21993	3.35143	3.3751	3.3092	3.4925	3.2243	3.268	3.4622	-0.757195	-1.08124	-0.872823	-0.9204	-0.8619	-0.7466	-0.8677	-0.9142	-0.7393	1.6902	2.11586	1.83124	1.89264	1.81743	1.67783	1.82475	1.88452	1.66937	1.8791	1.79597	1.79288	1.82265	0.0489121
														0	0			0
supercontig_177.1	Control(roots)	24.3512	24.2853	24.2035	23.3385	23.3907	23.4492	25.1003	25.1964	25.1738	23.8999	23.0914	24.7745	0.451307	0.385378	0.303586	0.2471	0.2993	0.3578	0.3258	0.4219	0.3993	0	0	0	0	0	0	0	0	0	1	1	1	1	1	1	1	1	1	1	1	1	1	0
CpbHLH019	NacL(200mM)	24.306	24.0557	24.1566	23.5532	23.5904	23.4996	25.4201	25.3125	25.1973	23.6383	22.8564	24.5981	0.667704	0.417431	0.518313	0.6968	0.734	0.6432	0.822	0.7144	0.5992	0.216396	0.0320526	0.214727	0.4497	0.4347	0.2854	0.4962	0.2925	0.1999	0.860713	0.978028	0.861709	0.732195	0.739848	0.820514	0.708972	0.816486	0.870611	0.90015	0.764186	0.79869	0.821008	0.0706765
	PEG(25%)	24.1532	24.1185	24.2019	23.5013	23.5398	23.4372	25.1149	25.2015	25.172	23.2631	22.4993	24.1986	0.890148	0.855425	0.938819	1.002	1.0405	0.9379	0.9163	1.0029	0.9734	0.438841	0.470047	0.635233	0.7549	0.7412	0.5801	0.5905	0.581	0.5741	0.737727	0.721941	0.643837	0.592587	0.598242	0.668917	0.664113	0.6685	0.671705	0.701168	0.619915	0.668106	0.663063	0.0408605
	ABA	25.917	25.9708	25.9642	25.3103	25.2904	25.2463	26.9834	26.8817	26.9034	23.2046	22.4128	24.2569	2.71239	2.76615	2.75959	2.8975	2.8776	2.8335	2.7265	2.6248	2.6465	2.26108	2.38078	2.456	2.6504	2.5783	2.4757	2.4007	2.2029	2.2472	0.208616	0.192006	0.182251	0.159276	0.167438	0.179779	0.189373	0.217201	0.210633	0.194291	0.168831	0.205735	0.189619	0.0188904
	Control(leaves)	30.1823	30.2471	30.2015	29.4041	29.3908	29.4407	31.3556	31.2018	31.1134	23.6353	22.8631	24.5997	6.54695	6.6118	6.56615	6.541	6.5277	6.5776	6.7559	6.6021	6.5137	0	0	0	0	0	0	0	0	0	1	1	1	1	1	1	1	1	1	1	1	1	1	0
	4℃	31.9382	32.0085	32.0248	31.0285	31.1201	31.0996	32.6845	32.7906	32.6015	24.3555	23.5097	25.2291	7.58269	7.65304	7.66933	7.5188	7.6104	7.5899	7.4554	7.5615	7.3724	1.03574	1.04124	1.10318	0.9778	1.0827	1.0123	0.6995	0.9594	0.8587	0.487766	0.485909	0.46549	0.507753	0.472144	0.495755	0.615786	0.514271	0.551449	0.479722	0.491884	0.560502	0.510703	0.043554
supercontig_3.503	Control(roots)	33.5644	33.4337	33.4984	32.9547	32.8863	32.8053	34.6045	34.3648	34.3978	24.9294	24.3324	25.7504	8.635	8.5043	8.56896	8.6223	8.5539	8.4729	8.8541	8.6144	8.6474	0	0	0	0	0	0	0	0	0	1	1	1	1	1	1	1	1	1	1	1	1	1	0
CpbHLH056	NacL(200mM)	31.1118	30.9763	31.0215	30.3979	30.4027	30.5234	32.0816	31.8942	31.9837	25.3034	24.7065	26.1145	5.80835	5.67288	5.71804	5.6914	5.6962	5.8169	5.9671	5.7797	5.8692	-2.82665	-2.83142	-2.85092	-2.9309	-2.8577	-2.656	-2.887	-2.8347	-2.7782	7.09424	7.11773	7.21461	7.62586	7.24859	6.30283	7.39731	7.13394	6.85996	7.14219	7.05909	7.1304	7.11056	0.0449625
	PEG(25%)	27.9876	28.2106	28.1094	27.4746	27.3881	27.4932	28.9271	29.1107	29.0096	24.5476	23.9136	25.3506	3.43998	3.66294	3.56181	3.561	3.4745	3.5796	3.5765	3.7601	3.659	-5.19502	-4.84136	-5.00715	-5.0613	-5.0794	-4.8933	-5.2776	-4.8543	-4.9884	36.6316	28.6678	32.159	33.389	33.8105	29.7187	38.7897	28.9261	31.7437	32.4862	32.3061	33.1532	32.6485	0.446262
	ABA	29.6825	30.0653	29.8905	29.1025	29.3851	29.2246	30.8734	30.6706	30.7657	24.8929	24.2758	25.7045	4.78957	5.17235	4.99752	4.8267	5.1093	4.9488	5.1689	4.9661	5.0612	-3.84543	-3.33195	-3.57145	-3.7956	-3.4446	-3.5241	-3.6852	-3.6483	-3.5862	14.3744	10.0697	11.8881	13.8864	10.8875	11.5043	12.8634	12.5386	12.0103	12.1107	12.0927	12.4708	12.2247	0.213249
	Control(leaves)	26.5723	26.5396	26.6002	26.0043	25.9984	25.9038	27.5542	27.4906	29.5031	24.6016	24.0978	25.4406	1.97074	1.938	1.99867	1.9065	1.9006	1.806	2.1136	2.05	4.0625	0	0	0	0	0	0	0	0	0	1	1	1	1	1	1	1	1	1	1	1	1	1	0
	4℃	25.7095	25.7506	25.6884	25.0132	25.1205	25.0453	27.6904	27.7736	27.7448	25.4995	24.9024	26.4027	0.210014	0.251149	0.188963	0.1108	0.2181	0.1429	1.2877	1.3709	1.3421	-1.76073	-1.68686	-1.80971	-1.7957	-1.6825	-1.6631	-0.8259	-0.6791	-2.7204	3.38869	3.21954	3.50572	3.47184	3.20984	3.16696	1.77264	1.60114	6.59056	3.37132	3.28288	3.32145	3.32521	0.0443383
																0	0	0	0	0	0	0
supercontig_65.63	Control(roots)	29.1523	28.933	29.0316	28.6654	28.4307	28.6031	30.0632	29.9547	29.9324	24.9294	24.3324	25.7504	4.22283	4.0036	4.10213	4.333	4.0983	4.2707	4.3128	4.2043	4.182	0	0	0	0	0	0	0	0	0	1	1	1	1	1	1	1	1	1	1	1	1	1	0
CpbHLH037	NacL(200mM)	29.5358	29.4255	29.4884	28.9956	28.9096	29.0043	30.4508	30.3886	30.4928	25.3034	24.7065	26.1145	4.23243	4.12209	4.18496	4.2891	4.2031	4.2978	4.3363	4.2741	4.3783	0.0095974	0.118496	0.0828298	-0.0439	0.1048	0.0271	0.0235	0.0698	0.1963	0.99337	0.921147	0.944204	1.0309	0.929934	0.981391	0.983843	0.95277	0.872786	0.952907	0.980741	0.936466	0.956705	0.0223801
	PEG(25%)	28.6248	28.6039	28.5982	28.0941	28.1993	27.9863	29.5563	29.5014	29.4996	24.5476	23.9136	25.3506	4.07712	4.0563	4.05056	4.1805	4.2857	4.0727	4.2057	4.1508	4.149	-0.14571	0.0527081	-0.0515704	-0.1525	0.1874	-0.198	-0.1071	-0.0535	-0.033	1.10628	0.964125	1.03639	1.11149	0.878187	1.14711	1.07706	1.03778	1.02314	1.0356	1.0456	1.04599	1.0424	0.00589046
	ABA	28.2343	28.0234	28.1184	27.6829	27.4538	27.5039	28.8947	29.0843	28.9027	24.8929	24.2758	25.7045	3.34135	3.13051	3.22542	3.4071	3.178	3.2281	3.1902	3.3798	3.1982	-0.881487	-0.873087	-0.87671	-0.9259	-0.9203	-1.0426	-1.1226	-0.8245	-0.9838	1.84227	1.83158	1.83618	1.89987	1.89251	2.05994	2.17739	1.77092	1.97767	1.83668	1.95077	1.97533	1.92093	0.0739861
	Control(leaves)	29.0051	29.123	29.0719	28.4473	28.5021	28.4126	29.9513	30.0426	29.9826	24.6016	24.0978	25.4406	4.40351	4.52141	4.47029	4.3495	4.4043	4.3148	4.5107	4.602	4.542	0	0	0	0	0	0	0	0	0	1	1	1	1	1	1	1	1	1	1	1	1	1	0
	4℃	29.681	29.5345	29.5816	28.8025	28.7037	29.7647	30.5782	30.4782	30.5004	25.4995	24.9024	26.4027	4.18151	4.03502	4.08217	3.9001	3.8013	4.8623	4.1755	4.0755	4.0977	-0.221999	-0.486388	-0.388118	-0.4494	-0.603	0.5475	-0.3352	-0.5265	-0.4443	1.16635	1.40093	1.30869	1.36547	1.51887	0.684205	1.26155	1.44043	1.36065	1.29199	1.18952	1.35421	1.27857	0.0831636
																0	0	0	0	0	0	0
supercontig_53.118	Control(roots)	33.2843	33.38	33.2154	31.6673	31.8456	31.6089	34.1146	34.2807	34.1906	24.9294	24.3324	25.7504	8.35483	8.45058	8.28593	7.3349	7.5132	7.2765	8.3642	8.5303	8.4402	0	0	0	0	0	0	0	0	0	1	1	1	1	1	1	1	1	1	1	1	1	1	0
CpbHLH035	NacL(200mM)	33.3091	32.7843	33.1163	31.2681	31.3728	31.3036	33.7412	33.9558	33.9016	25.3034	24.7065	26.1145	8.0057	7.4809	7.81284	6.5616	6.6663	6.5971	7.6267	7.8413	7.7871	-0.349127	-0.969687	-0.473085	-0.7733	-0.8469	-0.6794	-0.7375	-0.689	-0.6531	1.27379	1.95841	1.38807	1.70917	1.79863	1.60147	1.66728	1.61217	1.57254	1.54009	1.70309	1.61733	1.62017	0.0815374
	PEG(25%)	31.9795	32.2389	32.1089	30.4782	30.3087	30.3769	32.9128	33.0116	33.0318	24.5476	23.9136	25.3506	7.43188	7.69126	7.56131	6.5646	6.3951	6.4633	7.5622	7.661	7.6812	-0.922945	-0.759327	-0.724621	-0.7703	-1.1181	-0.8132	-0.802	-0.8693	-0.759	1.89598	1.6927	1.65247	1.70562	2.17061	1.7571	1.74352	1.82678	1.69232	1.74705	1.87778	1.7542	1.79301	0.0734989
	ABA	33.7913	33.8433	33.6987	32.2014	32.1414	32.0006	34.7025	34.7847	34.5608	24.8929	24.2758	25.7045	8.89834	8.95036	8.80579	7.9256	7.8656	7.7248	8.998	9.0802	8.8563	0.543509	0.499776	0.519862	0.5907	0.3524	0.4483	0.6338	0.5499	0.4161	0.6861	0.707217	0.697439	0.664021	0.78328	0.732906	0.644477	0.683067	0.749448	0.696918	0.726736	0.692331	0.705328	0.0186807
	Control(leaves)	31.0134	31.0522	31.1024	30.4213	30.4863	30.512	32.4215	32.3886	32.5016	24.6016	24.0978	25.4406	6.41188	6.45065	6.5008	6.3235	6.3885	6.4142	6.9809	6.948	7.061	0	0	0	0	0	0	0	0	0	1	1	1	1	1	1	1	1	1	1	1	1	1	0
	4℃	31.3082	31.1101	31.2218	30.7412	30.6125	30.6758	32.5764	32.6037	32.5705	25.4995	24.9024	26.4027	5.80872	5.6106	5.72232	5.8388	5.7101	5.7734	6.1737	6.201	6.1678	-0.603165	-0.840044	-0.778483	-0.4847	-0.6784	-0.6408	-0.8072	-0.747	-0.8932	1.51905	1.7901	1.71533	1.39929	1.60036	1.55919	1.74981	1.6783	1.85729	1.67483	1.51962	1.7618	1.65208	0.122683
																0	0	0	0	0	0	0
supercontig_48.15	Control(roots)	27.3904	27.3182	27.3547	26.8004	26.8937	26.9064	28.2246	28.3048	28.3369	24.9294	24.3324	25.7504	2.46096	2.38876	2.42524	2.468	2.5613	2.574	2.4742	2.5544	2.5865	0	0	0	0	0	0	0	0	0	1	1	1	1	1	1	1	1	1	1	1	1	1	0
CpbHLH011	NacL(200mM)	26.5072	26.3294	26.503	25.9857	25.9347	25.8653	27.4458	27.3091	27.3901	25.3034	24.7065	26.1145	1.2038	1.02598	1.19957	1.2792	1.2282	1.1588	1.3313	1.1946	1.2756	-1.25716	-1.36278	-1.22567	-1.1888	-1.3331	-1.4152	-1.1429	-1.3598	-1.3109	2.39025	2.57181	2.33864	2.27963	2.51943	2.66697	2.20824	2.5665	2.48096	2.43357	2.48868	2.41857	2.44694	0.0369176
	PEG(25%)	24.9373	24.9665	24.9037	24.3309	24.4341	24.4078	25.8862	25.9052	25.9617	24.5476	23.9136	25.3506	0.389652	0.418867	0.356048	0.4173	0.5205	0.4942	0.5356	0.5546	0.6111	-2.07131	-1.96989	-2.06919	-2.0507	-2.0408	-2.0798	-1.9386	-1.9998	-1.9754	4.20267	3.91739	4.19652	4.14307	4.11474	4.22749	3.83333	3.99945	3.93237	4.10553	4.16176	3.92172	4.063	0.125546
	ABA	26.631	26.5403	26.5784	26.0948	25.9051	25.9537	27.6857	27.5625	27.6013	24.8929	24.2758	25.7045	1.73803	1.64738	1.68545	1.819	1.6293	1.6779	1.9812	1.858	1.8968	-0.722927	-0.741377	-0.739788	-0.649	-0.932	-0.8961	-0.493	-0.6964	-0.6897	1.65053	1.67177	1.66993	1.56808	1.90792	1.86103	1.40737	1.62046	1.61295	1.66408	1.77901	1.54692	1.66334	0.116044
	Control(leaves)	27.0281	27.2854	27.1178	26.539	26.4885	26.4015	27.9503	28.0035	28.0714	24.6016	24.0978	25.4406	2.42652	2.68388	2.51628	2.4412	2.3907	2.3037	2.5097	2.5629	2.6308	0	0	0	0	0	0	0	0	0	1	1	1	1	1	1	1	1	1	1	1	1	1	0
	4℃	28.422	28.5454	28.4839	27.6627	27.7402	27.5964	29.3552	29.4663	29.5018	25.4995	24.9024	26.4027	2.92256	3.04589	2.98441	2.7603	2.8378	2.694	2.9525	3.0636	3.0991	0.496048	0.362009	0.468132	0.3191	0.4471	0.3903	0.4428	0.5007	0.4683	0.709046	0.77808	0.7229	0.80157	0.733516	0.762971	0.735705	0.706764	0.722816	0.736676	0.766019	0.721762	0.741485	0.0225172

## Sheet: Sheet1
		2 -(∆∆Ct) 1	2 -(∆∆Ct) 2	2 -(∆∆Ct) 2		标准差SD
		1	1	1	1	0
		0.589353	0.700863	0.681698	0.657305	0.0596228
		2.05736	2.49804	2.25136	2.26892	0.220862
		1.16795	1.42799	1.33236	1.30943	0.131524
